# Supplementary material
Source: Elsevier journal article supplement (https://publikationen.ub.uni-frankfurt.de/files/79128/mmc2.pdf)
Supplement: mmc2 [file mmc2.pdf]

## Perspective

# Utilizing multi-objective decision support tools for protected area selection

Alke Voskamp,<sup>1,\*</sup> Susanne A. Fritz,<sup>1,2</sup> Valerie Köcke,<sup>3,4</sup> Matthias F. Biber,<sup>5</sup> Timo Nogueira Brockmeyer,<sup>6</sup> Bastian Bertzky,<sup>7</sup> Matthew Forrest,<sup>1</sup> Allie Goldstein,<sup>8</sup> Scott Henderson,<sup>8</sup> Thomas Hickler,<sup>1,9</sup> Christian Hof,<sup>5</sup> Thomas Kastner,<sup>1</sup> Stefanie Lang,<sup>10</sup> Peter Manning,<sup>1,11</sup> Michael B. Mascia,<sup>8,19</sup> Ian R. McFadden,<sup>12,13</sup> Aidin Niamir,<sup>1</sup> Monica Noon,<sup>8</sup> Brian O'Donnell,<sup>14</sup> Mark Opel,<sup>14,15</sup> Georg Schwede,<sup>16</sup> Peyton West,<sup>17</sup> Christof Schenck,<sup>3,4</sup> and Katrin Böhning-Gaese<sup>1,18</sup>

<sup>1</sup>Senckenberg Biodiversity and Climate Research Centre, 60325 Frankfurt am Main, Germany

<sup>2</sup>Institut für Geowissenschaften, Goethe University, 60438 Frankfurt am Main, Germany

<sup>3</sup>Frankfurt Zoological Society, 60316 Frankfurt am Main, Germany

<sup>4</sup>Frankfurt Conservation Center GmbH, 60316 Frankfurt am Main, Germany

<sup>5</sup>Terrestrial Ecology Research Group, Technical University of Munich, 85354 Freising, Germany

<sup>6</sup>Osnabrück University, 49069 Osnabrück, Germany

<sup>7</sup>Joint Research Centre (JRC), European Commission, 21027 Ispra, Italy

<sup>8</sup>Conservation International, Arlington, VA, USA

<sup>9</sup>Institute of Physical Geography, Goethe University, 60438 Frankfurt, Germany

<sup>10</sup>Legacy Landscapes Fund, Frankfurt am Main, Germany

<sup>11</sup>Department of Biological Sciences, University of Bergen, Bergen, Norway

<sup>12</sup>Swiss Federal Institute for Forest, Snow and Landscape Research (WSL), Zürcherstrasse 111, 8903 Birmensdorf, Switzerland

<sup>13</sup>Department of Environmental Systems Science, ETH Zürich, 8092 Zürich, Switzerland

<sup>14</sup>Campaign for Nature, Durango, CO, USA

<sup>15</sup>Independent Conservation Finance Adviser, Boulder, CO, USA

<sup>16</sup>Campaign for Nature, Badenweiler, Germany

<sup>17</sup>Frankfurt Zoological Society – U.S., Washington, DC, USA

<sup>18</sup>Department of Biological Sciences, Goethe University Frankfurt, 60438 Frankfurt am Main, Germany

<sup>19</sup>Duke University, Durham, NC, USA

\*Correspondence: [alke.voskamp@senckenberg.de](mailto:alke.voskamp@senckenberg.de)

<https://doi.org/10.1016/j.oneear.2023.08.009>

## SUMMARY

Establishing and maintaining protected areas (PAs) is a key action in delivering post-2020 biodiversity targets. PAs often need to meet multiple objectives, ranging from biodiversity protection to ecosystem service provision and climate change mitigation, but available land and conservation funding is limited. Therefore, optimizing resources by selecting the most beneficial PAs is vital. Here, we advocate for a flexible and transparent approach to selecting PAs based on multiple objectives, and illustrate this with a decision support tool on a global scale. The tool allows weighting and prioritization of different conservation objectives according to user-specified preferences as well as real-time comparison of the outcome. Applying the tool across 1,346 terrestrial PAs, we demonstrate that decision makers frequently face trade-offs among conflicting objectives, e.g., between species protection and ecosystem integrity. Nevertheless, we show that transparent decision support tools can reveal synergies and trade-offs associated with PA selection, thereby helping to illuminate and resolve land-use conflicts embedded in divergent societal and political demands and values.

## INTRODUCTION

Halting biodiversity loss is one of the major global challenges faced by humanity in the 21<sup>st</sup> century.<sup>1,2</sup> Human wellbeing, livelihoods, and economies all rely on biodiversity, and collaborative international efforts are needed to conserve it.<sup>1,3</sup> Protected areas (PAs) are a cornerstone of biodiversity conservation. Aichi Target 11 of the Convention on Biological Diversity called for an increase in PA coverage to 17% by 2020 for the terrestrial realm, with a focus on PAs that are of particular importance for biodiversity and ecosystem services, ecologically representative, and well connected<sup>4</sup>; this goal has only partly been reached.<sup>5</sup> Further, Aichi target 11 is increasingly seen as inadequate to safeguard biodiversity.<sup>6–8</sup> The Kunming-Montreal

Global Biodiversity Framework (GBF), which builds on the Aichi targets, has set out 23 action-oriented global targets in line with an ambitious plan to implement broad action that should transform our societies' relationship with biodiversity by 2030.<sup>9</sup> Action Target 3 of the GBF calls for at least 30% of the terrestrial area to be effectively conserved by PAs or "other effective area based conservation measures."<sup>9</sup> This implies not only the transformation of large land areas into new PAs over the next decade but also stresses an urgent need for careful allocation of the long-term conservation funding necessary to effectively protect biological resources: PAs must be both sustainably funded and effectively managed, yet only about 20% of all PAs are considered to meet these criteria.<sup>10</sup> Meanwhile, many PAs have experienced PA downgrading, downsizing, or

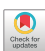

**Table 1. Comparison of strengths and weaknesses of the approach advocated and implemented in this study vs. already existing approaches**

| Approach                               | Methods (tools)                                                                | Strengths and weaknesses                                                                                                                                        | Example studies                                                        | Objectives considered in the example studies                                                        |
|----------------------------------------|--------------------------------------------------------------------------------|-----------------------------------------------------------------------------------------------------------------------------------------------------------------|------------------------------------------------------------------------|-----------------------------------------------------------------------------------------------------|
| Single objective                       | mapping                                                                        | + prioritization map based on one conservation objective<br>– solution for one objective                                                                        | Di Marco et al., <sup>35</sup><br>Riggio et al. <sup>36</sup>          | ecosystem integrity                                                                                 |
| Multiple objectives                    | mapping, stacked layers                                                        | + combined prioritization map across multiple objectives<br>– static solution, all objectives equally important                                                 | Jung et al., <sup>37</sup><br>Dinerstein et al. <sup>8</sup>           | biodiversity, ecosystem services, climate protection                                                |
| Multiple objectives + fixed weights    | mapping, stacked layers, consensus score                                       | + combined prioritization map across multiple objectives<br><br>+ objectives (or variables within objectives) can be weighted individually<br>– static solution | Freudenberger et al., <sup>38</sup><br>Girardello et al. <sup>39</sup> | biodiversity, ecosystem services, ecosystem integrity                                               |
| Multiple objectives + flexible weights | mapping, stacked layers, weighted consensus score, individual ranking of sites | + combined prioritization map across multiple objectives<br><br>+ comparison of trade-offs on the fly<br>+ flexible solution                                    | this study                                                             | biodiversity, ecosystem integrity, climate protection, climatic stability, land-use stability, size |

The table summarizes a literature review and gives a few selected examples. The review focused on studies that published global prioritization maps based on one or multiple conservation objectives and which identified individual sites of conservation importance rather than designed an optimized network of sites (see [supplemental information](#) and [Table S1](#) for details and the considered studies).

degazettement (PADDD)<sup>11</sup> or are threatened by PADDD in the future.<sup>11,12</sup>

Both the allocation of sparse conservation funding for the strengthening of current PAs and the identification of additional sites to expand PA networks frequently require the application of prioritization approaches. A wealth of methods have been developed to inform conservation efforts, which vary widely in complexity. Some approaches evaluate individual sites based on their importance for the global persistence of biodiversity, e.g., the key biodiversity area approach, applying different threshold-based criteria including the proportion of threatened or geographically restricted species covered.<sup>13</sup> In contrast, others rely on complex algorithms to optimize conservation networks toward specific conservation goals, e.g., by considering complementarity, connectivity, or cost efficiency.<sup>14–16</sup>

Priority areas for biodiversity conservation can be defined based on one or more individual conservation objectives to identify areas of high conservation value under each or all given objectives. Initial approaches to identify such areas sought hotspots of various aspects of biodiversity such as species richness or endemism.<sup>17–20</sup> Other approaches highlight the protection of areas that will limit further impacts of global change on biodiversity, for example by identifying remaining ecologically intact ecosystems<sup>21</sup> or sites of high irrecoverable carbon storage.<sup>22,23</sup> Prioritization approaches that focus on more than one objective often combine different conservation goals such as protecting biodiversity and maintaining ecosystem services.

Here, we focus on those prioritization approaches that allow identification of individual sites of conservation importance rather than an optimized network of sites. We apply a transparent site-selection approach that allows users to prioritize sites based on various self-specified conservation objectives. The developed approach allows for an initial screening of potential priority sites for conservation. Trade-offs between different conservation objectives are identified and can be acknowledged explicitly and quantitatively.

### THE CHALLENGE: ALIGNING CONSERVATION PRIORITIES

Aligning different conservation objectives has become increasingly important. For instance, conservation strategies that address both ongoing climate warming and biodiversity loss are urgently needed.<sup>8,24</sup> Nevertheless, setting priorities based on multiple goals is not always straightforward. If there are trade-offs among conservation objectives, a very different set of sites might be optimal under each objective, and a simple compromise among these might not select the best set for the group of objectives as a whole. Relying on approaches tailored toward a single conservation objective or the identification of one key element of the GBF targets may lead to the omission of other critical elements of the GBF vision.<sup>25</sup>

To date, a vast amount of literature on setting global priorities for conservation is available (see [Table S1](#) for an overview relevant to this study). The different approaches vary in the number of objectives that are considered, ranging from one to multiple,

and in the way the included variables are weighted, i.e., not at all or with equal or uneven weights (Table 1). One of the earliest efforts to highlight global areas of importance for biodiversity protection concerns the global biodiversity hotspots.<sup>26</sup> These were derived on the basis of the number of endemic species and habitat loss in the area. With the growing volume and availability of biodiversity data, more approaches to identify areas that are important for biodiversity protection have been introduced. Examples for individual or combined aspects of biodiversity that have been utilized for conservation priority maps are the global species richness patterns for terrestrial vertebrates or vascular plants as well as for various other taxonomic groups, but biodiversity metrics such as species endemism, phylogenetic and functional diversity, or threat status have also been used.<sup>27–31</sup> Similarly, increasing data availability and spatial resolution of those data has profited approaches that focus on prioritizing conservation sites based on the intactness of habitats and biomes or ecoregions.<sup>32</sup> Generally, priority maps for biodiversity protection can be derived on the basis of a single metric for biodiversity or be based on several combined metrics, for example by combining the biodiversity value of an area with the level of threat through human impacts such as habitat degradation within the area<sup>33,34</sup> (see Note S1 and Table S1 for more examples).

Several efforts have also been made to align multiple conservation objectives, such as the protection of biodiversity, the preservation of ecosystem services, and the preservation of areas important for climate mitigation. An example (Table 1) is the comparison of the spatial alignment of terrestrial biodiversity, carbon storage, and water quality regulation, and the identification of areas with the highest synergies among these objectives.<sup>37,40,41</sup> However, there is also evidence for trade-offs among conservation objectives; for example, biodiversity hotspots do not always overlap with different ecosystem services.<sup>42</sup> In summary, a wealth of spatial prioritization maps for conservation efforts has been produced by all these different approaches, either to combine different biodiversity metrics or to align different conservation objectives. In fact, Cimatti et al.<sup>43</sup> subsequently combined 63 different global prioritization maps to derive one spatial prioritization map and identify scientific consensus regions among the different approaches. Nevertheless, all of these selection approaches have one aspect in common: they result in a unique solution for one or a few specific and aligned objectives that select a static geographic set of priorities (Table 1). Here, we advocate a more flexible approach that can handle multiple and conflicting objectives.

The weaker the alignment is among different conservation objectives, the greater is the influence of priority setting (i.e., favoring specific conservation objectives) on the outcome of site-selection approaches. If trade-offs are prevalent, explicit values-based decision making is necessary. The relative priority of different conservation objectives varies among different societal groups, which differ in their demands and values.<sup>44</sup> Also, key local, national, and international actors—governments, corporations, non-governmental organizations (NGOs), scientists, and funders or sponsors—are likely to differ in their priorities.<sup>45</sup> Therefore, decisions as to which areas should be prioritized are often strongly values based, with the values underlying final compromises rarely being made entirely explicit and transparent. Societal and political values are also likely to change

over time, since the purpose of conservation itself has been transient over time, with priorities changing to some degree from one generation to the next.<sup>46</sup> All of this substantiates the need for a flexible but transparent approach to priority setting, where different conservation objectives can be explicitly considered and weighed against each other, to facilitate deliberative societal and political decision making.

## TOWARD A SOLUTION: FLEXIBLE AND TRANSPARENT SITE SELECTION

The allocation of conservation funding is one example whereby the use of a flexible and transparent prioritization approach can be advantageous, since the decision process is likely to involve multiple stakeholders, each of whom may have multiple objectives. Use of a decision support tool can support the identification of conservation synergies and trade-offs, facilitate deliberation and dialog among stakeholders, and enable evidence-informed, values-based collaborative decision making. Here, we illustrate these ideas using a site-selection tool that we developed for this task. We apply a transparent site-selection approach that allows users to identify investment priorities among existing PAs based on various self-specified conservation objectives. In contrast to other approaches, conservation objectives in our approach are explicitly weighted by the users and the results can be immediately assessed, aiding discussions during a transparent values-based decision-making process. We implemented the approach for the terrestrial realm, exclusively using biogeographic information that is publicly available at a global scale. We aimed to identify areas with the highest potential for a range of biodiversity and climate protection goals, but excluded any information on political and economic dimensions from the site-selection algorithm; although these considerations are crucial for conservation and should be evaluated equally transparently, we believe that they should be evaluated separately from biogeographic information as an additional step in the decision-making process.

We defined six different conservation objectives (Figure 1), which represent a broad agreement on priorities for safeguarding biodiversity, climate protection (in the sense of mitigating ongoing climate change), and the present and projected future status of individual sites (identified in an initial stakeholder dialog; see also case study details below). These objectives were: (1) high current biodiversity, focusing on high biodiversity values; (2) high current ecosystem integrity, which focuses on areas that have experienced relatively few anthropogenic impacts; (3) high climate protection, which selects for sites that have large, irrecoverable carbon stocks; (4) large size, which prioritizes larger sites; (5) high land-use stability, which focuses on the future likelihood of land-use change in the immediate surroundings of sites; and (6) high climatic stability, which highlights sites in which climate change is projected to have low impacts on current biodiversity.

We collated a broad set of conservation indicators that reflect these six conservation objectives (Figure 1). The biodiversity objective considered as indicators the total terrestrial species richness of four vertebrate taxa (birds, mammals, amphibians, and reptiles), as well as species endemism and evolutionary diversity<sup>47</sup> for each taxon, to capture the amount of biodiversity as

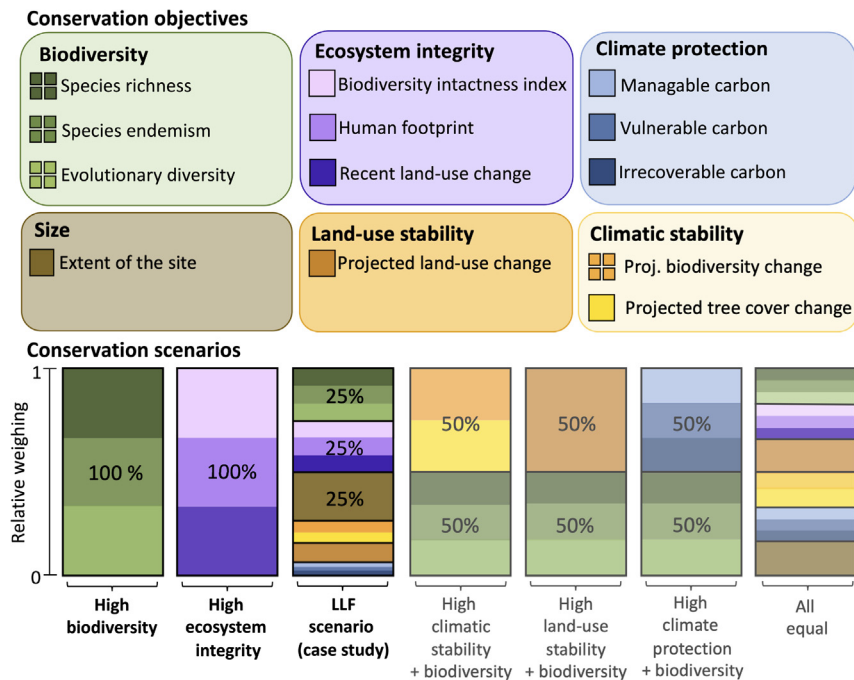

**Figure 1. The included conservation objectives**

The six conservation objectives defined to set priorities for the site selection, the indicators considered for each objective (note that biodiversity and climatic stability [of biodiversity] include indicators for four different vertebrate taxa), and examples for conservation scenarios based on these objectives. By applying a weighting approach, user-specified objectives can be combined into different conservation scenarios, which are therefore customized for specific conservation goals. The high biodiversity, high ecosystem integrity, and Legacy Landscapes Fund (LLF) scenarios are used in the case study.

well as its irreplaceability. The ecosystem integrity objective considered biodiversity intactness, recent land-use change, and the human footprint within the site. The climate protection objective considered the average amount of carbon per hectare that is stored in the vegetation and soil (up to 1 m below ground) of the site and its vulnerability to typical land conversion. The size objective covers the extent of the site in square kilometers. The land-use stability objective considered the projected change in land use in a buffer zone around the site. The climatic stability objective considered the biodiversity change based on the projected future compositional change (turnover)<sup>48</sup> of the four vertebrate taxa and the projected change in tree cover within the site.

These conservation objectives and the underlying indicators were carefully selected to reflect the demands toward the PA network based on the post-2020 GBF as well as the current state of the literature addressing both the biodiversity and climate crises. The biodiversity objective combines information on the number, diversity and rarity of species across several higher taxa within the area to include different aspects of biodiversity.<sup>47,49–52</sup> Highlighting those sites that are of particular importance for biodiversity is in line with the first part of Action Target 3 of the post-2020 GBF.<sup>9</sup> The ecosystem integrity objective uses information on recent impacts on the site and the intactness of the local ecological communities, highlighting those sites that contain ecosystems that are still largely intact. This objective was included because remaining intact ecosystems are often not directly addressed by conservation efforts or international policy frameworks<sup>21,53</sup> but provide various key functions, such as acting as critical carbon sinks, stabilizing hydrological cycles, or providing crucial refuge for imperiled species, intact mega-faunal assemblages, or wide-ranging or migratory species.<sup>21,54–59</sup> The size objective is somewhat related to the ecosystem integrity objective,

under the assumption that larger areas have a higher potential to support populations of target species and maintain functioning ecosystems in the long term.<sup>60,61</sup> The climate protection objective is related to Action Target 8 of the post-2020 GBF<sup>9</sup>, which aims to minimize the impacts of climate change on biodiversity.

The final two objectives were included to assess sites not only based on their current

importance for biodiversity, ecosystem functioning, and climate protection, but also based on the most major future threats toward biodiversity, i.e., projected future climate and land-use change. The five direct drivers of biodiversity loss with the largest impact, according to the 2019 Global Assessment Report by the Intergovernmental Science-Policy Platform on Biodiversity and Ecosystem Services, are changes in land and sea use, direct exploitation of organisms, climate change, pollution, and invasion of alien species.<sup>1</sup> The climatic and land-use stability objectives provide an indication of potential future changes within the site based on climate change responses (geographic range shifts) of the local flora and fauna within the region and give an indication of which sites might be under increasing pressure of land-use change in the region.

A key aspect in developing a transparent site-selection approach was to make results of different values-based objective weighting immediately accessible to a broader audience, including decision makers. We therefore developed an open-source spatial decision support tool to facilitate the priority-based area-selection process. The tool generates a ranking of sites globally as well as for each biogeographic realm based on the six conservation objectives, which are weighted individually by the user. Using sliders to allocate weights to the six conservation objectives, users can design their own conservation scenarios “on the fly” (examples see Figure 1) and directly visualize the resulting ranking. The tool allows a comparison of a far wider range of different conservation scenarios than the examples we give here to evaluate synergies and trade-offs among these and select sites for a more detailed investigation. The current version is publicly available ([https://il-evaluation-support-tool.shinyapps.io/legacy\\_landscapes\\_dst/](https://il-evaluation-support-tool.shinyapps.io/legacy_landscapes_dst/)) and restricted to the case study dataset, objectives, and indicators presented in the paper, but the flexible approach we use can be implemented easily to other datasets, objectives, and goals.

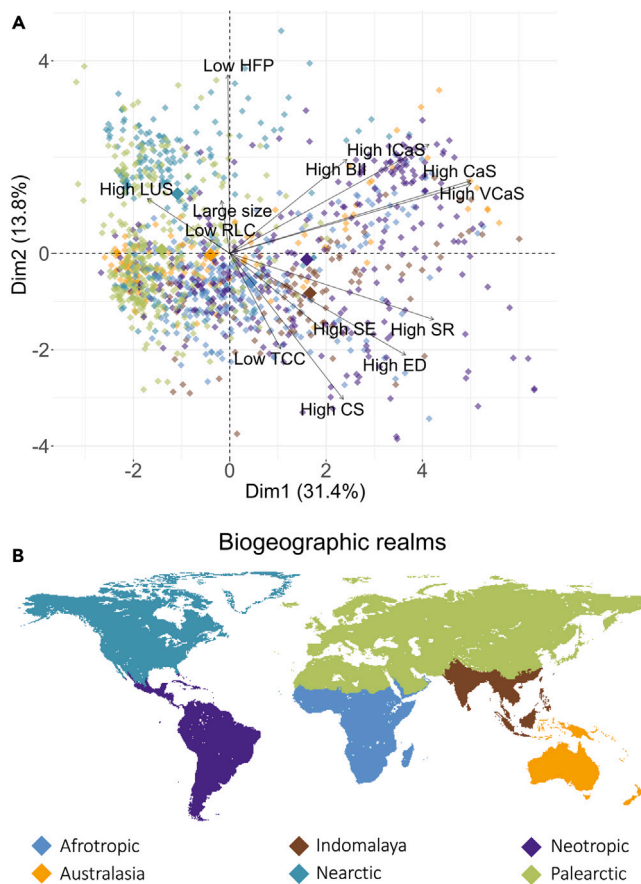

**Figure 2. Trade-offs and synergies between the conservation indicators of individual sites**

Shown are the first and second dimensions of a principal component analysis (PCA) that was performed across 1,346 sites and their variation in 13 indicator variables aggregated into six conservation objectives (order of indicator variables in the legend aligns with Figures 1 and 3; see these for matching variables to objectives) (A). The first and second PCA dimensions together explain 45.3% of the variation in the data. Each dot represents one site. The arrows represent the indicators, and the arrow length indicates the loading of each indicator onto the PCA dimensions (i.e., their correlation with each principal component). Opposite loadings indicate trade-offs between the variables (i.e., a site that has a high value in one of these variables has a low value in the other variable and vice versa). The individual sites (points) are colored by the biogeographic realm (B) in which they are located.<sup>65</sup> High SR, high species richness; High SE, high species endemism; High ED, high evolutionary diversity; High BI, high biodiversity intactness; Low HFP, low human footprint; Low RLC, low recent land-use change; High CaS, high manageable carbon storage; High VCaS, high vulnerable carbon storage; High ICaS, high irrecoverable carbon storage; Large Size, large size; High LUS, high land-use stability; High CS, high climatic stability; Low TCC, low tree cover change.

### ILLUSTRATION OF THE SELECTION APPROACH: THE LEGACY LANDSCAPES FUND AS A CASE STUDY

The Legacy Landscapes Fund (LLF) is a recently established foundation that provides long-term funding for PAs<sup>62</sup>; it is useful in this context because it uses our six conservation objectives, operates on a global level, and mostly focuses on existing sites. This allowed us to run a case study across a significant set of PAs and other sites of interest across the globe in order to demonstrate how the newly developed decision support tool facilitates the flexible evaluation of potential priority sites for conservation

and to explore the potential and limitations of this approach. We assessed synergies and trade-offs among areas according to the different objectives at a global scale as well as within biogeographic realms. Finally, we aimed to investigate how priority setting by different societal actors affects site selection by combining the multiple conservation objectives into broader conservation scenarios that weigh each objective according to user-specified priorities.

The case study dataset for the analysis contained 1,346 sites globally. These sites included formally protected areas of International Union for Conservation of Nature (IUCN) category I or II, listed Natural World Heritage Site (WHS), and registered Key Biodiversity Area (KBA) (see [experimental procedures](#) for details of dataset and methods).<sup>63,64</sup> A principal component analysis (PCA) applied to this dataset globally (Figure 2) and at the level of biogeographic realms (Figure 3) showed that the indicators belonging to each conservation objective tended to be closely aligned at both the global and the realm levels, with the only exception being the two climatic stability indicators across the Australian realm. For example, within the biodiversity objective, species richness (SR), species endemism, and evolutionary diversity were closely aligned at the global scale as well as at the biogeographic realm level, although the alignment between SR and the other two indicators was slightly less tight in the tropical realms (Figure 3).

Looking at the trade-offs and synergies among the objectives, we found that at the global scale the first and second PCA axes explained 31.4% and 13.8% of the variation in the data, respectively. These axes showed relatively clear trade-offs and synergies among the six different conservation objectives (Figure 3). The strongest global trade-off was found between current biodiversity and future land-use stability (Pearson's correlation coefficient  $r [n = 1346] = -0.30, p < 0.01$ ). These two objectives are negatively correlated, as increasing land-use pressure is often projected to occur around sites with exceptionally high current biodiversity (e.g., deforestation of tropical forests for agriculture). The strongest global synergies were found between current biodiversity and future climatic stability ( $r [n = 1,346] = 0.41, p < 0.01$ ) and current biodiversity and high climate protection potential based on the amount of manageable carbon stored in the site ( $r [n = 1,346] = 0.58, p < 0.01$ ). This suggests that sites with exceptionally high biodiversity often coincide with areas of lower projected impacts of climate change on vertebrate communities and tree cover and with a high potential for climate protection through carbon storage. The identified global synergies and trade-offs between the different objectives were only partially consistent within realms, with patterns similar to the global analysis for the Afrotropical realm but notably different alignments in the Palearctic and Nearctic.

Finally, to investigate how priority setting by different societal groups can affect site selection, we compared the outcome of area selection under three different conservation scenarios. We used two extreme and one combined scenario to explore a broad range of values (Figure 1). The first scenario was a biodiversity scenario (biodiversity objective weighted by 100% and the other five objectives by 0%). The second was an ecosystem integrity scenario (ecosystem integrity 100%, all others 0%). The third scenario was a stakeholder-driven scenario that resulted from joint discussion during an expert workshop (LLF scenario) (Figure 1). At this

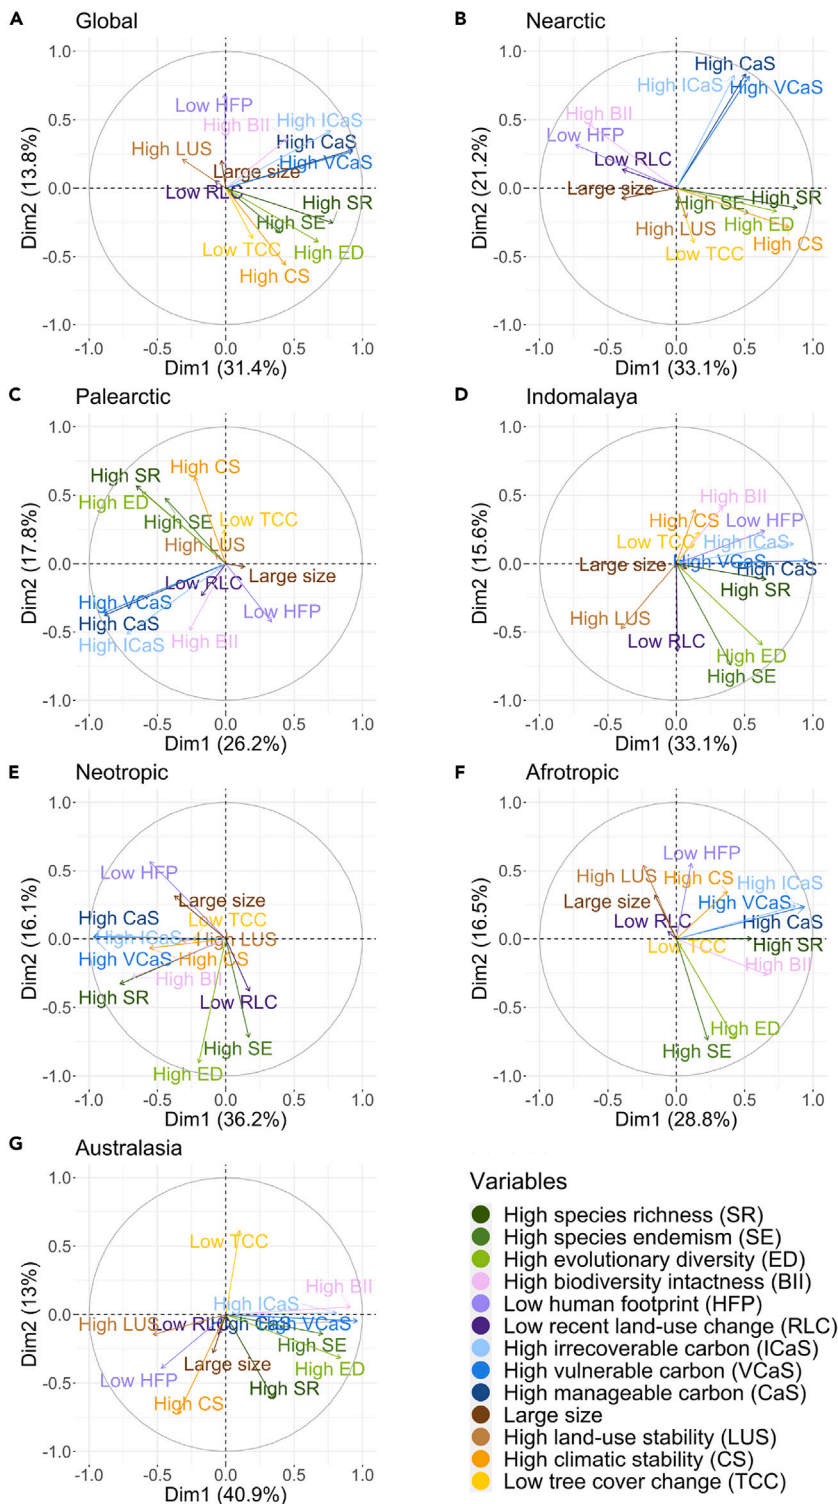

**Figure 3. Trade-offs and synergies between the conservation indicators of individual sites at the global and realm levels**

Shown are the first two axes of the principal component analysis (PCA) for all 1,346 sites included in the Legacy Landscapes case study globally (A) and for each individual realm (B–F). These analyses reveal trade-offs between the conservation objectives, indicated by variables mapping onto opposing ends of a principal component axis. Variable colors indicate conservation objectives as in Figure 1: biodiversity (shades of green), ecosystem integrity (shades of purple), climate protection (shades of blue), size (dark brown), land-use stability (light brown), and climatic stability (orange and yellow). PCA plots show the respective first two axes identified and the percentage of variation explained by each of the axes.

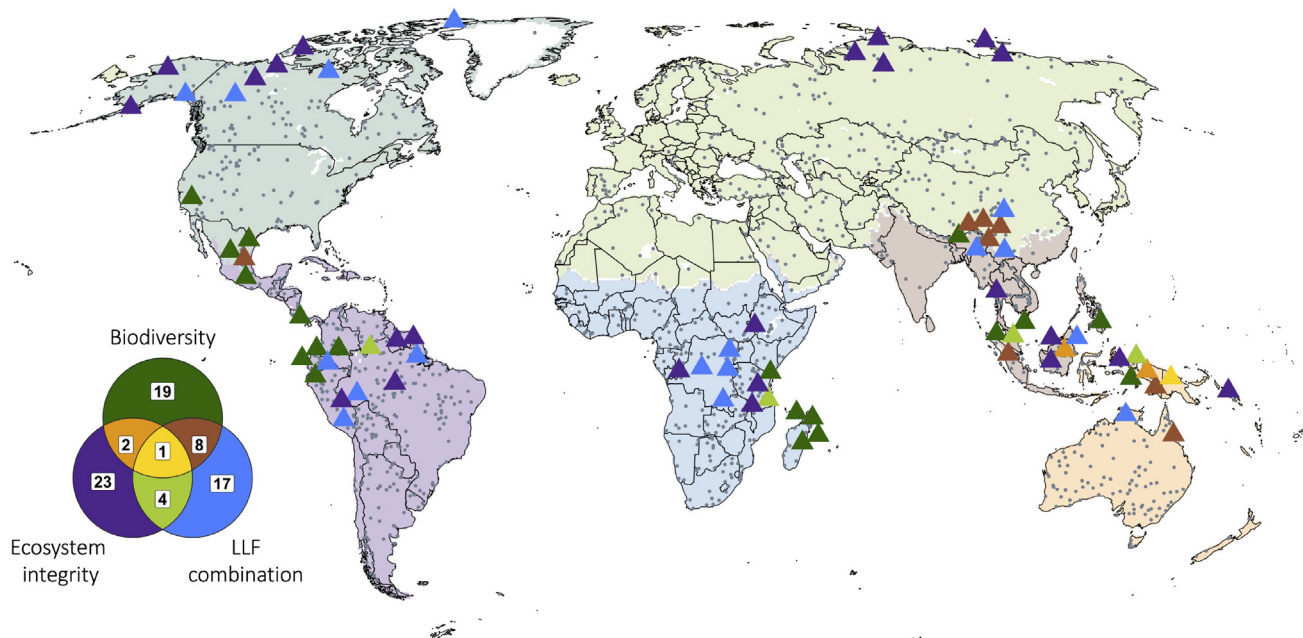

**Figure 4. Spatial distribution of sites**

Spatial distribution of sites highlighting the top five priority sites for each of the three example conservation scenarios: prioritizing biodiversity (dark green), prioritizing ecosystem integrity (purple), and the LLF scenario (Legacy Landscapes Fund, prioritizing a combination of all objectives that stresses high biodiversity, high ecosystem integrity, and large size; blue). The top five sites for all three scenarios (triangles) are shown per biogeographic realm (i.e., 30 top sites per conservation scenario in total). The colors correspond to the three different conservation scenarios and their overlap (if a site is in the top five for more than one objective), as shown in the Venn diagram. Only 14 of the top sites were selected under two scenarios (light green, brown, and orange), and one site was selected under all three scenarios (yellow). Gray points indicate sites included in the analysis but not selected under the top five. Top sites in close geographic proximity are spaced out for visualization and deviate from their exact spatial position. Map colors indicate the different biogeographic realms.

2-day online workshop, which was attended by 35 experts with a strong conservation background, we introduced the site-selection approach, further developed the indicators and objectives, and voted on the LLF scenario (see [experimental procedures](#) for more detail). This scenario reflects the main selection criteria for potential LLF sites (high biodiversity, ecosystem integrity, and size) but considers also the other objectives weighted according to lower priorities (biodiversity, ecosystem integrity, and size weighted with 25% each, climatic stability and land-use stability with 10% each, and climate protection with 5%).

Despite synergy between some objectives, we found that when comparing the top five sites selected for each of the three conservation scenarios within each biogeographic realm, there is little congruence among these scenarios (Figure 4). This implies that selecting sites based on their biodiversity will in most cases result in the protection of different sites compared to a selection based on high ecosystem integrity or the LLF scenario. Australasia has the highest overlap of top sites for the three different scenarios, with five sites being in the top five for at least two of the scenarios. The Nearctic, Neotropical, and Afrotropical realms have the least overlap among the top sites for the investigated scenarios, with only one shared site in the top five of at least two scenarios.

## DISCUSSION

Our case study demonstrates that the selection of “best” sites for nature conservation depends largely on the relative weighting of different conservation priorities and is therefore heavily influenced by decision-maker values. This is supported by the clear

trade-offs among the six conservation objectives at the realm and global scales (Figures 2 and 3) as well as the limited congruence among the top sites selected under the three different conservation scenarios (Figure 4). These results illustrate the opportunities and challenges faced by decision makers when selecting priority areas for nature conservation. Furthermore, they demonstrate the need for a global approach to nature conservation that involves multiple stakeholder groups and perspectives and a transparent decision-making process.

Here, we introduce an approach to select priority areas for biodiversity conservation at the global scale that separates (1) global biogeographic information on biodiversity, ecosystem services, and so forth from (2) a values-based prioritization of different conservation objectives in the decision-making process. This allows the trade-offs between conservation objectives to be understood and acknowledged explicitly and quantitatively. It thereby enables a first transparent evaluation of sites that reflects the varying priorities among different societal or conservation actors. Furthermore, the approach allows optimization of site selection toward more than one objective, which can significantly increase the efficiency of a PA network.<sup>66</sup> Additionally, the transient nature of conservation goals or new drivers of biodiversity loss, such as climate change, might result in the need to adjust prioritization in the future. Both arguments highlight the advantages of a flexible site-selection approach over the static selection of hotspots based on a small number of fixed objectives and indicators.

Our approach goes beyond existing studies that explore the spatial agreement of conservation objectives and presents optimized solutions through aligning several objectives by allowing

the user to change the prioritization on the fly (Table 1). Instead of presenting a static conservation priority map, we present a dynamic result that ranks potential sites for protection based on user preferences. This approach puts the focus on the decision-making process and allows the exploration of trade-offs and synergies among different options. Rather than providing another method to set conservation priorities, our approach is complementary to the various approaches we found in the literature (Tables 1 and S1). It could, for example, be used to explore the differences, synergies, and trade-offs between any of the existing global prioritization maps across PAs.

### Applying the tool to a specific conservation problem

For the LLF, the three conservation objectives of size, biodiversity, and ecosystem integrity are of high priority.<sup>67</sup> Applying the decision support tool to the assembled dataset revealed a trade-off between high biodiversity and high ecosystem integrity, clearly demonstrated in the comparison between the three conservation scenarios—high biodiversity, high ecosystem integrity, and the LLF scenario—which considers multiple conservation objectives. For the actual selection of sites, to be financed by the LLF, the decision support tool enabled an initial screening of potential sites globally. This allowed the LLF to evaluate the performance of individual sites under the desired conservation objectives and to compare different weightings before proceeding with the selection of the pilot sites. Here, the decision support tool was used in an integrative decision-making process which transparently separated biogeographic site screening from other criteria such as stakeholder consent, political commitment, and experience of the implementing NGO (see also below).

### Applying the approach beyond the case study

Our approach and the newly developed tool can be easily extended to include a broader range of biogeographic datasets, additional conservation objectives, or additional sites into the analysis, making the tool widely applicable to a variety of site-selection tasks. Although the current setup of the tool already contains six objectives representing several broad conservation goals (i.e., safeguarding biodiversity or mitigating climate change), these are still to some extent geared toward the case study. To broaden the scope of the tool through additional objectives and opposing the focus on intact ecosystems used in our case study, priority setting could highlight areas that harbor a high amount of threatened biodiversity,<sup>68</sup> e.g., by including an additional objective based on the threat status of all occurring species (i.e., as provided in the IUCN Red List) in a site.<sup>49,69,70</sup> Another obvious and easy possibility to expand the current setup of the tool would be to allow further subsetting of the included sites. Currently the tool allows for an initial screening of sites at the level of biogeographic realms or at the global scale. Information such as the extent of a biogeographic realm or ecoregion that is already protected would need to be considered separately. Adjusting the tool to rank sites not only at the realm level but also at finer scales, for example at the ecoregion level, would allow users to prioritize sites in finer-scale under-represented categories.

Action Target 8 of the post-2020 GBF also calls for a well-connected PA network.<sup>9</sup> Connectivity is highly species specific and landscape dependent, and thus requires local and long-term studies on individual species.<sup>71,72</sup> Assessments on a scale

such as the decision support tool shown here cannot yet reliably capture connectivity. Nonetheless, previous efforts have estimated the connectivity of global PA networks at a coarser scale, based for example on different levels of home range size in mammals<sup>73</sup> or even by modeling the movement of large animals throughout the landscape between PAs.<sup>74</sup> A first step to integrate connectivity into the decision support tool could be to use a distance matrix of sites from surrounding existing PAs. This could give a first rough indication of how well a site is embedded into the PA network and allow prioritization of connected sites over very isolated sites.

### Caveats to consider when applying the tool

There are several core assumptions that need to be kept in mind when using the site-selection tool in the current setup. As currently designed, the tool is meant to allow the comparison of sites and different conservation objectives based on biogeographic variables, which are available at a global scale. This necessitates the use of relatively coarse-grained datasets (resolution here is mostly dependent on the biodiversity data). The biodiversity variables are calculated from global range maps of each terrestrial vertebrate species, which come at a coarse resolution, are of varying quality across species and taxa, and are therefore used for analysis at a 0.5° resolution; these cannot be used to derive accurate species lists for a given protected area.<sup>75</sup> Therefore, the included biodiversity variables give an indication of the biodiversity value of the region a site is located in rather than accurate values for the individual site.

Further, there is always a high level of uncertainty surrounding any future land-use and climate projections, which applies also to the models used to compute the indicators. Aside from specific model-related uncertainties, the projected future impacts will largely depend on socioeconomic decisions and climate mitigation efforts.<sup>76</sup> Nevertheless, we believe that the large-scale geographic patterns of variables included in the analysis remain robust to these uncertainties and allow for a comparison across sites at the chosen resolution.

The tool allows an initial screening of a large number of potential sites globally (or regionally) and can be extremely useful in creating prioritizations of PAs based on different objectives and indicators that can be applied flexibly. This tool, however, is only useful as a first step that allows a range of options to be explored as part of a much broader decision-making process. This decision-making process should include on-site assessments of additional parameters at a higher resolution (e.g., more detailed biological data acquired through surveys and observations) as well as non-biological characteristics. These socioeconomic factors could include, for example, the political legitimacy of the initiative, the involvement of local communities, and the presence of a supportive NGO. In the case of the pilot site selection for the LLF, these factors were considered in the next step that followed the use of the site evaluation tool.

Further, the decision support tool was designed to facilitate value-based discussions by enabling on-the-fly comparison of sites based on different biogeographic attributes. To allow easy handling of the decision support tool and thus enable a wider range of people to use it, weights can only be applied to the individual conservation objectives but not the underlying indicators. This results in limited possibilities to fine-tune the evaluation of sites. Furthermore, the tool does not facilitate the optimization of site



networks, i.e., it does not assess different combinations of sites based on representativeness or cost efficiency. This might lead to unintended effects, such as several sites with similar biodiversity composition being in the top ranks, or the selection of sites where much more funding would be needed to achieve similar conservation outcomes compared to more cost-efficient sites.

### Applying the tool within the post-2020 GBF

The ambition of the Aichi Biodiversity Targets has been increasingly criticized as being too modest to safeguard biodiversity in perpetuity.<sup>6,7</sup> Accordingly, the post-2020 GBF of the Convention on Biological Diversity calls for “at least 30 per cent of terrestrial, inland water and of coastal and marine areas, especially areas of particular importance for biodiversity and ecosystem functions and services, to be effectively conserved.”<sup>9</sup> Thus it becomes increasingly important to identify new sites for conservation—and new ways of conserving—outside of the already delineated areas both on land and in the oceans.<sup>8,77</sup> The presented decision support tool could be extended to aid these efforts, either by adapting it to identify new sites or by expanding the case study dataset. A first possible extension would be the inclusion of the Indigenous and Community Conservation Areas and Other Effective Area-based Conservation Measures, which are increasingly being recognized as effective and potentially more inclusive conservation tools.<sup>78</sup>

Going beyond global priority setting, the post-2020 GBF aims to facilitate implementation primarily through activities at the national level. Furthermore, unlike in the LLF case study, a vast amount of conservation funding is not available at the global scale but rather at the national or regional level. Our approach could be used at the national or subnational level to help prioritize conservation decisions through facilitating transparent value-based discussion and supporting the implementation of the post-2020 GBF at this scale.<sup>79</sup> Applying the tool at the national or regional scale would open the possibility to add more finely resolved datasets to the conservation objectives that are not yet available at the global scale (e.g., species abundances or more specific land-use projections) and thus tailor the decision support tool to specific conservation actions.

An example of a relevant adjustment that may be possible at national scales could be the adjustment of the intended time frame, as the decision support tool with its inclusion of future projections (climatic and land-use stability) as well as the focus on intact ecosystems is currently geared toward longer time horizons. Highlighting sites where there is an urgent need to act (e.g., within a couple of years because of high conservation value in combination with high current pressure) would require the use of very different datasets with a much higher resolution. Working at regional or national scales would allow the inclusion of datasets on recent changes within a site that are not available or very heterogeneous at the global scale (e.g., population trends, recent deforestation rates, or the level of exploitation of natural resources).

In conclusion, the proposed approach facilitates a transparent initial screening of potential priority sites that allows the trade-offs between conservation objectives to be understood and acknowledged explicitly and quantitatively. It promotes the inclusion of multiple stakeholder positions, views, and preferences, and facilitates discourse and decision making while working toward the overarching conservation goals.

## EXPERIMENTAL PROCEDURES

### Resource availability

#### Lead contact

Further information and requests for resources and reagents should be directed to and will be fulfilled by the lead contact, Alke Voskamp ([alke.voskamp@senckenberg.de](mailto:alke.voskamp@senckenberg.de); [alke.voskamp@posteo.net](mailto:alke.voskamp@posteo.net)).

#### Materials availability

This study did not generate unique new materials.

#### Data and code availability

All codes needed to replicate the presented analysis are available from GitHub ([https://github.com/Legacy-Landscapes/LL\\_analysis](https://github.com/Legacy-Landscapes/LL_analysis)). The decision support tool is accessible via [https://ll-evaluation-support-tool.shinyapps.io/legacy\\_landscapes\\_dst/](https://ll-evaluation-support-tool.shinyapps.io/legacy_landscapes_dst/). All codes for the decision support tool are available under [https://github.com/Legacy-Landscapes/LL\\_Decision\\_Tool](https://github.com/Legacy-Landscapes/LL_Decision_Tool).

### The case study dataset and analysis

To assess synergies and trade-offs among the different conservation objectives, we used the LLF as a case study to assemble a global dataset of sites. The LLF is a recently established foundation that provides long-term funding of 1 million US dollars per “legacy landscape” per year. Funding stems from public and private sources. It aims to protect areas of outstanding biodiversity over initially 15 years but with a vision to ensure funding in perpetuity.<sup>67</sup> The LLF is based on a strategic global site-selection approach and the strong long-term commitment of local NGOs, protected area authorities, and local communities “on the ground.”<sup>62</sup> The initial requirements for sites to be considered by the LLF are outstanding biodiversity, a minimum size of 2,000 km<sup>2</sup>, and a protection status as IUCN protected area category I or II for at least 1,000 km<sup>2</sup>. Based loosely on these guidelines, we assembled a dataset and extracted site-specific values for each objective (Figure 1).

### Processing the protected area data

The potential sites currently included in the analysis are PAs within IUCN category I or II, sites listed as a WHS,<sup>64</sup> or sites registered as a KBA.<sup>63</sup> There are various sites in the world where the WHSs or the KBAs overlap with the IUCN PAs. We resolved all such spatial conflicts by retaining the shapefile with the higher protection status where different shapefiles overlapped (IUCN > KBA > WHS). For example, WHSs that were embedded within an IUCN protected area as well as KBAs that overlapped with an IUCN protected area were excluded from the analysis. In some instances, there was only a partial overlap of either a KBA or WHS with an IUCN protected area or a KBA overlapped with an IUCN protected area but was considerably larger (Figure S1). For these cases we kept both shapefiles in the analysis. This was the case for 17 sites (Table S2).

We sampled all protected area polygons into a grid of 0.5° longitude × 0.5° latitude, deriving the percentage overlap of each polygon with the grid cells. To estimate the potential impacts of projected future land-use change around the PAs, we derived 50-km buffers around each protected area polygon and then sampled these into the grid as described above.

### The conservation objectives data

The six conservation objectives were developed in a discussion process among the broader conservation community. We introduced our approach at a 2-day webinar which was attended by 35 experts with a strong conservation background. These included (1) conservation scientists, (2) international conservation NGOs, (3) the financial sector, and (4) policy sectors, in particular the German Federal Ministry for Economic Cooperation and Development (BMZ). These experts provided feedback on the objectives and indicators through a questionnaire (see supplemental information). They were asked to (1) report any missing objectives, (2) report any missing indicators that should be included in the objectives, and (3) rank the suggested objectives by their personal preferences.

### Processing the conservation indicator datasets

The six different conservation objectives included in the decision support tool are biodiversity, ecosystem integrity, climatic stability, land-use stability, climate protection, and size. Each of these objectives consists of one or several underlying biogeographic indicators as follows.

#### Objective biodiversity

*Indicator: Species richness.* The SR for four taxa of terrestrial vertebrates was derived from BirdLife International (birds), IUCN (mammals, amphibians), or Global Assessment of Reptile Distributions (reptiles) range-map polygons, which were gridded to the 0.5° grid.<sup>49–51</sup> The species ranges were stacked to obtain species lists for each grid cell. The resulting species matrix was then merged with the site grid and the unique species across all grid cells

within each site grid were summed up as the SR value for the site (the resulting map is shown in Figure S2). For the site selection, sites with a high SR are of high value, whereas sites with a low SR are of less value.

**Indicator: Species endemism—corrected range-size rarity.** To capture unique biodiversity, we included a measure for the number of range-restricted (endemic) species within a protected area, the so-called range-size rarity (RSR), which has been used as a proxy for species endemism.<sup>52</sup> This is derived by summing the species for each grid cell, including weights that reflect species' range sizes. Usually RSR is calculated by weighting each species by the inverse of its range extent (e.g., number of cells occupied globally) so that species within a given grid cell have larger weights if they occur in very few other grid cells.<sup>80,81</sup> The resulting values are highly correlated with SR, because the weighted species values are summed up per grid cell.<sup>52</sup> Therefore, we corrected for SR by dividing the weighted RSR value by the total number of species within the grid cell following Crisp et al.<sup>52</sup> (the resulting map is shown in Figure S3). Using this corrected RSR as a measure instead of the raw number of endemic species is of advantage because there is no arbitrary cutoff to define endemic species. Site-specific RSR values were derived for the four vertebrate taxa in the same way as SR values, by merging the species matrix (containing the species-specific RSR values for each grid cell) to the site grid, summing the RSR values of the unique species across all grid cells of the site. For the site selection, sites with a high RSR are of high value, whereas sites with a low RSR are of less value.

**Indicator: Evolutionary diversity—phylogenetic endemism.** Evolutionary diversity was included to evaluate how evolutionarily unique the species within a protected area are. Measures of phylogenetic diversity, such as Faith's PD, can give an idea of how much evolutionary history is stored within a set of species.<sup>82</sup> A high amount of evolutionary history has been linked to higher productivity and stability of ecosystems.<sup>83,84</sup> Evolutionary diversity was calculated using phylogenetic endemism (PE), which is a combined measure of phylogenetic diversity and uniqueness of a species community.<sup>47</sup> PE identifies areas with high numbers of evolutionarily isolated and geographically restricted species. In addition to the summed shared evolutionary history of a species assemblage, PE therefore incorporates the spatial restriction of phylogenetic branches covered by the assemblage.<sup>47</sup> PE was calculated following the method developed by Rosauer et al.<sup>47</sup> To derive the PE values, we used the phylogenetic supertree for all four terrestrial vertebrate taxa from Hedges et al.,<sup>85</sup> which was combined with the aforementioned species range-map data from IUCN and BirdLife International.<sup>86</sup> The number of species for which both distribution and phylogenetic data were available differed across taxa, but all analyses included high percentages of the globally known species in each taxon (Table S3). PE was derived for each 0.5° grid cell, after which the PE for each protected area was calculated as mean PE across all grid cells within the area polygon (the resulting map is shown in Figure S4). For the site selection, sites with a high PE are of high value, whereas sites with a low PE are of less value.

**Objective ecosystem integrity**

**Indicator: Biodiversity intactness index.** The biodiversity intactness index (BII) represents the modeled average abundance of present species relative to the abundance of these species in an intact ecosystem.<sup>87</sup> This means it gives an indication how much species abundances in an area have already changed due to anthropogenic impacts such as land-use change. We used the global map of the BII provided by Newbold et al.<sup>88</sup> (see Newbold et al.<sup>89</sup> for a detailed description of how the BII is derived). The values were extracted for each grid cell and grid cell values were weighted by their percentage overlap with the protected area polygon, then weighted mean BII values were derived for each protected area. For the site selection, sites with a low BII within the protected area are of lower value, whereas sites with a high BII are of higher value.

**Indicator: Human footprint.** As a measure of how pristine the PAs still are in general, a measure of the human footprint (HFP) within the area was included. Estimates of the HFP within PAs were derived using the data of Venter et al.<sup>90</sup> We used the standardized HFP that was provided by Venter et al. and includes data on the extent of built environments, cropland, pasture land, human population density, night-time lights, and the density of railways, roads, and navigable waterways. We aggregated the HFP layers to half-degree resolution, derived HFP values for each grid cell, weighted grid cells by their percentage overlap with the protected area polygon, and derived the mean HFP for each protected area. For the site selection, sites with a high HFP within the protected area are of lower value, whereas sites with a low HFP are of higher value.

**Indicator: Recent land-use change.** To derive past changes in the land cover of the protected area, we calculated the average percentage of the site altered from biomes (natural land cover classes) to human-dominated land cover classes (anthromes; i.e., urban/semi-urban areas and cultivated areas). The time series of fractions of land cover classes, ranging from 1992 to 2018, was ob-

tained from the GEOessential project.<sup>91</sup> The land cover classes used in this were derived from the European Space Agency Climate Change Initiative Land Cover and were available on a 30-km grid. We calculated the total percentage change from biomes to anthromes between the years 1992 and 2018 and aggregated the data into the half-degree grid. The summed changes for each protected area polygon were derived from the grid cell values weighted by the percentage overlap of grid cells and polygon. For the site selection, sites with a high percentage of land-use change between 1992 and 2018 are of lower value, whereas sites with a low percentage of land-use change are of higher value.

**Objective climatic stability**

**Indicator: Projected biodiversity change.** To assess the climatic stability of a protected area, we evaluated the potential impacts of climate change on the biodiversity within the site. Climate change is already driving observable shifts in species distributions, and it is well known that many taxa are shifting their ranges toward higher latitudes.<sup>92,93</sup> However, idiosyncratic species responses to climate change have also been observed.<sup>94–96</sup> These range shifts have the potential to reshuffle species assemblages,<sup>48,97</sup> which can have highly unpredictable impacts on the assemblage (e.g., changes in prey-predator balance or competition). We assume that species assemblages predicted to change only weakly in composition in the future or to experience very few species losses are under less risk from climate change than species assemblages projected to experience a lot of reshuffling. Under this assumption, we defined the inverse of projected turnover in species as an indicator for climatic stability, and calculated climatic stability for each protected area until 2050. The projected turnover is calculated for each of the four vertebrate taxa based on species-level range-map projections derived from species distribution models (SDMs).

The SDMs have been published previously (see Hof et al.<sup>98</sup> for a detailed account of the modeling methods) and are based on an ensemble of two modeling algorithms (Generalized Additive Models and Generalized Boosted Regression Models) and four different global climate models (MIROC5, GFDL-ESM2M, HadGEM2-ES, and IPSL-CM5A-LR). These models use the meteorological forcing dataset Earth2Observe, WFDEI, and ERA-Interim data, which were merged and bias-corrected for Inter-Sectoral Impact Model Intercomparison Project (ISI-MIP) (EWEMBI<sup>99</sup>), as dataset for the current climatic conditions (from 1980 to 2009). As future climate dataset, they rely on bias-corrected global climate scenarios produced by ISI-MIP phase 2b.<sup>100</sup> Here we used the projections assuming a medium dispersal scenario (allowing dispersal across a distance equal to half the largest radius of the range polygons of a species) and a medium representative concentration pathway of 6.0 (i.e., a medium scenario of global warming). Species with range extents of fewer than ten grid cells were excluded from the modeling. In total we had modeled distributions available for 22,652 vertebrate species (see Table S4) on the 0.5° grid. To derive species lists per site we applied species-specific thresholds that maximized the fit to the current data, using the true skill statistic (MaxTSS), to translate the projected probabilities of occurrence into binary presence/absence data.<sup>101</sup>

For each site, all species that were projected to occur currently and/or in future (2050) were extracted. Turnover was then calculated between the current and future species assemblage of a site, using the formula for Bray-Curtis dissimilarity<sup>102</sup>:

$$B_{ij} = \frac{2C_{ij}}{S_i + S_j}, \quad (\text{Equation 1})$$

where  $S_i$  and  $S_j$  are the species counts at the two points in time, and  $C_{ij}$  are the counts of species found in both sites (the resulting map is shown in Figure S5). For the site selection, sites with a high projected turnover as a consequence of global climate change are of low value, whereas sites with a low projected turnover are of high value.

**Indicator: Projected tree cover change.** We included the projected potential forest cover change from 1995 until 2050 based on the projected change in tree cover of the LPJ-GUESS process-based dynamic vegetation-terrestrial ecosystem model.<sup>103</sup> This variable captures changes in forest cover but not necessarily changes in other vegetation types, e.g., the desertification of grasslands and drylands. The projected changes in forest cover are driven by climate and CO<sub>2</sub> changes but do not include projected changes in land use. The climate input for the model was derived from the ISI-MIP2b simulations (see detailed description above under "indicator: climatic stability of biodiversity"). The projected change in tree cover was provided as a percentage per grid cell.

The grid cell values were weighted by their percentage overlap with the protected area polygon, after which the weighted mean percentage change in tree cover was derived for each protected area. Both a strong decrease and a strong increase in tree cover could equal a risk for a site, e.g., a projected loss in tree cover could be a risk for a forest while a projected

increase could be a risk for grasslands. Therefore, sites with a low projected change in tree cover, in either direction, are of higher value for the site selection, whereas sites with a high projected change in tree cover are of lower value.

#### Objective land-use stability

**Indicator: Projected land-use change around the site.** Projected land-use change was derived from the ISIMIP2b simulations of current and future land use for 1995 and 2050, based on the MAgPIE and REMIND-MAgPIE models,<sup>104–106</sup> using the assumptions of population growth and economic development as described in Frieler et al.<sup>105</sup> Land-use change models accounted for climate impacts (e.g., on crop yields) and were driven with the same climate model projections as the SDMs used to derive climatic stability (see above). The ISIMIP land-use scenarios provide percentage cover of six different land-use types (urban areas, rainfed crop, irrigated crop, and pastures, as well as rainfed and irrigated bioenergy crops) at a spatial resolution of 0.5°. We averaged the land-use change for each land-use type across the four global climate models. We then calculated a summed value of land-use change (cropland, biofuel cropland, and pastures) between the two different time periods (1995 and 2050) per grid cell. To obtain an estimate of the potential pressure that future land-use change could put on a protected area, we derived the mean and maximum values of the projected land-use change across all grid cells in the 50-km buffer zone around each protected area (see “processing the protected area data”). The grid cell values were weighted by their extent of overlap with the buffer zone to derive the final value for each site. For the site selection, sites with a high projected land-use change around the protected area are of low value, whereas sites with a low projected land-use change are of higher value.

#### Objective climate protection

**Indicator: Manageable carbon.** Here we used the estimated amount of manageable carbon as provided by Noon et al.<sup>23</sup> Manageable carbon is defined by Goldstein et al.<sup>22</sup> as an ecosystems carbon stock that is primarily affected by human activities that either maintain, increase, or decrease its size. This layer is derived from a comprehensive suite of carbon datasets across terrestrial, coastal, and freshwater ecosystems globally.<sup>22</sup> It includes the amount of carbon stored in the above and below-ground vegetation as well as soil organic carbon stocks up to 30-cm depth or up to 100 cm within inundated soil, as these depths are most relevant to common disturbances.<sup>22</sup> We aggregated the carbon data<sup>23</sup> to a 0.5° resolution and calculated the amount of manageable carbon storage in tons per grid cell. Aggregating the data to the same resolution as the other datasets before using it for the analysis is necessary to speed up data processing for the decision support tool. The grid cell values were weighted by their percentage overlap with the protected area polygon to derive the final mean manageable carbon storage value per site. For the site selection, sites with lower baseline carbon stocks are of lower climate protection value, whereas sites with higher baseline carbon stocks are of higher climate protection value.

**Indicator: Vulnerable carbon.** Vulnerable carbon is defined by Goldstein et al.<sup>22</sup> as the amount of manageable carbon, described above, that is likely to be released through typical land conversion in an ecosystem. Considered conversion drivers here were agriculture for grasslands, peatlands, and tropical forests; forestry for boreal and temperate forests; and aquaculture or development for coastal ecosystems.<sup>22</sup> Data for vulnerable carbon were processed as described above for manageable carbon. For the site selection, sites with higher vulnerable carbon stocks are allocated a higher suitability for long-term conservation than sites with lower vulnerable carbon stocks.

**Indicator: Irrecoverable carbon.** Irrecoverable carbon is defined as the amount of the vulnerable carbon, described above, which if it is lost through typical land conversion actions cannot be recovered over the following 30 years, even if human activities cease.<sup>22</sup> Data for vulnerable carbon were processed as described above for manageable carbon. For the site selection, sites with higher irrecoverable carbon stocks are allocated a higher suitability for long-term conservation than sites with lower irrecoverable carbon stocks.

#### Objective size

**Indicator: Extent of the site.** For the size conservation objective, we preselected sites that are larger than 2,000 km<sup>2</sup>. Despite being a quite arbitrary threshold, the minimum size was set as a result of the LLF stakeholder debate based on the assumption that larger areas have a higher potential to support populations of target species and to maintain functioning ecosystems in the long term.<sup>60,61</sup> Even for areas above this threshold, the size of the site is still an important criterion under this reasoning, and we used the extent of the site polygon as variable/indicator of this. The area in km<sup>2</sup> was derived from the site polygons (see “processing the protected area data”). The IUCN sites and WHSs were provided in Mollweide projection. To calculate the area extent, the entire dataset was projected to Mollweide projection and km<sup>2</sup> were then measured in QGIS using the area measurement tool.<sup>107</sup>

#### Scaling and weighting the indicators for site evaluation

We calculated values for each indicator variable for each site included in the conservation decision support tool (see correlation matrix for indicators within the different objectives, Figure S7). For both summarizing the individual indicators into conservation objectives and weighting them in the decision support tool as well as for the PCA, these values need to be scaled. Therefore, all variables were scaled from 0 to 1, where high values have high priority and low values have low priority for conservation. For some of the variables the original data are opposite to this scale (e.g., for the HFP an area with a high value is of lower conservation value than a low value); therefore, we multiplied such variables by  $-1$  after scaling them. The variables for which the scale was reversed were HFP, recent land-use change, land-use stability, and climate stability of species communities and tree cover change. For the change in tree cover we assumed that both high positive values (i.e., strong increase in tree cover) as well as high negative values (i.e., strong decrease in tree cover) are not desirable. Therefore, we changed the original variable into absolute values. The variable is then interpreted in the same way as all other variables with high values (1) being good and low values (0) being less desirable for conservation.

To aggregate indicators that belong to one conservation objective into a single variable, we averaged the scaled variables and rescaled the resulting values to range from 0 to 1. The three carbon storage variables that are included in the climate protection goal constituted the only variables that are nested (i.e., irrecoverable carbon is part of the vulnerable carbon stock, and vulnerable carbon is part of the baseline carbon stock in the site). Nevertheless, we treated the carbon stock variables in the same way as the other variables because we assumed that the different carbon variables are each of comparable priority. For example, the protection of irrecoverable carbon might arguably be as important for climate protection as the sole protection of manageable carbon. Taking the average across the three variables acknowledges these values. Assume that there are two sites, one with a high amount of manageable carbon but no irrecoverable carbon and one with lower manageable carbon but with a high amount of that being irrecoverable; these sites come out with a similar averaged value. Thus, although the second site has less carbon storage potential in total, some of it is of high importance for climate protection (see correlation matrix for carbon storage, Figure S8).

#### Principal component analysis of the included indicators

We investigated global synergies and trade-offs among the final set of conservation objectives using a PCA across all sites. To further explore whether synergies and trade-offs between the objectives were different in biogeographic regions of the world, we repeated the PCA separately for each of the six terrestrial biogeographic realms.<sup>65</sup> The analysis was conducted in R (version 4.1.1), using the “prcomp” function from the “stats” package.<sup>108</sup> All variables were scaled and shifted to be zero centered before the analysis. The PCA plots (Figure S6) were generated using the “fviz\_pca” function of the “factoextra” package.<sup>109</sup>

#### Sensitivity analysis of the site rankings

We assessed the correlation between the scaled values that were calculated for each conservation objective for each site included in the analysis. As expected, based on the identified synergies and trade-offs in the PCA analysis, the Pearson correlation coefficients between the different conservation objectives were low (Figure S7). The highest correlation ( $r = 0.58$ ) was found between the biodiversity and the climate protection objectives.

The correlation between the different indicators included within the conservation objectives varied between the objectives (Figure S8). Within the biodiversity (Pearson’s  $r > 0.20$  and  $< 0.77$ ) and the climate protection (Pearson’s  $r > 0.85$  and  $r < 1$ ) objectives, the individual indicators tended to be more strongly correlated than within the ecosystem integrity (Pearson’s  $r > 0.01$  and  $r < 0.08$ ) and climatic stability (Pearson’s  $r > -0.08$  and  $r < 0.88$ ) objectives.

The conservation decision support tool allows the selection and weighting of the individual conservation objectives but does not offer a subweighting of the individual indicators included within an objective. To investigate how much the rankings of individual sites could vary if they were evaluated based on a single indicator instead of the combined objective values, we looked at the changes in rank positions across all sites included in the analysis (Figures S9–S11). For comparison, we also looked at the changes in ranking positions between the conservation objectives, evaluating sites based on one objective at a time. We found that the average rank change between the different conservation objectives was 435 rank positions (Figure S9). Looking at the changes in rank positions within the individual conservation objectives, we found that the magnitude of the average change in rank position differed strongly between the different objectives (Figures S10 and S11). While the average change across the three biodiversity indicators across all sites was 221 rank positions, the average change across the two climatic stability indicators was 377 rank

positions. Although there is variation in the ranking positions between the individual indicators included within the conservation objectives, the changes in ranking positions between the conservation objectives is markedly higher.

#### The webinar

We introduced the site-selection approach at a 2-day online webinar, which was attended by 35 experts with a strong conservation background. During the workshop the different conservation objectives and indicator variables were presented and discussed. We used a questionnaire (Figures S12–S16) to determine any missing conservation objectives or indicators as well as to allow everyone to order the conservation objectives by their perceived importance. In total, 22 of the 35 attendants responded to the questionnaire.

#### The decision support tool

To make the analysis accessible to the broader conservation community and enable a rapid comparison of sites based on the user-specified prioritization of the different conservation objectives, we designed an interactive spatial decision support tool in which weightings can be modified (see Note S2 and Figures S17–S22 for detailed content of the app interface). The user interface for the tool was developed using R Shiny version 1.5.0.<sup>110</sup>

#### SUPPLEMENTAL INFORMATION

Supplemental information can be found online at <https://doi.org/10.1016/j.oneear.2023.08.009>.

#### ACKNOWLEDGMENTS

We thank all participants of the expert workshop for valuable discussions and input to the development of the decision support tool, and the Frankfurt Zoological Society staff in the project areas who tested the tool and helped to evaluate its use for conservation. We gratefully acknowledge the use of the Goethe-HLR HPC at the Center for Scientific Computing at Goethe University Frankfurt for some of the computationally heavy aspects of this work. We also thank BirdLife International for making the KBA data available as well as the ISIMIP and ISIPedia—the open climate-impacts encyclopedia funded by JPI Climate and the EU, grant number 690462—for their support and data availability. Furthermore, we thank the Temperatio Foundation for their financial support. S.A.F. was supported by the German Research Foundation DFG (FR 3246/2-2) and the Leibniz Competition of the Leibniz Association (P52/2017); A.N. was supported by European Union's Horizon 2020 research and innovation program under grant agreement no. 689443.

#### AUTHOR CONTRIBUTIONS

Conceptualization, A.V., S.A.F., V.K., C.S., and K.B.G.; methodology, A.V., S.A.F., and K.B.G.; feedback on methodology, all authors; software, A.V., T.N.B., and M.F.B.; writing – original draft, A.V., S.A.F., V.K., and K.B.G.; writing – review and editing, all authors.

#### DECLARATION OF INTERESTS

The authors declare no competing interests.

#### REFERENCES

- IPBES (2019). In Summary for policymakers of the global assessment report on biodiversity and ecosystem services of the Intergovernmental Science-Policy Platform on Biodiversity and Ecosystem Services, S. Diaz, J. Settele, E.S. Brondizio, H.T. Ngo, M. Guèze, J. Agard, A. Arneth, P. Balvanera, K.A. Brauman, and S.H.M. Butchart, et al., eds.
- Pereira, H.M., Leadley, P.W., Proença, V., Alkemade, R., Scharlemann, J.P.W., Fernandez-Manjarrès, J.F., Araújo, M.B., Balvanera, P., Biggs, R., Cheung, W.W.L., et al. (2010). Scenarios for Global Biodiversity in the 21st Century. *Science* 330, 1496–1501.
- Dasgupta, P. (2021). The Economics of Biodiversity: The Dasgupta Review.
- Convention on Biological Diversity (2010). “Strategic Plan for Biodiversity 2011 - 2020, Including Aichi Biodiversity Targets”. <https://www.cbd.int/sp/>.
- (2020). Secretariat of the Convention on Biological Diversity. Global Biodiversity Outlook 5.
- Noss, R.F., Dobson, A.P., Baldwin, R., Beier, P., Davis, C.R., Dellasala, D.A., FRANCIS, J., Locke, H., Nowak, K., Lopez, R., et al. (2012). Bolder Thinking for Conservation. *Conserv. Biol.* 26, 1–4.
- Larsen, F.W., Turner, W.R., and Mittermeier, R.A. (2015). Will protection of 17% of land by 2020 be enough to safeguard biodiversity and critical ecosystem services? *Oryx* 49, 74–79.
- Dinerstein, E., Joshi, A.R., Vynne, C., Lee, A.T.L., Pharend-Deschênes, F., França, M., Fernando, S., Birch, T., Burkart, K., Asner, G.P., et al. (2020). A “Global Safety Net” to reverse biodiversity loss and stabilize Earth’s climate. *Sci. Adv.* 6.
- Secretariat of the United Nations Convention on Biological Diversity (2022). Kunming-Montreal Global Biodiversity Framework Draft. decision submitted by the President. <https://www.cbd.int/doc/c/e6d3/cd1d/daf663719a03902a9b116c34/cop-15-l-25-en.pdf>.
- Dasgupta, P. (2021). The Economics of Biodiversity: The Dasgupta Review, Abridged Version, Chapter 19 Natures Supply and Our Demands.
- Golden Kroner, R.E., Qin, S., Cook, C.N., Roopa, K., Pack, S.M., Bonilla, O.D., Cort-Kansinally, K.A., Coutinho, B., Feng, M., Martínez Garcia, M.I., et al. (2019). The uncertain future of protected lands and waters. *Science* 364, 881–886.
- Kuempel, C.D., Chauvenet, A.L.M., Symes, W.S., and Possingham, H.P. (2021). Predicted protected area downsizing impedes conservation progress across terrestrial ecoregions in the tropics and subtropics. *Conserv. Sci. Pract.*
- IUCN (2016). A Global Standard for the Identification of Key Biodiversity Areas. Version 1.0 (IUCN).
- Margules, C.R., and Pressey, R.L. (2000). Systematic conservation planning. *Nature* 405, 243–253.
- Moilanen, A., Franco, A.M.A., Early, R.I., Fox, R., Wintle, B., and Thomas, C.D. (2005). Prioritizing multiple-use landscapes for conservation: methods for large multi-species planning problems. *Proc. R. Soc. B Biol. Sci.* 272, 1885–1891.
- Moilanen, A., Wilson, K., and Possingham, H. (2009). Spatial Conservation Prioritization: Quantitative Methods and Computational Tools (Oxford University Press).
- Jenkins, C.N., Pimm, S.L., and Joppa, L.N. (2013). Global patterns of terrestrial vertebrate diversity and conservation. *Proc. Natl. Acad. Sci. USA* 110, E2602–E2610.
- Orme, C.D.L., Davies, R.G., Burgess, M., Eigenbrod, F., Pickup, N., Olson, V.A., Webster, A.J., Ding, T.-S., Rasmussen, P.C., Ridgely, R.S., et al. (2005). Global hotspots of species richness are not congruent with endemism or threat. *Nature* 436, 1016–1019.
- Satterfield, A.J., Crosby, M.J., Long, A.J., and Wege, D.C. (1998). Endemic Bird Areas of the World: Priorities for Biodiversity Conservation (BirdLife International)).
- Ceballos, G., and Ehrlich, P.R. (2006). Global mammal distributions, biodiversity hotspots, and conservation. *Proc. Natl. Acad. Sci. USA* 103, 19374–19379.
- Watson, J.E.M., Venter, O., Lee, J., Jones, K.R., Robinson, J.G., Possingham, H.P., and Allan, J.R. (2018). Protect the last of the wild. *Nature* 563, 27–30.
- Goldstein, A., Turner, W.R., Spawn, S.A., Anderson-Teixeira, K.J., Cook-Patton, S., Fargione, J., Gibbs, H.K., Griscom, B., Hewson, J.H., Howard, J.F., et al. (2020). Protecting irrecoverable carbon in Earth’s ecosystems. *Nat. Clim. Change* 10, 287–295.
- Noon, M.L., Goldstein, A., Ledezma, J.C., Roehrdanz, P.R., Cook-Patton, S.C., Spawn-Lee, S.A., Wright, T.M., Gonzalez-Roglich, M., Hole, D.G., Rockström, J., et al. (2021). Mapping the irrecoverable carbon in Earth’s ecosystems. *Nat. Sustain.* 5, 37–46.
- Pörtner, H.O., Scholes, R.J., Agard, J., Archer, E., Arneth, A., Bai, X., Barnes, D., Burrows, M., Chan, L., Cheung, W.L., et al. (2021). Scientific Outcome of the IPBES-IPCC Co-sponsored Workshop on Biodiversity and Climate Change.
- Allan, J.R., Possingham, H.P., Atkinson, S.C., Waldron, A., Di Marco, M., Butchart, S.H.M., Adams, V.M., Kissling, W.D., Worsdell, T., Sandbrook, C., et al. (2022). The minimum land area requiring conservation attention to safeguard biodiversity. *Science* 376, 1094–1101.
- Myers, N., Mittermeier, R.A., Mittermeier, C.G., da Fonseca, G.A.B., and Kent, J. (2000). Biodiversity hotspots for conservation priorities. *Nature* 403, 853–858.
- Voskamp, A., Baker, D.J., Stephens, P.A., Valdes, P.J., and Willis, S.G. (2017). Global patterns in the divergence between phylogenetic diversity and species richness in terrestrial birds. *J. Biogeogr.* 44, 709–721.
- Daru, B.H., le Roux, P.C., Gopalraj, J., Park, D.S., Holt, B.G., and Greve, M. (2019). Spatial overlaps between the global protected areas network

- and terrestrial hotspots of evolutionary diversity. *Global Ecol. Biogeogr.* 28, 757–766.
29. Mazel, F., Guilhaumon, F., Mouquet, N., Devictor, V., Gravel, D., Renaud, J., Cianciaruso, M.V., Loyola, R., Diniz-Filho, J.A.F., Mouillot, D., et al. (2014). Multifaceted diversity–area relationships reveal global hotspots of mammalian species, trait and lineage diversity. *Global Ecol. Biogeogr.* 23, 836–847.
  30. Brum, F.T., Graham, C.H., Costa, G.C., Hedges, S.B., Penone, C., Radeloff, V.C., Rondinini, C., Loyola, R., and Davidson, A.D. (2017). Global priorities for conservation across multiple dimensions of mammalian diversity. *Proc. Natl. Acad. Sci. USA* 114, 7641–7646.
  31. Kier, G., Kreft, H., Lee, T.M., Jetz, W., Ibsch, P.L., Nowicki, C., Mutke, J., and Barthlott, W. (2009). A global assessment of endemism and species richness across island and mainland regions. *Proc. Natl. Acad. Sci. USA* 106, 9322–9327.
  32. Beyer, H.L., Venter, O., Grantham, H.S., and Watson, J.E.M. (2020). Substantial losses in ecoregion intactness highlight urgency of globally coordinated action. *Conserv. Lett.* 13, e12692.
  33. Mokany, K., Ferrier, S., Harwood, T.D., Ware, C., Di Marco, M., Grantham, H.S., Venter, O., Hoskins, A.J., and Watson, J.E.M. (2020). Reconciling global priorities for conserving biodiversity habitat. *Proc. Natl. Acad. Sci. USA* 117, 9906–9911.
  34. Gumbs, R., Gray, C.L., Böhm, M., Hoffmann, M., Grenyer, R., Jetz, W., Meiri, S., Roll, U., Owen, N.R., and Rosindell, J. (2020). Global priorities for conservation of reptilian phylogenetic diversity in the face of human impacts. *Nat. Commun.* 11, 2616.
  35. Di Marco, M., Cardillo, M., Possingham, H.P., Wilson, K.A., Blomberg, S.P., Boitani, L., and Rondinini, C. (2012). A novel approach for global mammal extinction risk reduction. *Conserv. Lett.* 5, 134–141.
  36. Riggio, J., Baillie, J.E.M., Brumby, S., Ellis, E., Kennedy, C.M., Oakleaf, J.R., Tait, A., Tepe, T., Theobald, D.M., Venter, O., et al. (2020). Global human influence maps reveal clear opportunities in conserving Earth's remaining intact terrestrial ecosystems. *Global Change Biol.* 26, 4344–4356.
  37. Jung, M., Arnell, A., de Lamo, X., García-Rangel, S., Lewis, M., Mark, J., Merow, C., Miles, L., Ondo, I., Pironon, S., et al. (2021). Areas of global importance for conserving terrestrial biodiversity, carbon and water. *Nat. Ecol. Evol.*
  38. Freudenberger, L., Hobson, P., Schluck, M., Kreft, S., Vohland, K., Sommer, H., Reichle, S., Nowicki, C., Barthlott, W., and Ibsch, P.L. (2013). Nature conservation: priority-setting needs a global change. *Biodivers. Conserv.* 22, 1255–1281.
  39. Girardello, M., Santangeli, A., Mori, E., Chapman, A., Fattorini, S., Naidoo, R., Bertolino, S., and Svenning, J.-C. (2019). Global synergies and trade-offs between multiple dimensions of biodiversity and ecosystem services. *Sci. Rep.* 9, 5636.
  40. Map, N. (2020). *Nature Map Earth*. See: <https://naturemap.earth/>
  41. Zhu, L., Hughes, A.C., Zhao, X.-Q., Zhou, L.-J., Ma, K.-P., Shen, X.-L., Li, S., Liu, M.-Z., Xu, W.-B., and Watson, J.E.M. (2022). Regional scalable priorities for national biodiversity and carbon conservation planning in Asia. *Sci. Adv.* 7, eabe4261.
  42. Naidoo, R., Balmford, A., Costanza, R., Fisher, B., Green, R.E., Lehner, B., Malcolm, T.R., and Ricketts, T.H. (2008). Global mapping of ecosystem services and conservation priorities. *Proc. Natl. Acad. Sci. USA* 105, 9495–9500.
  43. Cimatti, M., Brooks, T.M., and Di Marco, M. (2021). Identifying science-policy consensus regions of high biodiversity value and institutional recognition. *Glob. Ecol. Conserv.* 32, e01938.
  44. Peter, S., Le Provost, G., Mehring, M., Müller, T., and Manning, P. (2021). Cultural worldviews consistently explain bundles of ecosystem service prioritisation across rural Germany. *People Nat.* n/a.
  45. O'Connor, C., Marvier, M., and Kareiva, P. (2003). Biological vs. social, economic and political priority-setting in conservation. *Ecol. Lett.* 6, 706–711.
  46. Mace, G.M. (2014). Whose conservation? *Science* 345, 1558–1560.
  47. Rosauer, D.A.N., Laffan, S.W., Crisp, M.D., Donnellan, S.C., and Cook, L.G. (2009). Phylogenetic endemism: a new approach for identifying geographical concentrations of evolutionary history. *Mol. Ecol.* 18, 4061–4072.
  48. Voskamp, A., Butchart, S.H.M., Baker, D.J., Wilsey, C.B., and Willis, S.G. (2021). Site-Based Conservation of Terrestrial Bird Species in the Caribbean and Central and South America Under Climate Change. *Front. Ecol. Evol.* 9, 234.
  49. IUCN (2016). *The IUCN Red List of Threatened Species*. See: <https://www.iucnredlist.org/resources/spatial-data-download>
  50. BirdLife International and NatureServe (2015). *Bird Species Distribution Maps of the World* (BirdLife International). Version 5.0.
  51. Roll, U., Feldman, A., Novosolov, M., Allison, A., Bauer, A.M., Bernard, R., Böhm, M., Castro-Herrera, F., Chirio, L., Collen, B., et al. (2017). The global distribution of tetrapods reveals a need for targeted reptile conservation. *Nat. Ecol. Evol.* 1, 1677–1682.
  52. Crisp, M.D., Laffan, S., Linder, H.P., and Monro, A. (2001). Endemism in the Australian flora. *J. Biogeogr.* 28, 183–198.
  53. Lovejoy, T.E. (2016). Conservation Biology: The Importance of Wilderness. *Curr. Biol.* 26, R1235–R1237.
  54. Betts, M.G., Wolf, C., Ripple, W.J., Phalan, B., Millers, K.A., Duarte, A., Butchart, S.H.M., and Levi, T. (2017). Global forest loss disproportionately erodes biodiversity in intact landscapes. *Nature* 547, 441–444.
  55. Watson, J.E.M., Evans, T., Venter, O., Williams, B., Tulloch, A., Stewart, C., Thompson, I., Ray, J.C., Murray, K., Salazar, A., et al. (2018). The exceptional value of intact forest ecosystems. *Nat. Ecol. Evol.* 2, 599–610.
  56. Bauer, S., and Hoye, B.J. (2014). Migratory Animals Couple Biodiversity and Ecosystem Functioning Worldwide. *Science* 344, 1242552.
  57. Ripple, W.J., Newsome, T.M., Wolf, C., Dirzo, R., Everatt, K.T., Galetti, M., Hayward, M.W., Kerley, G.I.H., Levi, T., Lindsey, P.A., et al. (2022). Collapse of the world's largest herbivores. *Sci. Adv.* 7, e1400103.
  58. Klein, C.J., Wilson, K.A., Watts, M., Stein, J., Carwardine, J., Mackey, B., and Possingham, H.P. (2009). Spatial conservation prioritization inclusive of wilderness quality: A case study of Australia's biodiversity. *Biol. Conserv.* 142, 1282–1290.
  59. Salati, E., Dall'Olio, A., Matsui, E., and Gat, J.R. (1979). Recycling of water in the Amazon Basin: An isotopic study. *Water Resour. Res.* 15, 1250–1258.
  60. Schwartz, M.W. (1999). Choosing the Appropriate Scale of Reserves for Conservation. *Annu. Rev. Ecol. Systemat.* 30, 83–108.
  61. Cantù-Salazar, L., and Gaston, K.J. (2010). Very Large Protected Areas and Their Contribution to Terrestrial Biological Conservation. *Bioscience* 60, 808–818.
  62. Landscapes Fund, L. (2021). *Charter Internationaler Naturerbe Fonds - Legacy Landscapes Fund*.
  63. BirdLife International. (2019). *Digital Boundaries of Key Biodiversity Areas from the World Database of Key Biodiversity Areas*. Developed by the KBA Partnership. <http://www.keybiodiversityareas.org/>.
  64. UNEP - WCMC, and IUCN (2020). *Protected Planet (The World Database on Protected Areas (WDPA))*.
  65. Olson, D.M., Dinerstein, E., Wikramanayake, E.D., Burgess, N.D., Powell, G.V.N., Underwood, E.C., D'Amico, J.A., Itoua, I., Strand, H.E., Morrison, J.C., et al. (2001). Terrestrial ecoregions of the world: A new map of life on earth. *Bioscience* 51, 933–938.
  66. Sala, E., Mayorga, J., Bradley, D., Cabral, R.B., Atwood, T.B., Auber, A., Cheung, W., Costello, C., Ferretti, F., Friedlander, A.M., et al. (2021). Protecting the global ocean for biodiversity, food and climate. *Nature* 592, 397–402.
  67. BMZ Division 102, and KfW Centre of Competence for Infrastructure Water Natural Resources (2020). *The Legacy Landscapes Fund Safeguarding Outstanding Biodiversity for Humanity - the Next Level of Conservation*.
  68. Mittermeier, R.A., Mittermeier, C.G., Brooks, T.M., Pilgrim, J.D., Konstant, W.R., da Fonseca, G.A.B., and Kormos, C. (2003). Wilderness and biodiversity conservation. *Proc. Natl. Acad. Sci. USA* 100, 10309–10313.
  69. Venter, O., Fuller, R.A., Segan, D.B., Carwardine, J., Brooks, T., Butchart, S.H.M., Di Marco, M., Iwamura, T., Joseph, L., O'Grady, D., et al. (2014). Targeting Global Protected Area Expansion for Imperiled Biodiversity. *PLoS Biol.* 12, e1001891.
  70. BirdLife International. (2018). *IUCN Red List for Birds*. <http://www.birdlife.org>. 2018.
  71. Crooks, K.R., and Sanjayan, M. (2006). In *Connectivity conservation: maintaining connections for nature* K. R. Crooks and M. Sanjayan, eds. (Cambridge University Press).
  72. Bêlisle, M. (2005). Measuring landscape connectivity: The challenge of behavioural landscape ecology. *Ecology* 86, 1988–1995.
  73. Santini, L., Saura, S., and Rondinini, C. (2016). Connectivity of the global network of protected areas. *Divers. Distrib.* 22, 199–211.
  74. Brennan, A., Naidoo, R., Greenstreet, L., Mehrabi, Z., Ramankutty, N., and Kremen, C. (2022). Functional connectivity of the world's protected areas. *Science* 376, 1101–1104.

75. Rondinini, C., Wilson, K.A., Boitani, L., Grantham, H., and Possingham, H.P. (2006). Tradeoffs of different types of species occurrence data for use in systematic conservation planning. *Ecol. Lett.* 9, 1136–1145.
76. O'Neill, B.C., Kriegler, E., Riahi, K., Ebi, K.L., Hallegatte, S., Carter, T.R., Mathur, R., and van Vuuren, D.P. (2014). A new scenario framework for climate change research: the concept of shared socioeconomic pathways. *Clim. Change* 122, 387–400.
77. Secretariat of the United Nations Convention on Biological Diversity (2021). First Draft of the Post-2020 Global Biodiversity Framework. <https://www.cbd.int/doc/c/abb5/591f/2e46096d3f0330b08ce87a45/wg2020-03-03-en.pdf>.
78. Gurney, G.G., Darling, E.S., Ahmadi, G.N., Agostini, V.N., Ban, N.C., Blythe, J., Claudet, J., Epstein, G., Estradivari, Himes-Cornell, A., et al. (2021). Biodiversity needs every tool in the box: use OECMs. *Nature* 595, 646–649.
79. Perino, A., Pereira, H.M., Felipe-Lucia, M., Kim, H., Kühl, H.S., Marselle, M.R., Meya, J.N., Meyer, C., Navarro, L.M., van Klink, R., et al. (2022). Biodiversity post-2020: Closing the gap between global targets and national-level implementation. *Conserv. Lett.* 15, e12848.
80. Williams, P., Gibbons, D., Margules, C., Rebelo, A., Humphries, C., and Pressey, R. (1996). A Comparison of Richness Hotspots, Rarity Hotspots, and Complementary Areas for Conserving Diversity of British Birds. *Conserv. Biol.* 10, 155–174.
81. Williams, P.H., Humphries, C.J., and Gaston, K.J. (1994). Centres of seed-plant diversity: the family way. *Proc. R. Soc. Lond. Ser. B Biol. Sci.* 256, 67–70.
82. Faith, D.P. (1992). Conservation evaluation and phylogenetic diversity. *Biol. Conserv.* 61, 1–10.
83. Cadotte, M.W., Cavender-Bares, J., Tilman, D., and Oakley, T.H. (2009). Using Phylogenetic, Functional and Trait Diversity to Understand Patterns of Plant Community Productivity. *PLoS One* 4, e5695.
84. Cadotte, M.W., Dinnage, R., and Tilman, D. (2012). Phylogenetic diversity promotes ecosystem stability. *Ecology* 93, S223–S233.
85. Hedges, S.B., Marin, J., Suleski, M., Paymer, M., and Kumar, S. (2015). Tree of life reveals clock-like speciation and diversification. *Mol. Biol. Evol.* 32, 835–845.
86. Marin, J., Rapacciuolo, G., Costa, G.C., Graham, C.H., Brooks, T.M., Young, B.E., Radeloff, V.C., Behm, J.E., Helmus, M.R., and Hedges, S.B. (2018). Evolutionary time drives global tetrapod diversity. *Proc. R. Soc. B Biol. Sci.* 285, 20172378.
87. Scholes, R.J., and Biggs, R. (2005). A biodiversity intactness index. *Nature* 434, 45–49.
88. Newbold, T., Hudson, L.N., Arnell, A.P., and Contu, S. (2016). Dataset: Global map of the Biodiversity Intactness Index, from Newbold et al (Science Portal). ([data.nhm.ac.uk](http://data.nhm.ac.uk)).
89. Newbold, T., Hudson, L.N., Arnell, A.P., Contu, S., De Palma, A., Ferrier, S., Hill, S.L.L., Hoskins, A.J., Lysenko, I., Phillips, H.R.P., et al. (2016). Has land use pushed terrestrial biodiversity beyond the planetary boundary? A global assessment. *Science* 353, 288LP–291.
90. Venter, O., Sanderson, E.W., Magrath, A., Allan, J.R., Beher, J., Jones, K.R., Possingham, H.P., Laurance, W.F., Wood, P., Fekete, B.M., et al. (2016). Sixteen years of change in the global terrestrial human footprint and implications for biodiversity conservation. *Nat. Commun.* 7, 12558.
91. Niamir, A., Salati, S., Gómez-Giménez, M., Werner, C., and Hickler, T. (2020). The Fraction of Land Cover Classes; Derived Variables from ESA CCI Land Cover Time-Series (1992 - 2018) (1.0 (Zenodo)). [Data set].
92. Chen, I.-C., Hill, J.K., Ohlemüller, R., Roy, D.B., and Thomas, C.D. (2011). Rapid range shifts of species associated with high levels of climate warming. *Science* 333, 1024–1026.
93. Lenoir, J., Bertrand, R., Comte, L., Bourgeaud, L., Hattab, T., Murienne, J., and Grenouillet, G. (2020). Species better track climate warming in the oceans than on land. *Nat. Ecol. Evol.* 4, 1044–1059.
94. Gibson-Reinemer, D.K., and Rahel, F.J. (2015). Inconsistent Range Shifts within Species Highlight Idiosyncratic Responses to Climate Warming. *PLoS One* 10, e0132103.
95. Moritz, C., Patton, J.L., Conroy, C.J., Parra, J.L., White, G.C., and Beissinger, S.R. (2008). Impact of a century of climate change on small-mammal communities in Yosemite National Park, USA. *Science* 322, 261–264.
96. VanDerWal, J., Murphy, H.T., Kutt, A.S., Perkins, G.C., Bateman, B.L., Pery, J.J., and Reside, A.E. (2013). Focus on poleward shifts in species' distribution underestimates the fingerprint of climate change. *Nat. Clim. Change* 3, 239–243.
97. Voskamp, A., Hof, C., Biber, M.F., Böhning-Gaese, K., Hickler, T., Niamir, A., Willis, S.G., and Fritz, S.A. (2022). Projected climate change impacts on the phylogenetic diversity of the world's terrestrial birds: more than species numbers. *Proc. R. Soc. B Biol. Sci.* 289, 20212184.
98. Hof, C., Voskamp, A., Biber, M.F., Böhning-Gaese, K., Engelhardt, E.K., Niamir, A., Willis, S.G., and Hickler, T. (2018). Bioenergy cropland expansion may offset positive effects of climate change mitigation for global vertebrate diversity. *Proc. Natl. Acad. Sci. USA* 115, 13294.
99. Lange, S. (2016). Earth2Observe, WFDEI and ERA-Interim Data Merged and Bias-Corrected for ISIMIP (EWEMBI) (GFZ Data Serv).
100. Frieler, K., Lange, S., Piontek, F., Reyer, C.P.O., Schewe, J., Warszawski, L., Zhao, F., Chini, L., Denvil, S., Emanuel, K., et al. (2017). Assessing the impacts of 1.5°C global warming - simulation protocol of the Inter-Sectoral Impact Model Intercomparison Project (ISIMIP2b). *Geosci. Model Dev. (GMD)* 10.
101. Allouche, O., Tsoar, A., and Kadmon, R. (2006). Assessing the accuracy of species distribution models: prevalence, kappa and the true skill statistic (TSS). *J. Appl. Ecol.* 43, 1223–1232.
102. Bray, J.R., and Curtis, J.T. (1957). An ordination of the upland forest communities of southern Wisconsin. *Ecol. Monogr.* 27, 326–349.
103. Smith, B., Wårlind, D., Arneeth, A., Hickler, T., Leadley, P., Silberg, J., and Zaehe, S. (2014). Implications of incorporating N cycling and N limitations on primary production in an individual-based dynamic vegetation model. *Biogeosciences* 11, 2027–2054.
104. Popp, A., Humpenöder, F., Weindl, I., Bodirsky, B.L., Bonsch, M., Lotze-Campen, H., Müller, C., Biewald, A., Rolinski, S., Stevanovic, M., et al. (2014). Land-use protection for climate change mitigation. *Nat. Clim. Change* 4, 1095–1098.
105. Popp, A., Calvin, K., Fujimori, S., Havlik, P., Humpenöder, F., Stehfest, E., Bodirsky, B.L., Dietrich, J.P., Doelmann, J.C., Gusti, M., et al. (2017). Land-use futures in the shared socio-economic pathways. *Global Environ. Change* 42, 331–345.
106. Stevanović, M., Popp, A., Lotze-Campen, H., Dietrich, J.P., Müller, C., Bonsch, M., Schmitz, C., Bodirsky, B.L., Humpenöder, F., and Weindl, I. (2016). The impact of high-end climate change on agricultural welfare. *Sci. Adv.* 2.
107. QGIS Development Team (2021). QGIS Geographic Information System.
108. R Development Core Team. (2012). R: A Language and Environment for Statistical Computing (R Foundation for Statistical Computing). Available at: <http://www.R-project.org>
109. Kassambara, A., and Mundt, F. (2020). factoextra: Extract and Visualize the Results of Multivariate Data Analysis. R Packag. version 1.0.7.
110. Chang, W., Cheng, J., Allaire, J., Xie, Y., and McPherson, J. (2020). shiny: Web Application Framework for R. R package.

**One Earth, Volume 6**

## **Supplemental information**

### **Utilizing multi-objective decision**

#### **support tools for protected area selection**

**Alke Voskamp, Susanne A. Fritz, Valerie Köcke, Matthias F. Biber, Timo Nogueira Brockmeyer, Bastian Bertzky, Matthew Forrest, Allie Goldstein, Scott Henderson, Thomas Hickler, Christian Hof, Thomas Kastner, Stefanie Lang, Peter Manning, Michael B. Mascia, Ian R. McFadden, Aidin Niamir, Monica Noon, Brian O'Donnell, Mark Opel, Georg Schwede, Peyton West, Christof Schenck, and Katrin Böhning-Gaese**

# 1 Note S1: Screened literature on global prioritization approaches

2 At the start of the project, we screened the available literature on global prioritization approaches, to  
3 identify a suitable tool that would allow to explore and compare the trade-offs between different  
4 conservation objectives flexibly. Although there are numerous prioritization approaches available based  
5 on various conservation objectives, none of them was applicable for the task at hand. The majority of  
6 approaches presented static maps on global priority areas for conservation based on one or more  
7 objectives, and only very few approaches considered weighing the included objectives (or variables  
8 included within the objectives) to obtain a consensus map across the different objectives. Table S1  
9 provides a list of the global studies that we selected as highly relevant to our approach (i.e. not those  
10 with a focus on prioritizing a network of sites or identifying sites of high complementarity to an existing  
11 site network, but rather studies that resulted in priority maps across assemblages, sites, or some other  
12 spatial unit).

13

14 **Table S1:** Studies that present global prioritization maps based on one or multiple conservation  
15 objectives. The column objectives considered shows if the study is focused on a ‘single’ objective, which  
16 could be based on one or more variables (e.g. biodiversity measured based on several indicators like  
17 species richness, number of threatened species, etc.); on ‘multiple’ objectives which could be based on  
18 several variables (e.g. biodiversity, measured based on several indicators like species richness and  
19 number of threatened species, as well as ecosystem integrity, measured based on several indicators such  
20 as human footprint and intactness of species assemblages); or on ‘multiple weighted’ objectives which  
21 could be based on several variables and where the objectives (or the variables within the objectives)  
22 were not equally weighted.

| # | Authors                         | Year | Title                                                                                            | # of objectives considered | Variables                                                                |
|---|---------------------------------|------|--------------------------------------------------------------------------------------------------|----------------------------|--------------------------------------------------------------------------|
| 1 | Albuquerque et al. <sup>1</sup> | 2015 | Global patterns and environmental correlates of high-priority conservation areas for vertebrates | single                     | vertebrate richness<br>complementarity                                   |
| 2 | Allan et al. <sup>2</sup>       | 2022 | The minimum land area requiring conservation                                                     | multiple                   | key biodiversity areas,<br>ecologically intact areas,<br>protected areas |



|    |                                    |      |                                                                                                                      |          |                                                                                                                                   |
|----|------------------------------------|------|----------------------------------------------------------------------------------------------------------------------|----------|-----------------------------------------------------------------------------------------------------------------------------------|
|    |                                    |      | attention to safeguard biodiversity                                                                                  |          |                                                                                                                                   |
| 3  | Allan et al. <sup>3</sup>          | 2017 | Temporally inter-comparable maps of terrestrial wilderness and the Last of the Wild                                  | single   | remaining wilderness                                                                                                              |
| 4  | Belote et al. <sup>4</sup>         | 2020 | Mammal species composition reveals new insights into Earth's remaining wilderness                                    | multiple | intactness mammal communities, human footprint                                                                                    |
| 5  | Beyer et al. <sup>5</sup>          | 2020 | Substantial losses in ecoregion intactness highlight urgency of globally coordinated action                          | single   | habitat intactness                                                                                                                |
| 6  | Brooks et al. <sup>6</sup>         | 2004 | Coverage provided by the global protected area system: Is it enough?                                                 | single   | species richness, threatened species, protection coverage                                                                         |
| 7  | Brooks et al. <sup>7</sup>         | 2006 | Global biodiversity conservation priorities                                                                          | multiple | high biodiversity threat, low biodiversity threat                                                                                 |
| 8  | Brum et al. <sup>8</sup>           | 2017 | Global priorities for conservation across multiple dimensions of mammalian diversity                                 | multiple | mammal phylogenetic diversity, mammal functional diversity, mammal trait diversity                                                |
| 9  | Buchanan et al. <sup>9</sup>       | 2011 | Identifying priority areas for conservation: A global assessment for forest-dependent birds                          | single   | contribution to forest bird distribution                                                                                          |
| 10 | Buhlmann et al. <sup>10</sup>      | 2009 | A Global Analysis of Tortoise and Freshwater Turtle Distributions with Identification of Priority Conservation Areas | single   | turtle and tortoise richness, turtle and tortoise protection                                                                      |
| 11 | Butchart et al. <sup>11</sup>      | 2015 | Shortfalls and Solutions for Meeting National and Global Conservation Area Targets                                   | multiple | species coverage, ecosystem coverage, key biodiversity areas, gross domestic product                                              |
| 12 | Cantu-Salazar et al. <sup>12</sup> | 2013 | The performance of the global protected area system in capturing vertebrate geographic ranges                        | single   | richness of under protected vertebrates                                                                                           |
| 13 | Cardillo et al. <sup>13</sup>      | 2006 | Latent extinction risk and the future battlegrounds of mammal conservation                                           | single   | richness latent extinction risk in mammals                                                                                        |
| 14 | Carrara et al. <sup>14</sup>       | 2017 | Towards biodiversity hotspots effective for conserving mammals with small geographic ranges                          | multiple | richness range restricted species, richness range restricted evolutionary diversity, richness range restricted threatened species |
| 15 | Ceballos and Ehrlich <sup>15</sup> | 2006 | Global mammal distributions biodiversity hotspots and conservation                                                   | multiple | mammal species richness, mammal endemic species richness, mammal threatened species richness                                      |

|    |                                      |      |                                                                                                                |                    |                                                                                                                                                         |
|----|--------------------------------------|------|----------------------------------------------------------------------------------------------------------------|--------------------|---------------------------------------------------------------------------------------------------------------------------------------------------------|
| 16 | Chen and Peng <sup>16</sup>          | 2017 | Evidence and mapping of extinction debts for global forest-dwelling reptiles, amphibians and mammals           | multiple           | extinction depth mammals, amphibians and reptiles, extinction risk mammals, amphibians and reptiles, richness mammals, amphibians and reptiles          |
| 17 | Cimatti et al. <sup>17</sup>         | 2021 | Identifying science policy consensus regions                                                                   | multiple           | 63 different conservation priority maps                                                                                                                 |
| 18 | Daru et al. <sup>18</sup>            | 2019 | Spatial overlaps between the global protected areas network and terrestrial hotspots of evolutionary diversity | multiple           | phylogenetic diversity, phylogenetic endemism, EDGE                                                                                                     |
| 19 | Di Marco et al. <sup>19</sup>        | 2019 | Wilderness areas halve the extinction risk of terrestrial biodiversity                                         | multiple           | vertebrate persistence, plant persistence, wilderness                                                                                                   |
| 20 | Di Marco et al. <sup>20</sup>        | 2012 | A novel approach for global mammal extinction risk reduction                                                   | single             | extinction risk reduction opportunity                                                                                                                   |
| 21 | Dinerstein et al. <sup>21</sup>      | 2020 | A global safety net to reverse biodiversity loss and stabilize earth climate                                   | multiple           | species rarity, distinct species assemblages, rare phenomena, carbon storage, wildlife corridors                                                        |
| 22 | Freudenberger et al. <sup>22</sup>   | 2013 | Nature conservation Priority-setting needs a global change                                                     | multiple, weighted | 16 variables including carbon storage, vegetation density, species richness vascular plants, functional richness, forest cover loss and human footprint |
| 23 | Funk et al. <sup>23</sup>            | 2010 | Ecoregion prioritization suggests an armoury not a silver bullet for conservation planning                     | multiple           | species richness, endemism, endangerment and threat, ecoregions                                                                                         |
| 24 | Girardello et al. <sup>24</sup>      | 2019 | Global synergies and trade-offs between multiple dimensions of biodiversity and ecosystem services             | multiple, weighted | taxonomic, phylogenetic and functional diversity birds and mammals, carbon sequestration, pollination potential and groundwater recharge                |
| 25 | Goldstein et al. <sup>25</sup>       | 2020 | Protecting irrecoverable carbon in Earth's ecosystems                                                          | single             | manageable carbon, vulnerable carbon, irrecoverable carbon                                                                                              |
| 26 | Gonçalves-Souza et al. <sup>26</sup> | 2020 | Habitat loss extinction and conservation effort in terrestrial ecoregions                                      | multiple           | projected extinction risk, protected area coverage                                                                                                      |
| 27 | Grenyer et al. <sup>27</sup>         | 2006 | Global distribution and conservation of rare and threatened vertebrates                                        | multiple           | bird, mammal and amphibian species richness, endemic richness and threatened richness                                                                   |

|    |                                  |      |                                                                                                                   |          |                                                                                        |
|----|----------------------------------|------|-------------------------------------------------------------------------------------------------------------------|----------|----------------------------------------------------------------------------------------|
| 28 | Gumbs et al. <sup>28</sup>       | 2020 | Global priorities for conservation of reptilian PD in the face of human impacts                                   | multiple | reptile phylogenetic endemism, human impact                                            |
| 29 | Hanson et al. <sup>29</sup>      | 2020 | Global Conservation of species niches                                                                             | single   | species niches                                                                         |
| 30 | Hidasi-Neto et al. <sup>30</sup> | 2015 | Global and local evolutionary and ecological distinctiveness of terrestrial mammals                               | multiple | ecological and evolutionary distinctiveness mammals, threat status                     |
| 31 | Hoekstra et al. <sup>31</sup>    | 2005 | Confronting a biome crisis Global disparities of habitat loss and protection                                      | single   | habitat conversion, habitat protection                                                 |
| 32 | Howard et al. <sup>32</sup>      | 2020 | A global assessment of the drivers of threatened terrestrial species richness                                     | single   | threatened species richness                                                            |
| 33 | Jenkins et al. <sup>33</sup>     | 2013 | Global patterns of terrestrial vertebrate diversity                                                               | multiple | vertebrate richness, endemism and threat                                               |
| 34 | Jetz et al. <sup>34</sup>        | 2014 | Global Distribution and Conservation of Evolutionary Distinctness in Birds                                        | single   | evolutionary distinctiveness birds, threat status, protection coverage                 |
| 35 | Jung et al. <sup>35</sup>        | 2021 | Areas of global importance for conserving terrestrial biodiversity, carbon and water                              | multiple | carbon stock, threatened species, water quality                                        |
| 36 | Kier et al. <sup>36</sup>        | 2009 | A global assessment of endemism and species richness across island and mainland regions                           | single   | bird, mammal. Amphibian, reptile and vascular plant species richness and endemism      |
| 37 | Kullberg et al. <sup>37</sup>    | 2018 | Using KBAs to guide effective expansion of the global PA network                                                  | single   | protection coverage threatened vertebrates, key biodiversity areas                     |
| 38 | Lamoreux et al. <sup>38</sup>    | 2006 | Global tests of biodiversity concordance and the importance of endemism                                           | single   | bird, mammal, amphibian and bird species richness and endemism                         |
| 39 | Loiseau et al. <sup>39</sup>     | 2020 | Global distribution and conservation status of ecologically rare mammal and bird species                          | single   | species richness, ecologically rare species richness, threatened species               |
| 40 | Mazel et al. <sup>40</sup>       | 2014 | Multifaceted diversity-area relationships reveal global hotspots of mammalian species trait and lineage diversity | multiple | mammal species richness, mammal functional diversity, mammal phylogenetic diversity    |
| 41 | McDonald et al. <sup>41</sup>    | 2018 | Conservation priorities to protect vertebrate endemics from global urban expansion                                | multiple | vertebrate endemism, current land cover, urban expansion                               |
| 42 | Myers et al. <sup>42</sup>       | 2000 | Biodiversity hotspots for conservation priorities                                                                 | multiple | endemic species richness, habitat loss                                                 |
| 43 | Mittermeier et al. <sup>43</sup> | 2003 | Wilderness and biodiversity conservation                                                                          | multiple | wilderness, species richness vascular plants, species richness terrestrial vertebrates |

|    |                                |      |                                                                                                                     |          |                                                                                                                                       |
|----|--------------------------------|------|---------------------------------------------------------------------------------------------------------------------|----------|---------------------------------------------------------------------------------------------------------------------------------------|
| 44 | Mokany et al. <sup>44</sup>    | 2020 | Reconciling global priorities for conserving biodiversity habitat                                                   | single   | assemblage intactness, human footprint                                                                                                |
| 45 | Moran et al. <sup>45</sup>     | 2017 | Identifying species threat from global supply chains                                                                | single   | biodiversity footprint, threatened species richness                                                                                   |
| 46 | Naidoo et al. <sup>46</sup>    | 2008 | Global mapping of ecosystem services and conservation priorities                                                    | multiple | carbon sequestration, carbon storage, freshwater provision, grassland production of livestock                                         |
| 47 | Olson et al. <sup>47</sup>     | 2002 | The global 200: Priority ecoregions for global conservation                                                         | multiple | species richness, endemic species richness, unusual higher taxa, unusual ecological phenomena, evolutionary phenomena, habitat rarity |
| 48 | Orme et al. <sup>48</sup>      | 2005 | Global hotspots of species richness are not congruent with endemism or threat                                       | multiple | bird species richness, bird species endemism, bird threatened species richness                                                        |
| 49 | Pelletier et al. <sup>49</sup> | 2018 | Predicting plant conservation priorities on a global scale                                                          | single   | threatened plant species richness                                                                                                     |
| 50 | Pollock et al. <sup>50</sup>   | 2017 | Large conservation gains possible for global biodiversity facets                                                    | multiple | mammal and bird species richness, phylogenetic diversity and functional diversity                                                     |
| 51 | Pouzols et al. <sup>51</sup>   | 2014 | Global PA expansion is compromised by projected land-use and parochialism                                           | multiple | species richness, current protection coverage, projected future land-use                                                              |
| 52 | Riggio et al. <sup>52</sup>    | 2020 | Global human influence maps reveal clear opportunities in conserving Earths remaining intact terrestrial ecosystems | single   | anthromes, human footprint, Low impact areas, Global human modification                                                               |
| 53 | Rodriguez et al. <sup>53</sup> | 2004 | Global gap analysis Priority regions for expanding the global protected-area network                                | multiple | species richness mammals, amphibians, freshwater turtles, tortoises and threatened birds, protected areas                             |
| 54 | Roll et al. <sup>54</sup>      | 2017 | The global distribution of tetrapods reveals a need for targeted reptile conservation                               | single   | species richness reptiles, species richness terrestrial vertebrates                                                                   |
| 55 | Rosauer et al. <sup>55</sup>   | 2017 | Phylogenetically informed spatial planning is required to conserve the mammalian tree of life                       | single   | mammalian phylogenetic diversity, species richness                                                                                    |
| 56 | Safi et al. <sup>56</sup>      | 2013 | Global Patterns of Evolutionary Distinct and Globally Endangered Amphibians and Mammals                             | multiple | evolutionary distinctiveness amphibians and mammals, threat status amphibians and mammals,                                            |

|    |                                   |      |                                                                                                                                 |          |                                                                                                                                                                                                                          |
|----|-----------------------------------|------|---------------------------------------------------------------------------------------------------------------------------------|----------|--------------------------------------------------------------------------------------------------------------------------------------------------------------------------------------------------------------------------|
| 57 | Schipper et al. <sup>57</sup>     | 2008 | The status of the worlds land and marine mammals: Diversity, threat and knowledge                                               | multiple | terrestrial and marine mammal species richness, endemic species, threatened species and phylogenetic diversity                                                                                                           |
| 58 | Soto Navarro et al. <sup>58</sup> | 2020 | Mapping co-benefits for carbon storage and biodiversity to inform conservation policy and action                                | multiple | species richness–area of habitat, rarity-weighted richness–area of habitat, mean species abundance, biodiversity intactness index, biodiversity habitat index, above- and below ground terrestrial carbon storage,       |
| 59 | Stuart et al. <sup>59</sup>       | 2004 | Status and Trends of Amphibian Declines and Extinctions Worldwide                                                               | multiple | species richness, declining species, enigmatic species, habitat loss, over exploitation                                                                                                                                  |
| 60 | Veach et al. <sup>60</sup>        | 2017 | Species richness as criterion for global conservation area placement leads to large losses in coverage of biodiversity          | multiple | species richness vertebrates, threatened species richness vertebrates, endemic species richness vertebrates                                                                                                              |
| 61 | Venter et al. <sup>61</sup>       | 2014 | Targeting global protected area expansion for imperilled biodiversity                                                           | multiple | area protected, opportunity cost, number of species protected                                                                                                                                                            |
| 62 | Voskamp et al. <sup>62</sup>      | 2017 | Global patterns in the divergence between phylogenetic diversity and species richness in terrestrial birds                      | single   | species richness birds, phylogenetic diversity birds                                                                                                                                                                     |
| 63 | Watson et al. <sup>63</sup>       | 2018 | Protect the last of the wild                                                                                                    | single   | remaining wilderness                                                                                                                                                                                                     |
| 64 | Yang et al. <sup>64</sup>         | 2020 | Cost-effective priorities for the expansion of global terrestrial protected areas Setting post 2020 global and national targets | multiple | crisis ecoregions, biodiversity hotspots, endemic bird areas, key biodiversity areas, centres of plant diversity, global 200s, and intact forest landscapes, human footprint, human modification, low human impact areas |

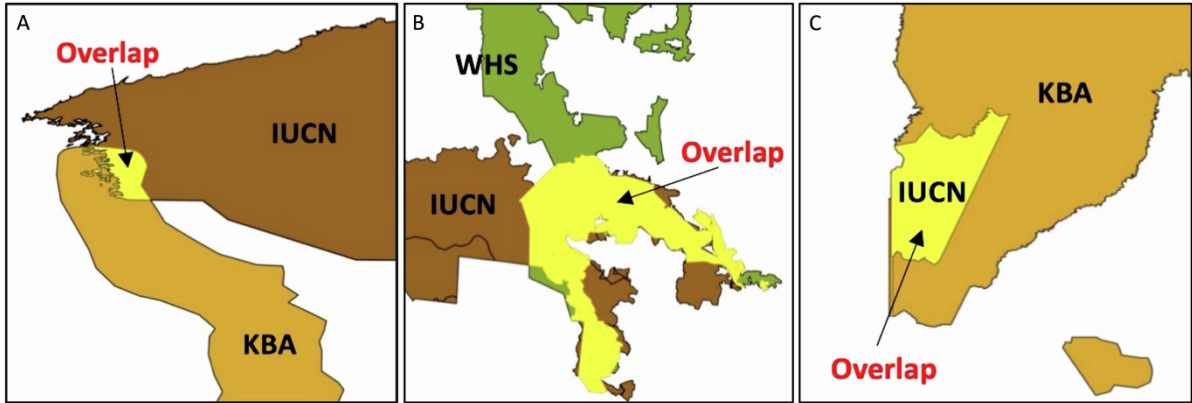

24

25 **Fig. S1:** Examples of marginal, partial and full overlap of two shapefiles. A shows a KBA (orange) that  
 26 has marginal overlap with an IUCN site (brown). B shows a WHS site (green) that partially overlaps  
 27 with an IUCN site but is kept because it is considerably larger than the area already covered by the  
 28 IUCN site. C shows an IUCN site that is embedded within a KBA, here too the KBA is kept because it  
 29 is considerably larger than the IUCN site.

30

31 **Table S2:** Number of sites that had partial, marginal or full overlap with another site included in the  
 32 dataset.

| Overlapping sites | Type of overlap | Number of occasions                |
|-------------------|-----------------|------------------------------------|
| IUCN + KBA        | marginal        | 8                                  |
| IUCN + KBA        | partial         | 2                                  |
| IUCN + KBA        | embedded        | 1                                  |
| IUCN + WHS        | marginal        | 3                                  |
| IUCN + WHS        | embedded        | 1                                  |
| WHS + KBA         | marginal        | 2                                  |
| <b>Total</b>      |                 | <b>17 (1.3% of sites included)</b> |

33

34 **Table S3:** The number of species in each class of terrestrial vertebrates for which phylogenetic data was  
 35 available, and the number of species that were included in the analyses for species richness and  
 36 endemism but which are missing in the phylogenetic endemism analysis. We also give the total number  
 37 of species with distribution data and the corresponding percentage of known species represented in each  
 38 taxon, following the respective taxonomy.

| <b>Taxa</b> | <b>Species w. phylogenetic +<br/>distribution data</b> | <b>Species w. distribution data only</b> | <b>Total</b> | <b>%</b> |
|-------------|--------------------------------------------------------|------------------------------------------|--------------|----------|
| Birds       | 8296                                                   | 1360                                     | 9656         | 86       |
| Mammals     | 4867                                                   | 113                                      | 4980         | 98       |
| Amphibians  | 6051                                                   | 145                                      | 6196         | 98       |
| Reptiles    | 8801                                                   | 1263                                     | 10064        | 87       |

39  
 40 **Table S4:** The number of species in each class of terrestrial vertebrates for which species distribution  
 41 models could be built and which were included in the analyses for climate stability of biodiversity. The  
 42 total species number is the number of species with range maps, we also give the corresponding  
 43 percentage of species with range maps models could be built for (cf. Table S3).

| <b>Taxa</b>         | <b>Species with SDM</b> | <b>Species without SDM</b> | <b>Total</b> | <b>%</b> |
|---------------------|-------------------------|----------------------------|--------------|----------|
| Terrestrial birds   | 8986                    | 896                        | 9882         | 91       |
| Terrestrial mammals | 4307                    | 968                        | 5275         | 82       |
| Amphibians          | 3063                    | 3317                       | 6380         | 48       |
| Reptiles            | 6296                    | 3768                       | 10,064       | 60       |

44

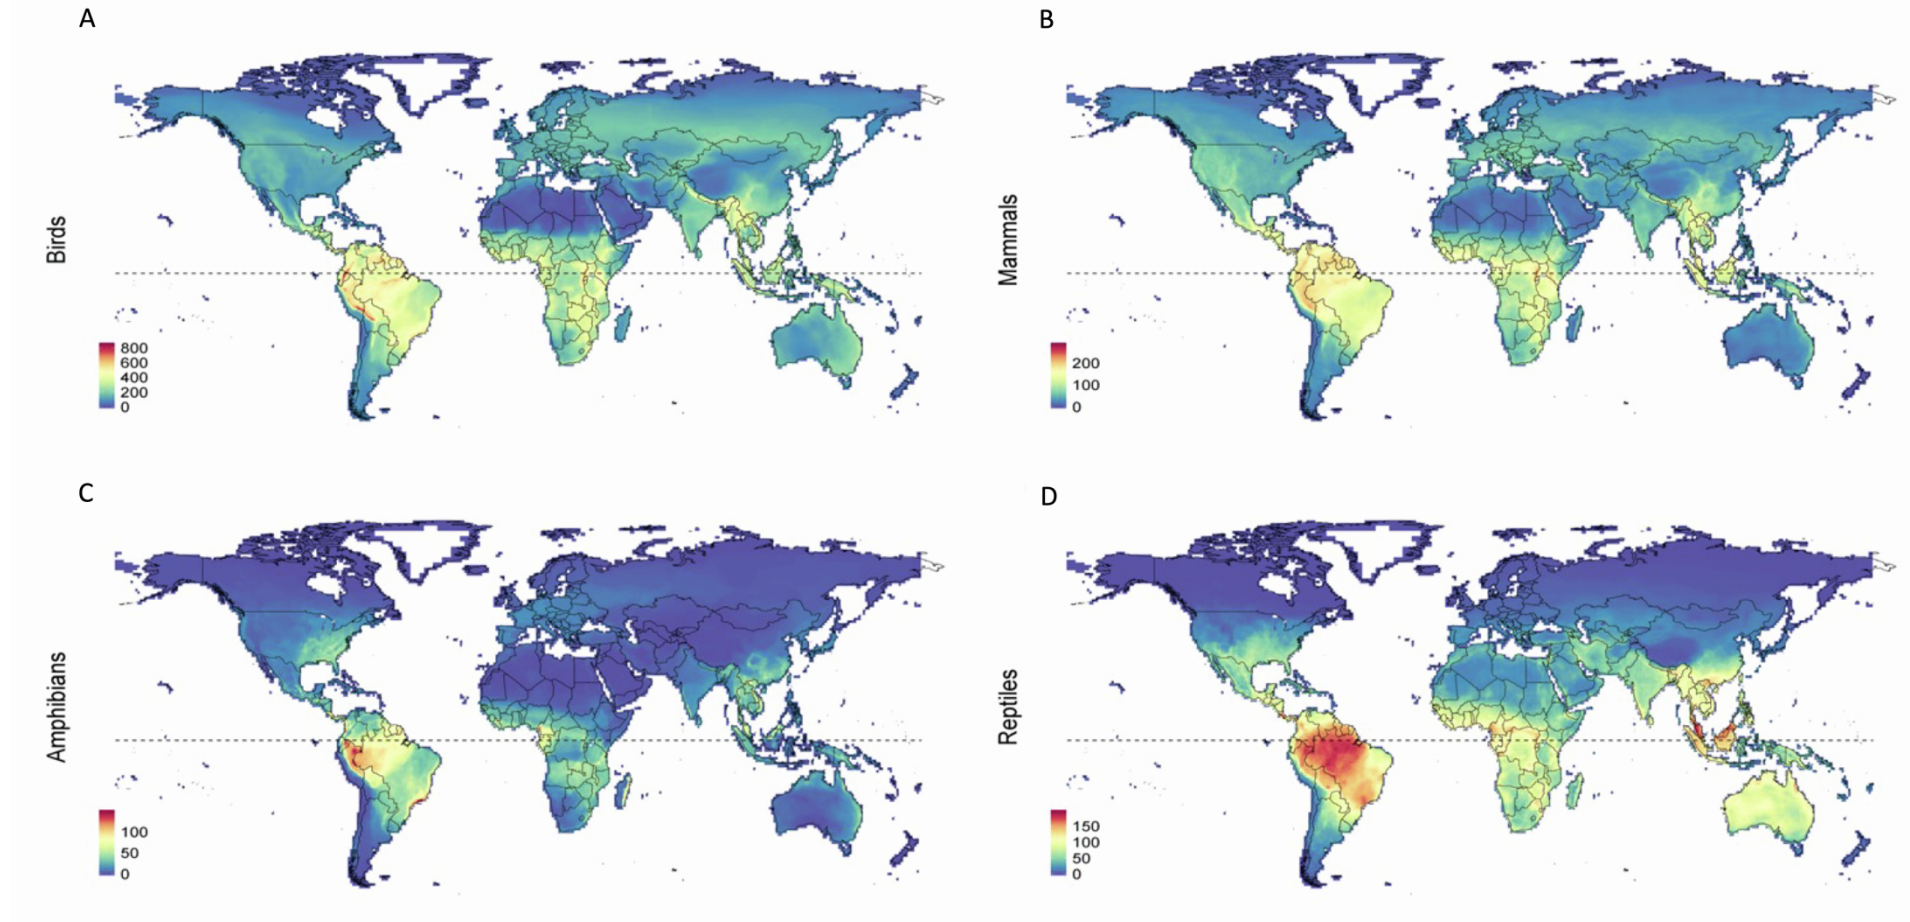

45

46 **Fig. S2:** Global species richness for all four taxa of terrestrial vertebrates (A birds, B mammals, C amphibians and D reptiles), calculated on a 0.5-degree grid. *Note*

47 *that the colour scale extent differs between the different taxa.*



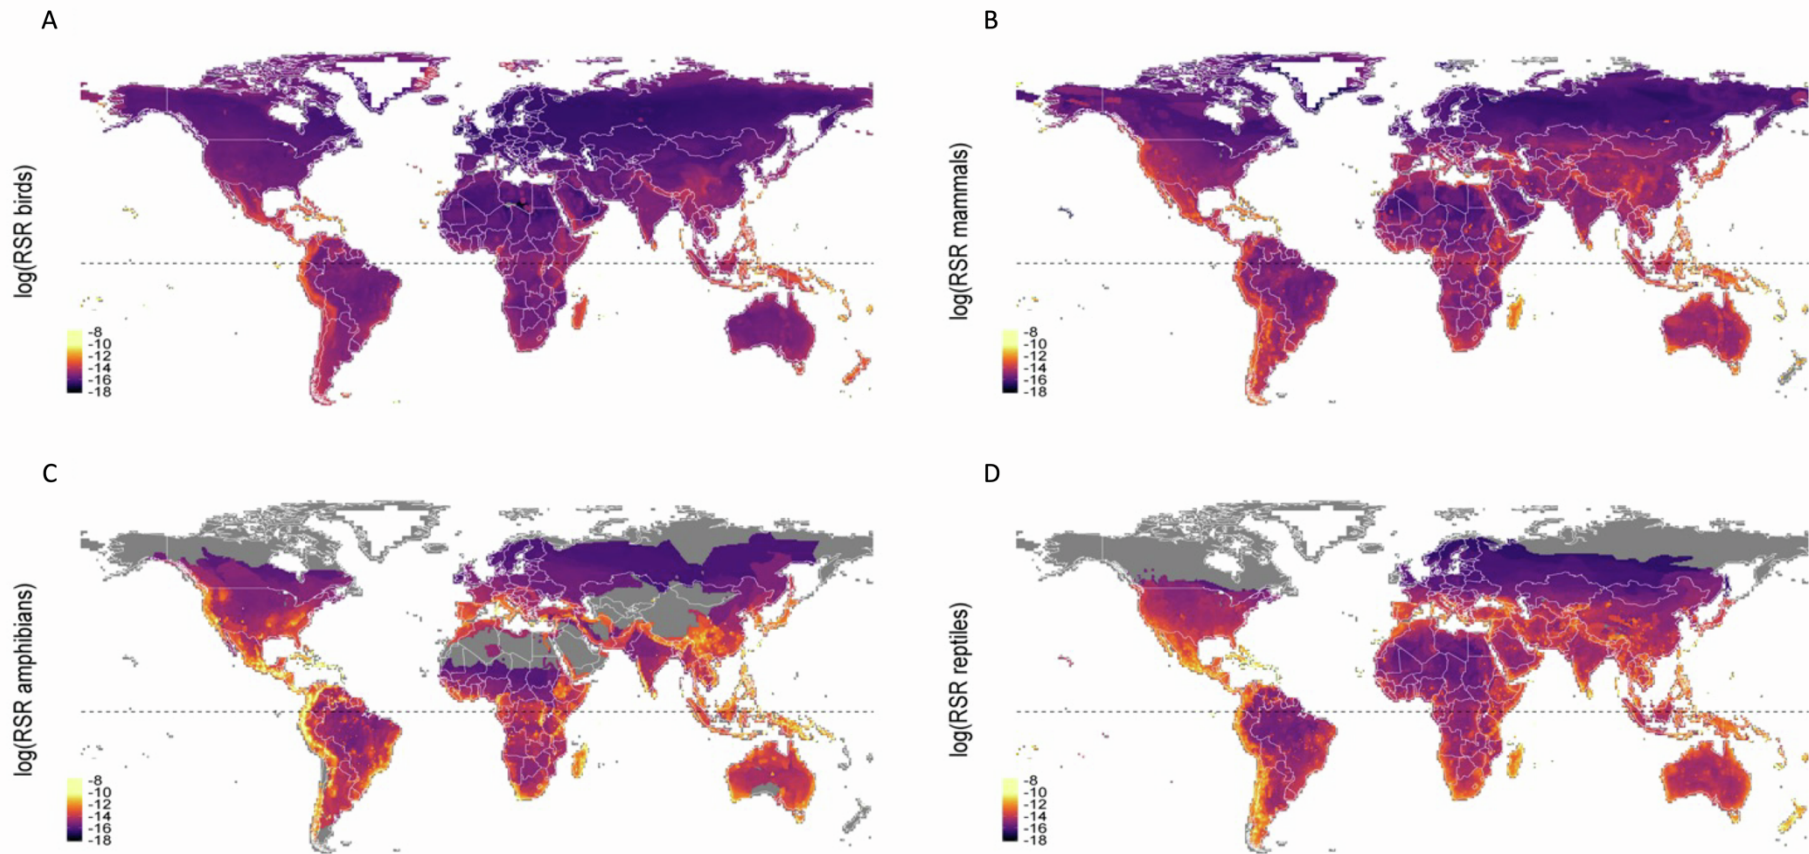

48

49 **Fig. S3:** Global corrected range size rarity for all four taxa (A birds, B mammals, C amphibians and D reptiles), calculated on a 0.5-degree grid. Corrected range  
 50 size rarity is the number of species weighted by their inverse range size and divided by the total number of species, shown here on a logarithmic scale. *Note that*  
 51 *the scale differs between the different taxa.*

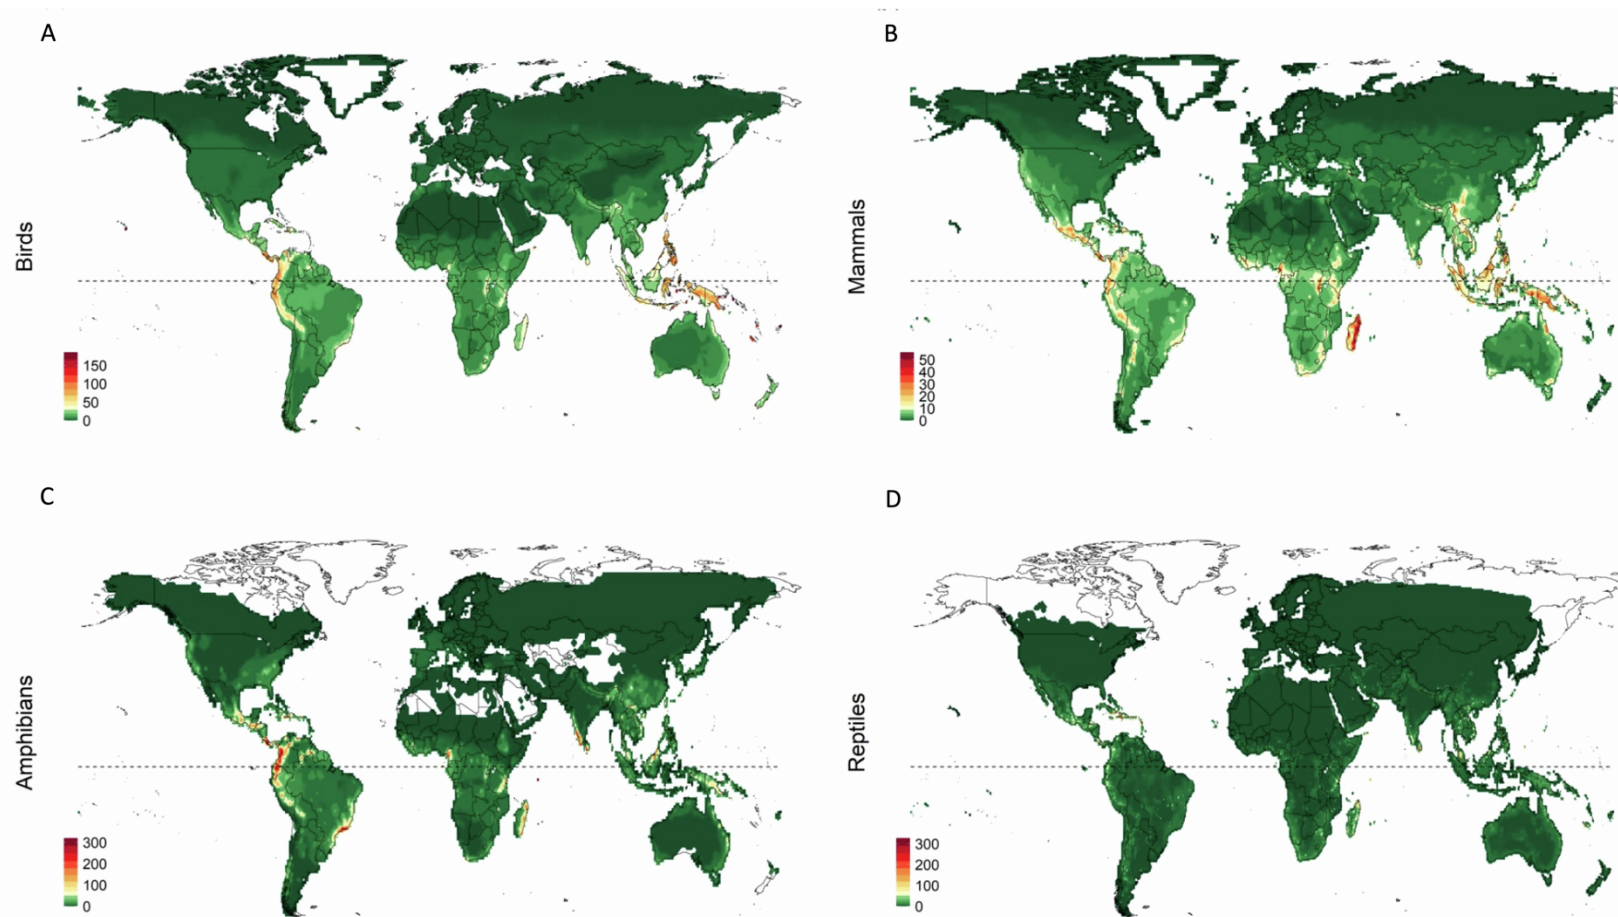

52

53 **Fig. S4:** Global patterns of phylogenetic endemism for all four taxa (A birds, B mammals, C amphibians and D reptiles), calculated on a 0.5-degree grid.

54 Phylogenetic endemism is calculated by summing the shared evolutionary history of a species assemblage and combining it with information on the range extent

55 of the individual species. *Note that the scale differs between the different taxa.*

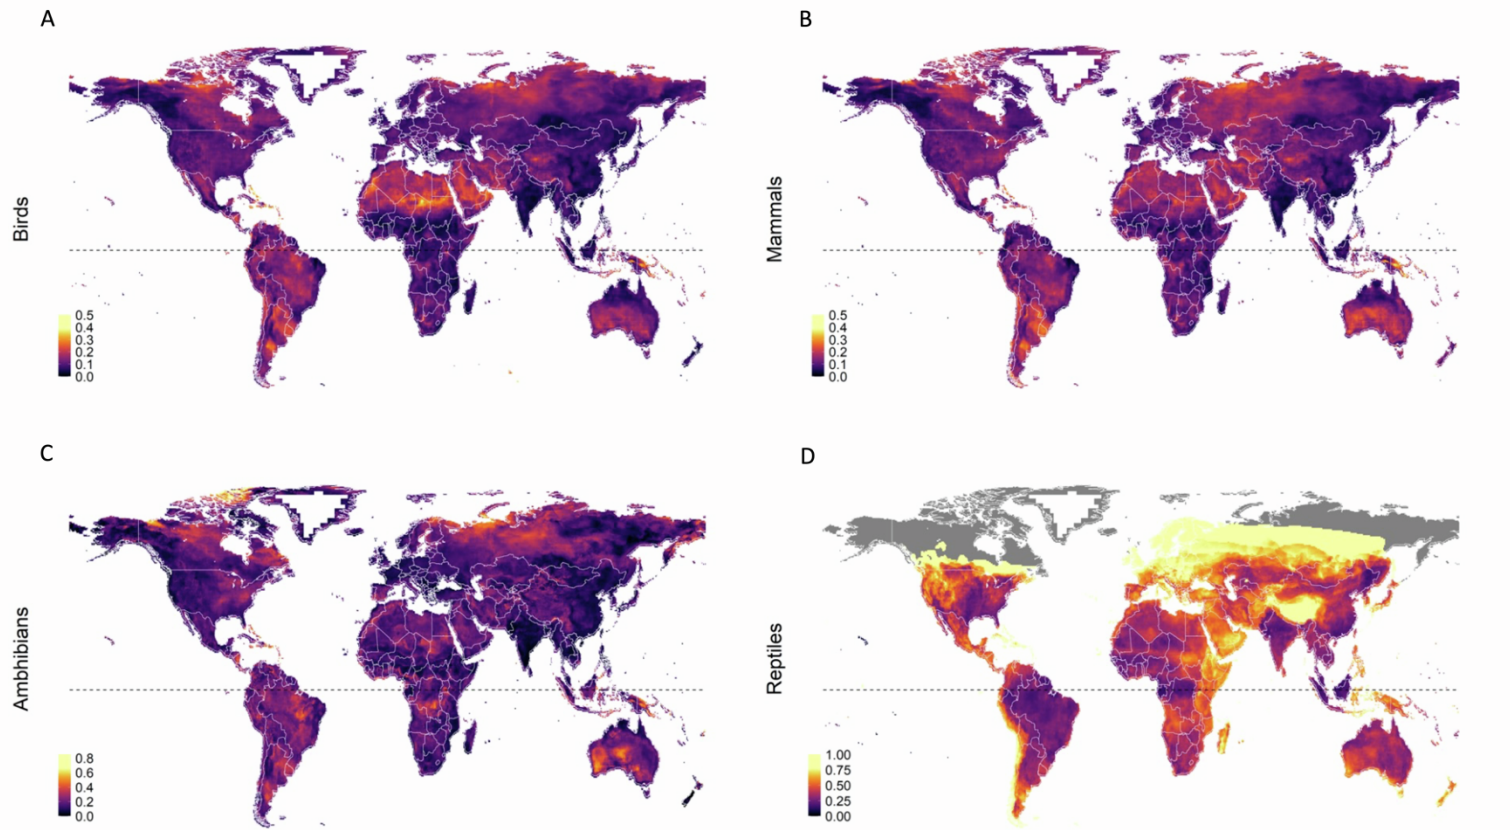

56

57 **Fig. S5:** Projected assemblage-level turnover values under climate change for all four taxa (A birds, B mammals, C amphibians and D reptiles), calculated on a  
 58 0.5-degree grid. Turnover ranges from 0 (low) to 1 (high) and was calculated between the projected current species compositions (1995, average climate projections  
 59 from 1980 – 2009) and the projected future species compositions (2050, average climate projections 2035 - 2064) under a medium emission scenario (RCP 6.0)  
 60 and assuming a medium dispersal scenario. *Note that the scale differs between the different taxa*

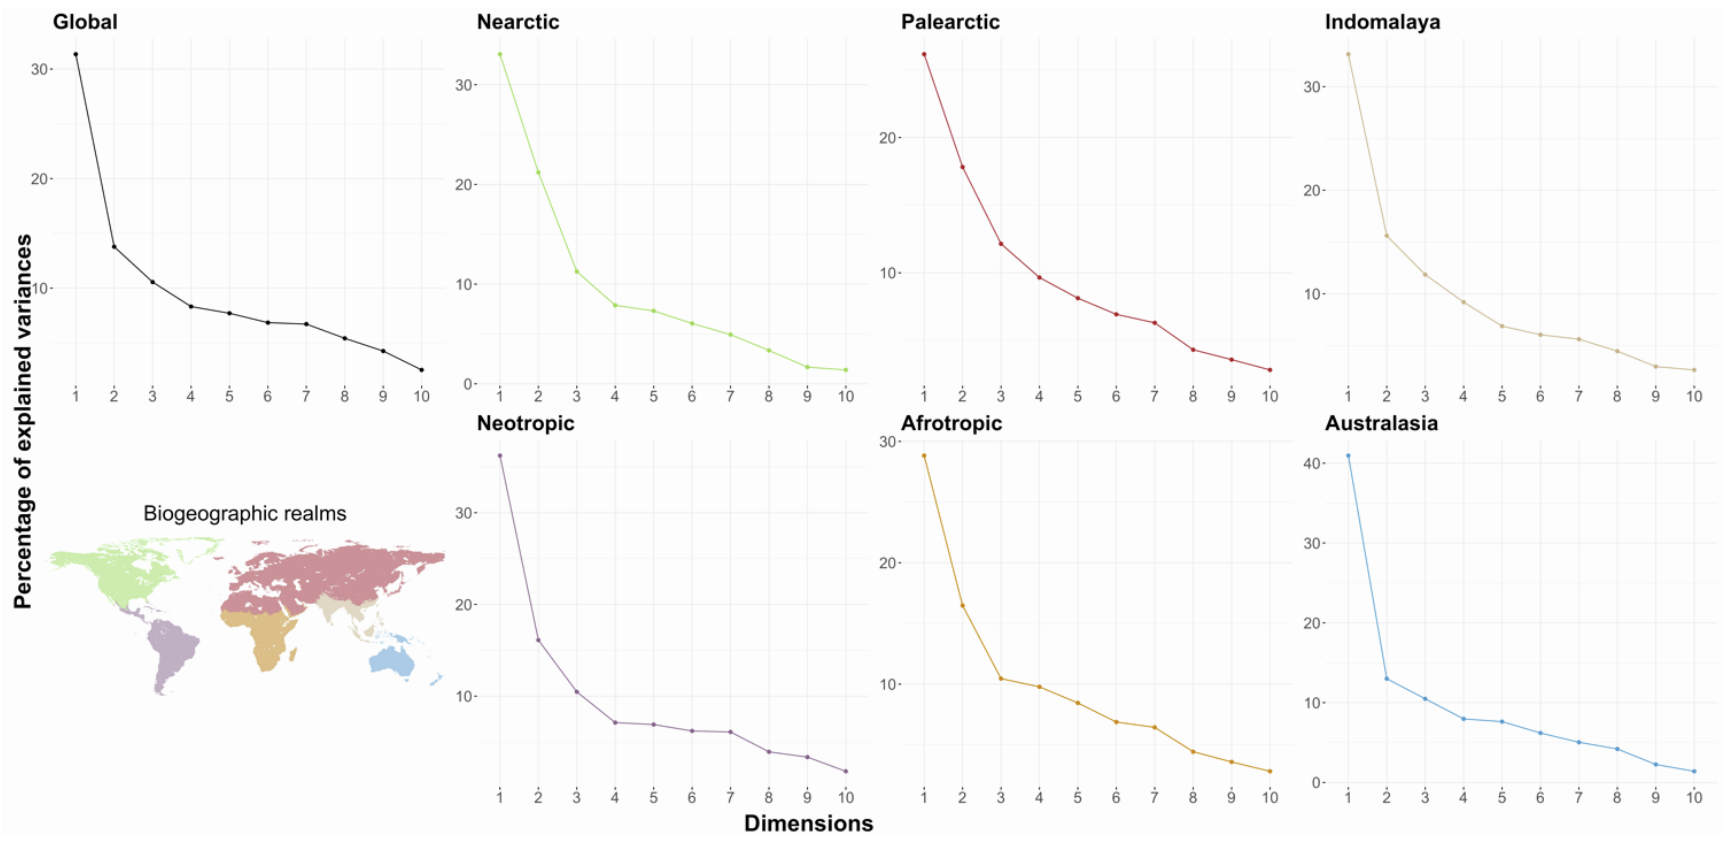

61

62

63 **Fig. S6:** The percentage of variance explained across the different dimensions of the principal components analysis, shown for the global PCA and the realm-wise

64 PCAs.

65

66

## Conservation objectives

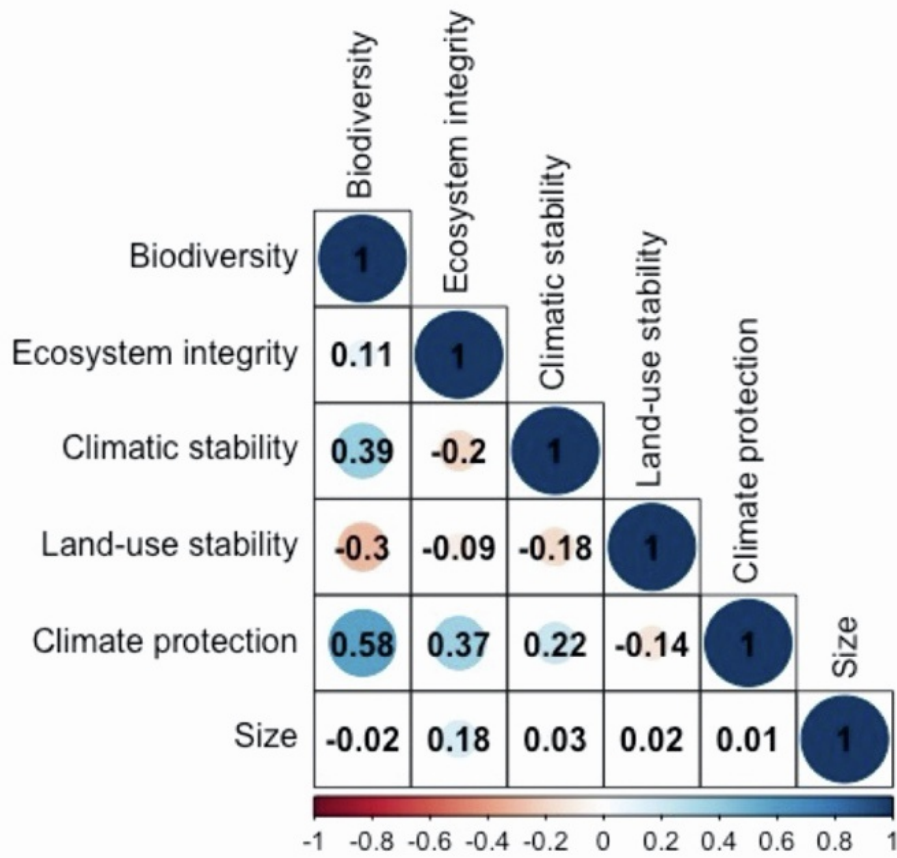

86 **Fig. S7:** Correlation matrix of the different conservation objectives included in the conservation  
 87 decision support tool, n=1347.

### Biodiversity

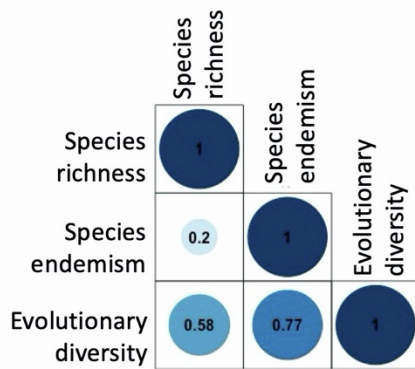

### Ecosystem Integrity

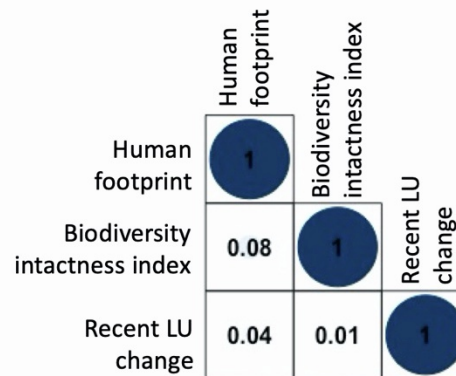

### Climate protection

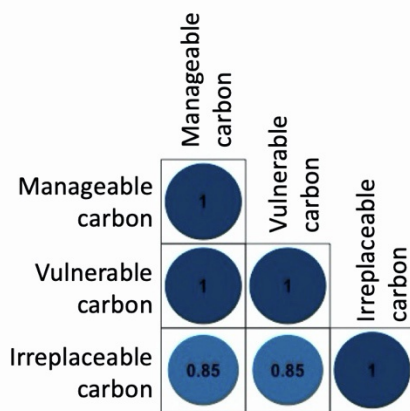

### Climatic stability

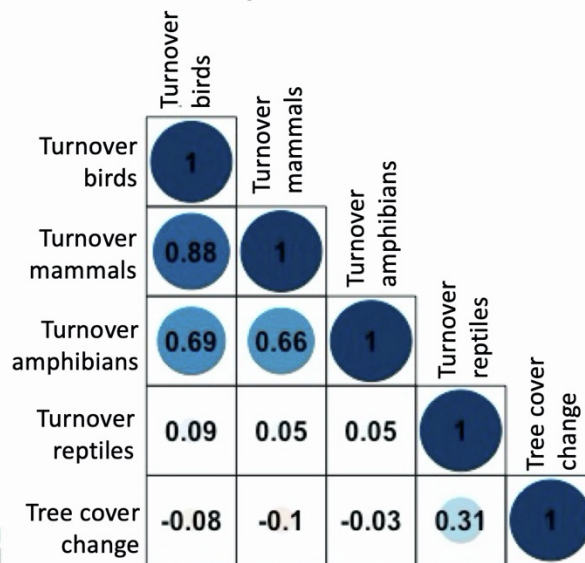

#### Correlation

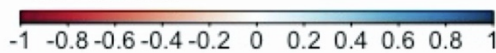

88

89 **Fig. S8:** Correlation matrix of the different indicators included in the biodiversity, ecosystem integrity,  
 90 climate protection and climatic stability, n=1347.

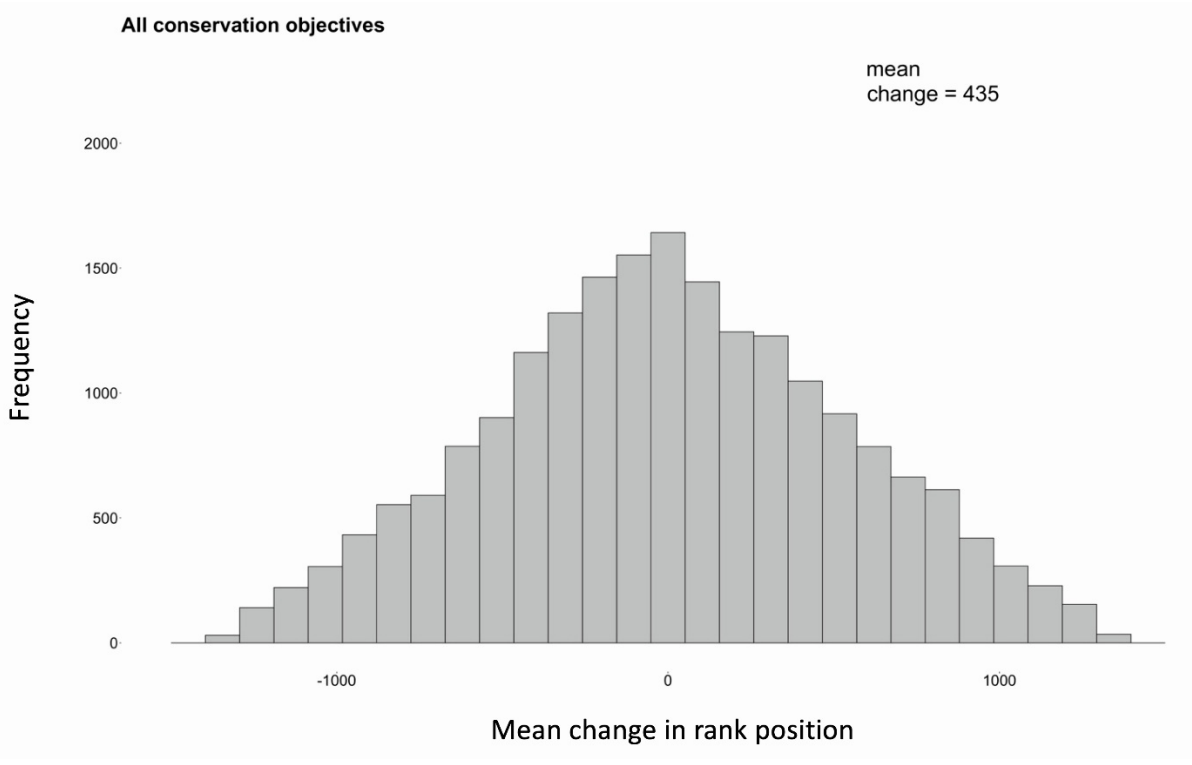

91

92 **Fig. S9:** Mean change in rank positions across all sites for the six different conservation objectives. To  
 93 assess the mean change in rank position, all sites were ranked for each conservation objective  
 94 individually and the average change in rank position per site was compared across the individual  
 95 rankings.

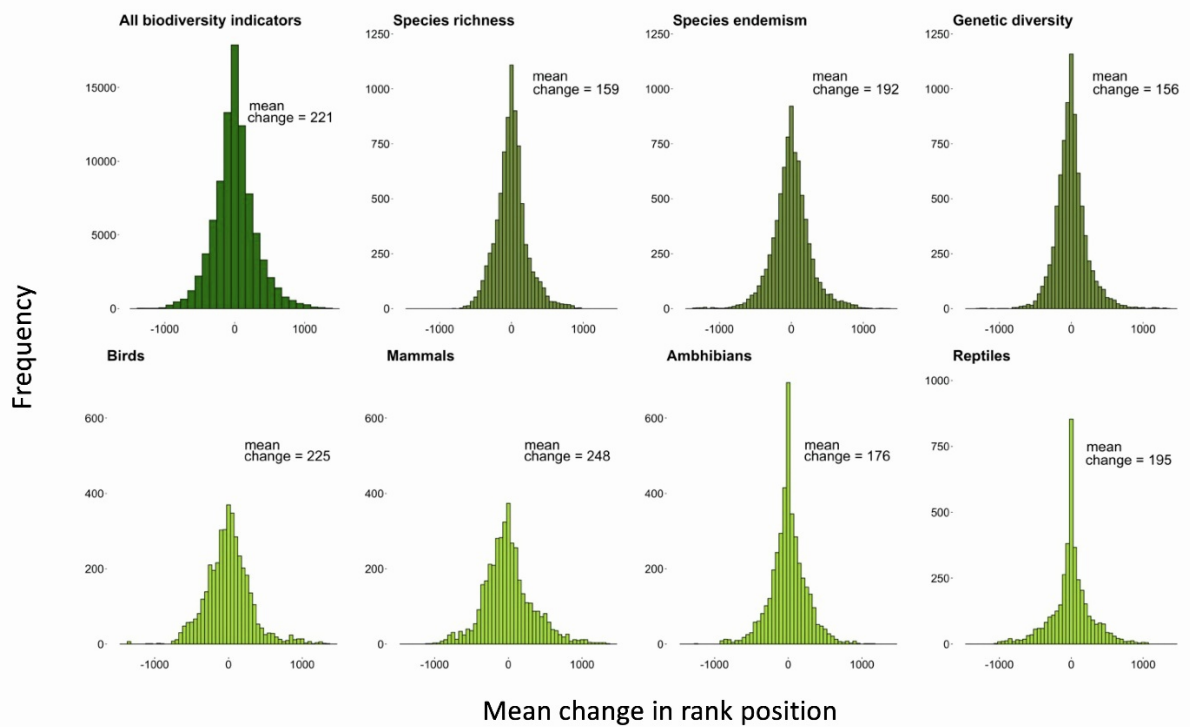

96

97 **Fig. S10:** Mean change in ranking position across all sites compared for all biodiversity indicators, for  
 98 the three individual biodiversity indicators across all taxa and for the four taxa compared across all  
 99 biodiversity indicators. To assess the mean change in rank position, all sites were ranked for each  
 100 indicator and taxa individually and the average change in rank position per site was compared across  
 101 the individual rankings (i.e. To assess the average change in rank position for species richness (SR) only,  
 102 four rankings were compared: SR birds; SR mammals; SR; amphibians and SR reptiles. Subsequently  
 103 the average change in rank position per site was calculated and plotted).



104

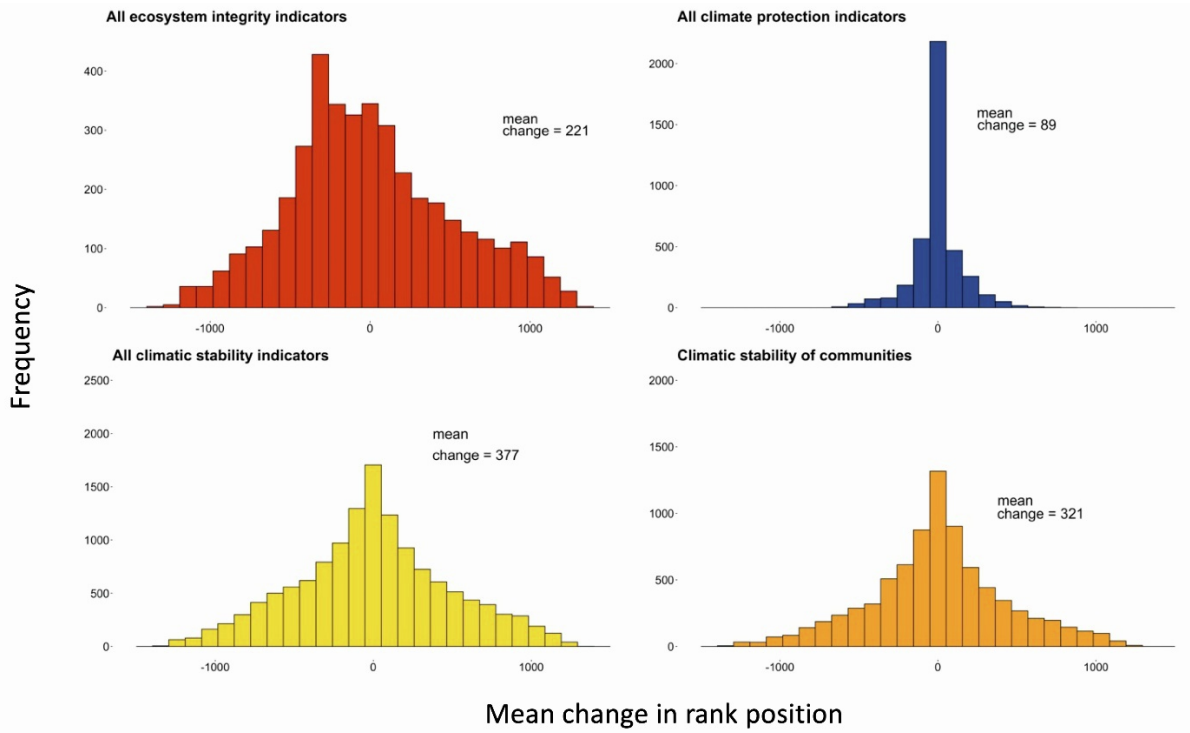

105

106 **Fig. S11:** Mean change in ranking position across all sites compared for all ecosystem integrity, climate  
107 protection and climatic stability. For climate stability the change in rank position across all indicators  
108 (climatic stability of species communities and change in forest cover) is shown in the bottom left graph  
109 and the change in rank position for climatic stability of species communities, considering the four  
110 included taxa individually, in the bottom right graph.

111

112 **Conservation priority setting**

113 Please fill in the table below with a weighting of the different conservation strategies we introduced  
 114 in the webinar session today. The weighting should be given from the perspective of your work  
 115 sector. The weights should be allocated in the Legacy Landscapes context rather than based on other  
 116 goals (e.g. regional or local development goals).

117 Weights allocated to the different conservation strategies should sum up to 100%. See example table  
 118 in Figure1.

119 *By filling in this questionnaire, you agree that the data will be analyzed in anonymous form for a*  
 120 *scientific publication.*

| Name | Biodiversity | Wilderness | Climatic stability | Land-use stability | Climate protection | Large size |
|------|--------------|------------|--------------------|--------------------|--------------------|------------|
| ...  | 100%         | 0%         | 0%                 | 0%                 | 0%                 | 0%         |
| ...  | 50%          | 50%        | 0%                 | 0%                 | 0%                 | 0%         |
| ...  | 50%          | 0%         | 50%                | 0%                 | 0%                 | 0%         |
| ...  | ...          | ...        | ...                | ...                | ...                | ...        |

121 122 *Figure 1: Example weighting table*

123 **Question 1.** Please fill in the weighting table from the perspective of your work sector, using  
 124 percentages. Please use 5 percent intervals (e.g. 5%, 10%, 15%). If you filled in 'Other', please specify  
 125 below the table.

126  
 127

128

| Biodiversity | Wilderness | Climatic stability | Land-use stability | Climate protection | Large size | <i>Other</i> |
|--------------|------------|--------------------|--------------------|--------------------|------------|--------------|
|              |            |                    |                    |                    |            |              |

129

130 If you filled in 'Other' please specify:

131 **Question 2.** Please (briefly) explain the motivation behind your weighting:

132

133 **Question 3.** Do we miss any important indicators within the six different conservation objectives (see  
134 Figure 1)? Please list:

135 **Question 4.** Do we miss any (macro ecological) conservation objectives in the Legacy Landscapes  
136 context (see Figure 1)? Please list:

137 **Question 5.** Which is the main work sector you would assign yourself to? Please choose one:

138 *Academia:*

139 *NGO:*

140 *Consultancy:*

141 *Government:*

142 *Other:*

143 *If other please specify:*

144 **Question 6.** Please identify your work place nationality (If you like to):

145 **Question 7.** Please identify your gender (m/f/d) (If you like to):

146 **Fig. S12:** The Questionnaire used during the workshop

147

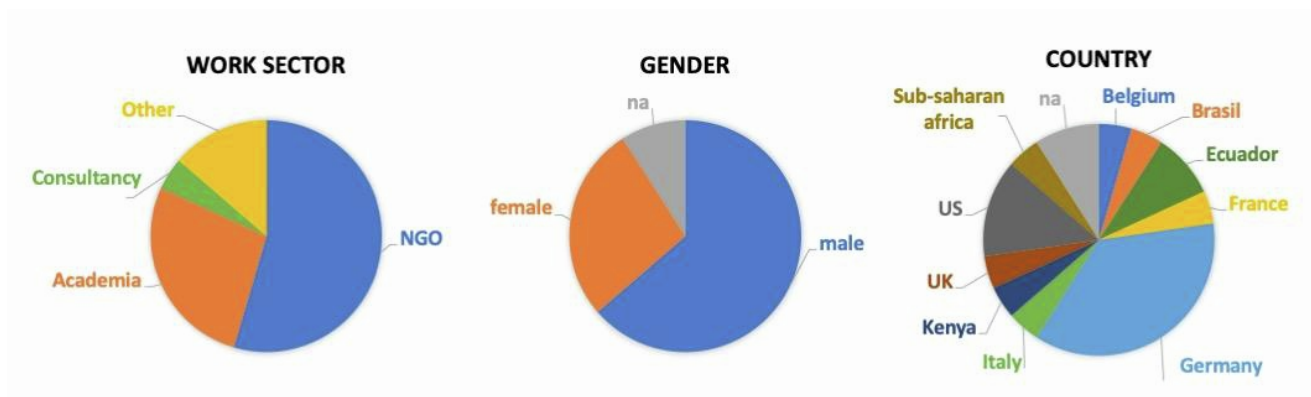

148 **Fig. S13:** Anonymous participant data for all workshop attendants who responded to the questionnaire.

149

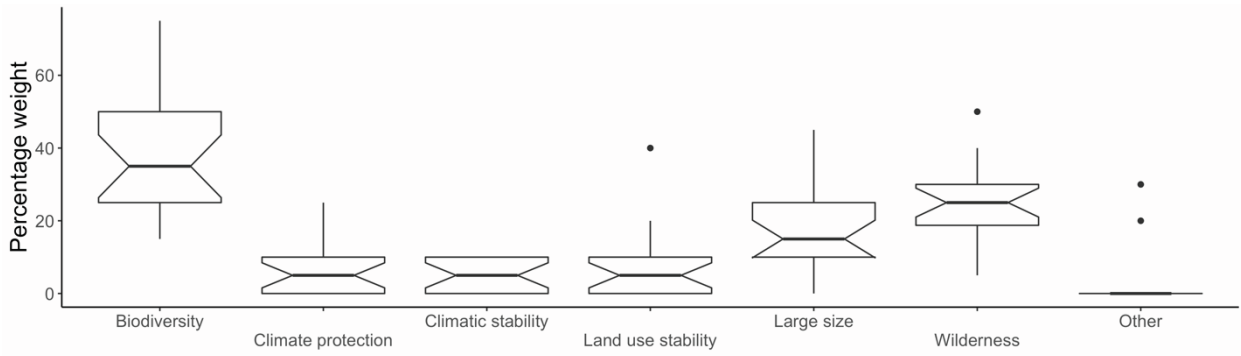

150 **Fig. S14:** Responses to Q1 by all attendants who filled in the questionnaire. Weights were allocated in  
 151 5 percent intervals to the individual objectives. Combined weights for all conservation objectives  
 152 allocated per person summed up to 100 percent. Other included governance, ecosystem loss rate and  
 153 socio-economic factors.

154

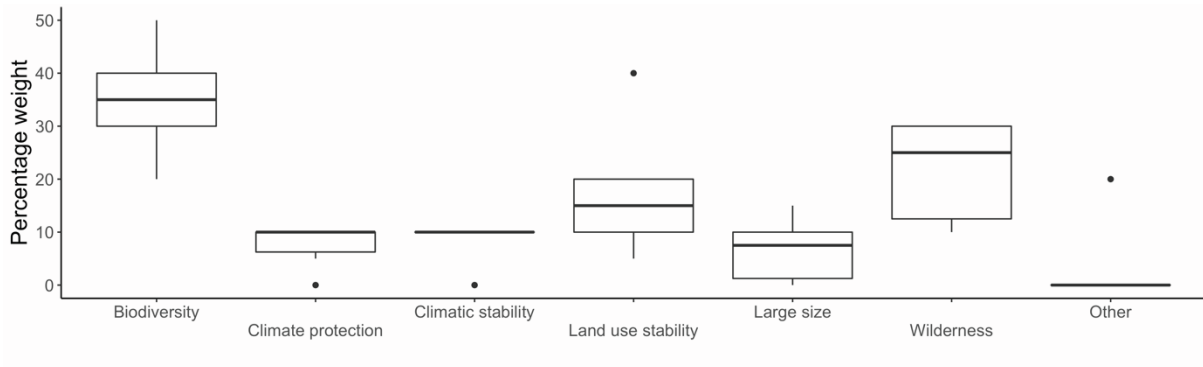

155

156 **Fig. S15:** Responses to Q1 by all attendants who described they work sector as academia. Weights were  
 157 allocated in 5 percent intervals to the individual objectives. Combined weights for all conservation  
 158 objectives allocated per person summed up to 100 percent (Other included socio-economic factors).

159

160

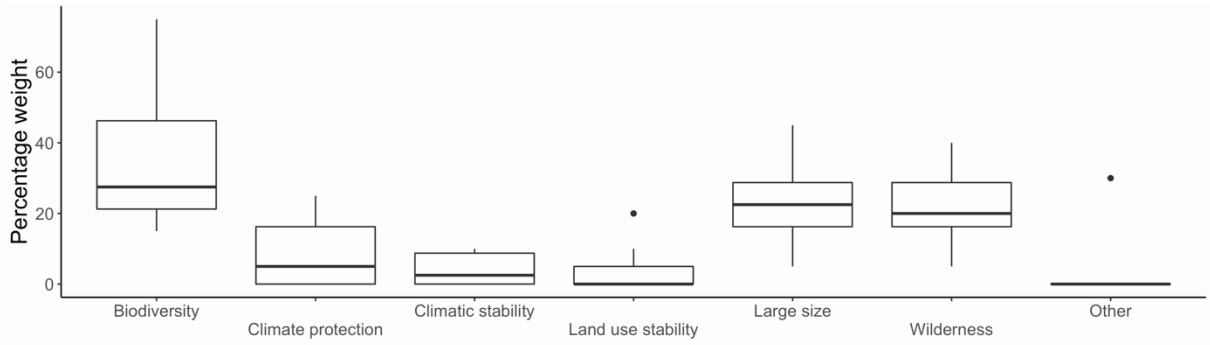

161

162 **Fig. S16:** Responses to Q1 by all attendants who described their work sector as NGO. Weights were  
163 allocated in 5 percent intervals to the individual objectives. Combined weights for all conservation  
164 objectives allocated per person summed up to 100 percent (Other included governance and ecosystem  
165 loss rate).

166 **Note S2: The decision support tool**

167 The decision support tool was developed to allow easy access to the different biogeographic datasets. It  
168 consists of four tabs and a settings panel on the left-hand sites which are described below:

169

**SET PRIORITIES**

Here you can define the settings for the site selection, by using the sliders and buttons below. Follow these steps to evaluate the sites based on your priorities:

1. Weigh the objectives
2. Select global or realm ranking
3. Set to ODA subset (if applicable)
4. Check the *Site evaluation* & *Site map* tabs
5. Print evaluation report

More details on using the app can be found under the *How to use* tab

**Weigh the objectives**

Use the sliders to change the importance of the different conservation objectives in the site ranking.

*The colour code indicates the expected error margin, ranging from green (high certainty) to red (uncertain). An objective can be left out of the site evaluation by leaving its slider at 0.*

**Note that combined allocated weights of the different conservation objectives always sum up to 100%.**

**Biodiversity**  1

**Ecosystem integrity**  1

**Climatic stability**  1

**Land-use stability**  1

**Climate protection**  1

**Size**  1

*The percentage weight allocated to the different conservation objectives can be seen in the table below.*

| Resulting weight    |    |
|---------------------|----|
| Biodiversity        | NA |
| Ecosystem integrity | NA |
| Climatic stability  | NA |
| Land-use stability  | NA |
| Climate protection  | NA |
| Size                | NA |

**Select focal realm**

- Global
- Afrotropic
- Australasia
- Indomalaya
- Nearctic
- Neotropic
- Palearctic

**Select official development assistance (ODA) countries (coming soon)**

**Download report of the evaluation results (coming soon)**

**Fig. S17:** The settings panel. The brief step by step instruction at the top gives a summary on how to use the conservation decision support tool.

The sliders allow users to manually adjust the weighting of the individual conservation objectives (top).

The resulting allocated percentages can be seen in the tables below the sliders (center).

Below the weights table the user can select if sites should be selected globally or for a specific realm.

With the “Select focal realm” button users can choose between evaluating sites globally or for one specific realm (bottom).

The “Select official development assistance” button allows us to subset if all sites should be included in the evaluation or if only sites located in ODA countries should be included (bottom).

The “Generate report” button allows downloading the generated evaluation based on the manually set weights and the selection of region and sites (bottom).

## Setting global priorities for longterm conservation

Background Conservation objectives Site evaluation Site map How to use

### The decision support tool

The establishment and maintenance of protected areas (PAs) is viewed as a key action in delivering post 2020 biodiversity targets and reaching the sustainable development goals. PAs are expected to meet a wide range of objectives, ranging from biodiversity protection to ecosystem service provision and climate change mitigation. As available land and conservation funding are limited, optimizing resources by selecting the most beneficial PAs is therefore vital.

This decision support tool enables a flexible approach to PA selection on a global scale, which allows different conservation objectives to be weighted and prioritized. It is meant to facilitate a first evaluation of the potential of PAs for long term conservation before following up with detailed on the ground assessments of the candidate sites.

The current version of the decision support tool contains a set of 1347 PAs. The included PAs were selected as a case study subset based loosely on the criteria of the Legacy Landscapes Fund.

### Legacy Landscapes Fund

Legacy Landscapes is a new international public-private initiative, led by the German Government, to develop and implement a conservation and financing strategy for the safeguarding of selected protected areas. The Legacy Landscapes Fund has a terrestrial focus and will significantly contribute to the post-2020 Biodiversity-Framework of the COP 15 at the CBD in 2021.

### The Legacy Landscapes Fund concept is based on three pillars:

1. Permanent, stable and performance-based **funding** ensured by a combination of private donors and public funds of about one million \$ per site per year.
2. Effective and efficient **management** that will be carried out in cooperation with national authorities, local communities and an NGO, with the annual disbursement of funds being controlled by an independent platform, and based on the fulfillment of certain indicators, the key performance indicators.
3. Strategic site selection, based on the **biogeography** of the site.

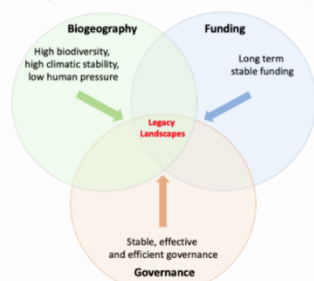

Figure 1: The three cornerstones of the Legacy Landscapes Fund concept

This decision support tool has been developed in cooperation between the Frankfurt Zoological Society and the Senckenberg Biodiversity and Climate Research Centre to support the selection of suitable sites for the Legacy Landscapes Fund. The tool enables the comparison of potential sites based on macro-ecological variables and thus falls under the Biogeography cornerstone of the Legacy Landscapes Fund concept. It facilitates the ranking of sites based on their performance across six different conservation objectives:

**Biodiversity, Ecosystem integrity, Climatic stability, Land-use stability, Climate protection and Size.**

### Contact

alke.voskamp@senckenberg.de

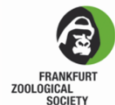

Frankfurt Zoological Society

SENCKENBERG  
world of biodiversity

Senckenberg Biodiversity and Climate Research Centre

211 Fig. S18: The “Background” tab of the conservation decision support tool. Here the user finds a brief introduction to the tool and its purpose.



**The conservation objectives**

Six conservation objectives were selected to enable the comparison of protected areas and evaluate their potential for long term conservation based on macroecological data. The objectives were chosen to allow a first assessment based on the size of the site, the biodiversity it contains, its intactness and its potential for future persistence. Each of the conservation objectives is measured based on one or more macro-ecological variables as described below:

**Biodiversity:** includes the richness, endemism and evolutionary diversity of species comprising four different taxa (mammals, birds, reptiles and amphibians)

**Ecosystem integrity:** includes the Biodiversity Intactness Index (BII), the human footprint and the observed change from biome to anthrome (change from natural to human modified landcover) in the area over the past 20 years

**Climatic stability:** includes the projected impacts of climate change on the stability of ecological communities (mammals, birds, reptiles and amphibians) and the change in tree cover by the mid of the century under a medium warming scenario

**Land-use stability:** includes the projected change in land-use in the buffer zone around the site

**Climate protection:** includes the amount of baseline, vulnerable and irrecoverable carbon storage within the site, indicating the contribution of the site to climate protection by binding carbon dioxide.

**Size of the site:** is the extent of the site in km<sup>2</sup>

The six different conservation objectives can be combined into different conservation goals as laid out in the figure below. Using the sliders on the left the conservation objectives can be combined by allocating a weight to each objective. Objectives allocated a weight of 0 are excluded from the weighting. The resulting ranking based on the selected objectives and the allocated importance (weight) can be seen in the **Site evaluation** tab. The location of the top scoring sites can be seen in the **Site Map** tab.

*Details on the included variables and data sources and can be found in the text box at the bottom of the page.*

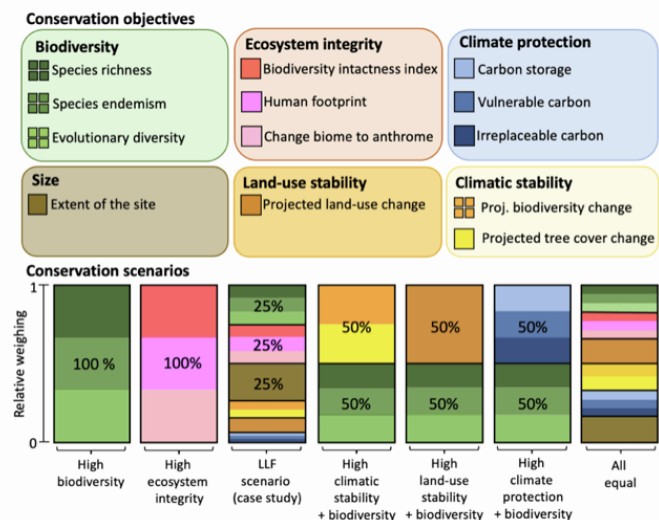

**Figure 2: Conservation objectives and strategies** The six different conservation objectives Biodiversity, Ecosystem integrity, Climatic stability, Land-use stability, Climate protection and Size can be combined into different conservation scenarios. These conservation scenarios allow to weigh the different conservation objectives against each other, to set priorities when evaluating sites for conservation.

212

213 **Fig. S19:** The “Conservation objectives” tab gives the user an overview over the six conservation objectives included in the conservation decision support tool and  
 214 the indicators they consist of. At the bottom of the tab the user can find a PDF that explains the included data in greater detail (the content of the PDF can be found  
 215 below under *Details on the conservation objectives*).

Site evaluation based on weighted objectives

The ranking table shows the overall ranking of the potential sites based on the applied weights. The values for the different conservation objectives are scaled across all sites included in the ranking. The values range from 0 to 1, with 0 being allocated to the site with the lowest score and 1 being allocated to the site with the highest score for the conservation objective. The scaled ranks are shown for each conservation objective, for each site on the right hand side of the table and remain the same independent of the weighting. This means the scaled value that a site has for a certain conservation objective indicates the overall ranking position of that site for that objective, as the following example shows:

**If the weights for 'Biodiversity' and 'Ecosystem integrity' are both set to 50%, you will see that the 'Talamanca Range' is the top site. This is because it has the second highest biodiversity among the included sites, with a 'Biodiversity' score of 0.99. But it also has a clear human footprint, indicated by the 'Ecosystem integrity' score of 0.71. In comparison the combined site 'Manu - Alto Purus' ranks third globally with a very good 'Biodiversity' score of 0.70 but additionally it is also very pristine with a very high 'Ecosystem integrity' score of 0.93.**

The ranking table can be adjusted by using the sliders on the left hand side. Allocating different weights to the individual objectives will change the ranking of the sites. Using the **Select focal realm** buttons above the table, the ranking table can be subset to show the resulting ranking for the individual realms or across all sites globally.

Show  entries

Search:

| Rank | Realm          | International Name                | Biodiversity | Ecosystem integrity | Climatic stability | Land-use stability | Climate protection | Size        |
|------|----------------|-----------------------------------|--------------|---------------------|--------------------|--------------------|--------------------|-------------|
| 1    | 1 Australasia  | Lorentz                           | 0.607396086  | 0.80230815          | 0.548465231        | 0.654322973        | 0.834105246        | 0.073520033 |
| 2    | 2 Australasia  | Telefomin                         | 0.607252524  | 0.912244933         | 0.537948473        | 0.685210529        | 0.810333302        | 0.006225128 |
| 3    | 3 Australasia  | Wet Tropics of Queensland         | 0.520467601  | 0.741410564         | 0.807227266        | 0.889916118        | 0.263765134        | 0.027954551 |
| 4    | 4 Australasia  | Enarotali                         | 0.507679885  | 0.819943063         | 0.576880068        | 0.658567367        | 0.796953488        | 0.008785558 |
| 5    | 5 Australasia  | Pegunungan Wayland                | 0.446090326  | 0.865420475         | 0.61295482         | 0.658441202        | 0.862794401        | 0.00430076  |
| 6    | 6 Australasia  | Pegunungan Tamrau Selatan         | 0.419463833  | 0.885203088         | 0.784841706        | 0.625291729        | 0.860900299        | 0.014886721 |
| 7    | 7 Australasia  | Girringun                         | 0.407186504  | 0.67611454          | 0.858131928        | 0.896210488        | 0.26227229         | 0.008657429 |
| 8    | 8 Australasia  | Pegunungan Tokalekaju             | 0.365977228  | 0.776801303         | 0.571428877        | 0.593722704        | 0.569596224        | 0.012244087 |
| 9    | 9 Australasia  | Gondwana Rainforests of Australia | 0.345034756  | 0.689581806         | 0.834040409        | 0.803964452        | 0.373084456        | 0.011536259 |
| 10   | 10 Australasia | Bogani Nani Wartabone             | 0.324413688  | 0.676782772         | 0.674263254        | 0.642144486        | 0.572940405        | 0.008879256 |

Showing 1 to 10 of 1,345 entries

Previous  2 3 4 5 ... 135 Next

216

217 **Fig. S20:** The “Site evaluation” tab shows the evaluation results based on the set weights and selected region and type of sites (ODA or not) in a table. Sites are  
 218 ranked from performing best to least under the respective settings.

### Location of the selected sites

The map shows the location of the top sites ranked by their suitability based on the applied weights across the six conservation objectives. Depending on the selection the map shows either the top 30 sites globally or the top 10 sites for a selected biogeographic realm. For full table of all sites see the **Site evaluation** tab

The small green points show the locations for all sites included in the analysis. The large red, orange and yellow points show the location of the top sites with red indicating the sites of highest suitability.

The choice of biogeographic realm can be changed by using the **Select focal realm** button in the panel on the left.

### Location top 30 sites Global

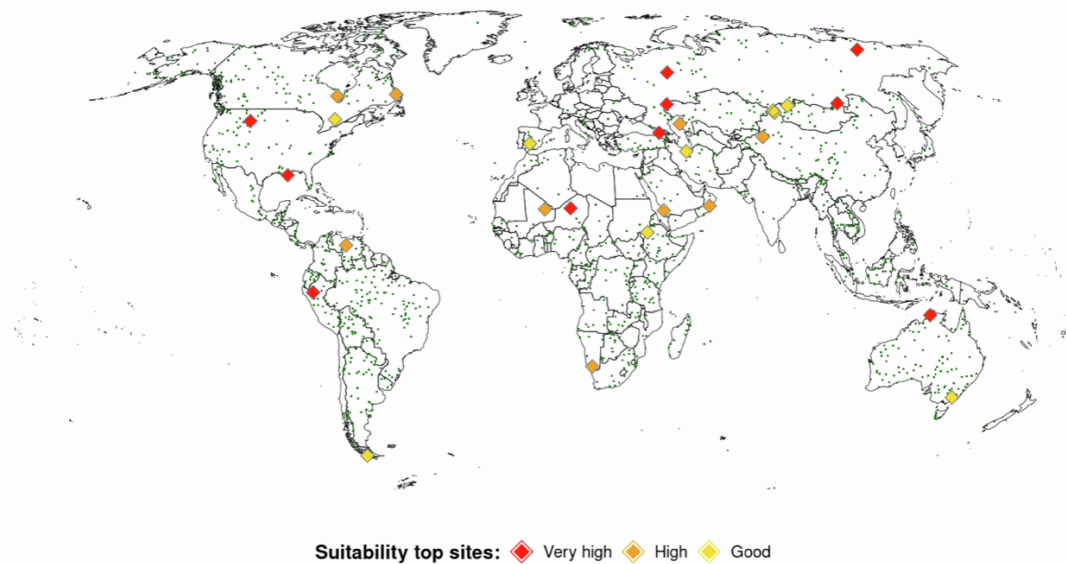

*The country borders displayed in this map are derived from Natural Earth (version 4.1.0) and do not imply the expression of any opinion concerning the legal status of any country, area or territory or of its authorities, or concerning the delamination of its borders.*

219

220 **Fig. S21:** The “Site map” tab shows the spatial distribution of the top 30 sites based on the set weights and selected region and type of sites (ODA or not).

#### Using the decision support tool for site evaluation

A short step by step instruction can be found at the top of the side panel on the left. Following these instructions the sites included in the decision support tool can be compared based on six different conservation objectives:

**Biodiversity:** includes the richness, endemism and evolutionary diversity of species comprising four different taxa (mammals, birds, reptiles and amphibians)

**Ecosystem integrity:** includes the Biodiversity Intactness Index (BI), the human footprint and the observed change from biome to anthrome (change from natural to human modified land cover) in the area over the past 20 years

**Climatic stability:** includes the projected impacts of climate change on the stability of ecological communities (mammals, birds, reptiles and amphibians) and the change in tree cover by the mid of the century under a medium warming scenario

**Land-use stability:** includes the projected change in land-use in the buffer zone around the site

**Climate protection:** includes the amount of baseline, vulnerable and irrecoverable carbon storage within the site, indicating the contribution of the site to climate protection by binding carbon dioxide.

**Size of the site:** is the extent of the site in km<sup>2</sup>

A more detailed description of the six conservation objectives and the included indicators can be found at the bottom of the **Conservation objectives** tab.

#### Interpreting the evaluation results

The different conservation objectives are underly different sources of uncertainty, which need to be taken into account when using the decision support tool and interpreting the evaluation results. See text box below for a brief description of the uncertainty associated with each conservation indicator.

221

222 **Fig. S22:** At the bottom of the tab the user can find a PDF with more detailed instructions and information on how to interpret the results and the uncertainty around  
223 the different objectives (the content of the PDF can be found below under *How to use the conservation decision support tool*)

224 .

## 225 User manual decision support tool

226 To help users understand the datasets underlying the decision support tool and enable them to use the  
227 tool to evaluate sites for conservation, the tool includes a brief description of the included data and a  
228 user manual.

229

### 230 *Details on the conservation objectives*

#### 231 *The site data*

232 The sites currently included in the conservation decision support tool are all registered sites under either  
233 one or more of the following criteria:

- 234 ● a protected area from the global world database in protected areas <sup>65</sup> that is listed by the  
235 International Union for Conservation of Nature (IUCN) in either category I or II,
- 236 ● a natural World Heritage Site (WHS),
- 237 ● a Key Biodiversity Area (KBA).

238 The shapefiles for the IUCN protected areas as well as the World Heritage Sites were derived from  
239 protected planet <sup>65</sup>. The Shapefiles for the KBAs were derived from BirdLife International <sup>66</sup>.

#### 240 *The conservation objectives data*

241 The six different conservation objectives which are included in the decision support tool are biodiversity,  
242 ecosystem integrity, climatic stability, land-use stability, carbon storage and size. Each of these  
243 objectives consists of one or several underlying macro-ecological indicator variables. See below for a  
244 detailed description of the variables included within each of the six conservation objectives and how  
245 these variables are derived (*Shorter and simpler explanations can be found under the tab “How to use”*).

#### 246 *Biodiversity*

247 The biodiversity objective includes three different variables, the total number of species, the degree of  
248 endemism and the evolutionary diversity of the species occurring in the region the site is located in.

##### 249 *Species richness*

250 The species richness, for four taxa of vertebrates, is derived from range maps for virtually all  
251 species of the four terrestrial vertebrate taxa: from the BirdLife International for birds <sup>67</sup>, the  
252 IUCN for mammals and amphibians <sup>68</sup>, and from GARD for reptiles <sup>54</sup>.

253 *Sites with a higher species richness are allocated a higher suitability for long-term conservation*  
254 *than sites with a lower species richness.*

255 *Endemism*

256 To capture biodiversity that is unique to a region, a measure for the prevalence of range  
257 restricted (endemic) species within the region is used. Species endemism is estimated by  
258 calculating weighted range size rarity, which is the sum of the inverted range extents of all  
259 species, divided by the number of species occurring in a site <sup>69</sup>.

260 *Sites with a higher rate of species endemism are allocated a higher suitability for long-term*  
261 *conservation than sites with a lower rate of species endemism.*

262 *Evolutionary diversity*

263 Evolutionary diversity is included to have an estimate of how evolutionary unique the species  
264 within a region are. Measures of evolutionary diversity can give an idea of how much  
265 evolutionary history is stored within a set of species. A high amount of evolutionary history  
266 might imply a high feature diversity across the species within the region and could, arguably,  
267 make a community more resilient to disturbance. Evolutionary diversity is calculated using  
268 phylogenetic endemism (PE), which is a combined measure of evolutionary history and the  
269 uniqueness of a species community. PE identifies regions with high numbers of evolutionary  
270 isolated and geographically restricted species. In addition to summing the shared evolutionary  
271 history of a species assemblage, PE also incorporates the spatial restriction of phylogenetic  
272 branches covered by the assemblage <sup>70</sup>.

273 *Sites with a higher evolutionary diversity are allocated a higher suitability for long-term*  
274 *conservation than sites with a lower evolutionary diversity.*

275 *Ecosystem Integrity*

276 The ecosystem integrity objective includes three different variables, the biodiversity intactness index  
277 (BII), the human footprint in and around the site and the change from biome to anthrome in the past  
278 two decades.

279

280

281 Biodiversity intactness index (BII)

282 The BII presents the modeled average abundance of present species, relative to the abundance  
283 of these species in an intact ecosystem<sup>71</sup>. This means the index gives an indication of how much  
284 species abundances in a region have already changed due to anthropogenic impacts e.g. land-  
285 use change. For the BII we are using the global map of the Biodiversity Intactness Index  
286 calculated by Newbold et al (2016).

287 *Sites with a higher estimated biodiversity intactness are allocated a higher suitability for long-*  
288 *term conservation than sites with a lower biodiversity intactness.*

289 Human footprint

290 As a measure of how pristine the sites still are, a measure of the human footprint within the  
291 region is included. Estimates of the human footprint within sites are derived from the  
292 standardised human footprint layer by Venter et al (2016), which includes data on the extent  
293 of built environments, crop land, pasture land, human population density, night-time lights,  
294 railways, roads and navigable waterways.

295 *Sites with a lower human footprint are allocated a higher suitability for long-term conservation*  
296 *than sites with a higher human footprint.*

297 Land-use change

298 To derive past changes in the land cover of a site we calculated the average percentage change  
299 across the site from biomes (natural vegetation cover) to anthromes (human-modified land cover  
300 such as rainfed cropland, irrigated cropland, mosaic cropland, mosaic natural vegetation and  
301 urban areas). The fraction of land cover classes time series, ranging from 1992 – 2018, was  
302 obtained from the GEOEssential project<sup>72</sup>.

303 *Sites with a lower percentage of land-use change are allocated a higher suitability for long-*  
304 *term conservation than sites with a higher percentage of land-use change.*

305 Climatic stability

306 The climatic stability objective consists of two different variables: the projected stability of animal  
307 biodiversity and the projected tree cover change under future climate change.

308

309 Climatic stability of biodiversity

310 To estimate the climatic stability of a site we are looking at the potential impacts of climate  
311 change on the biodiversity within the site. Climate change is driving shifts in species  
312 distributions and it is well established that many taxa are shifting their ranges towards higher  
313 latitudes and elevations. But also, idiosyncratic species responses to climate change have been  
314 observed. These heterogeneous range shifts have the potential to reshuffle species assemblages,  
315 which can have highly unpredictable impacts on species interactions and ecosystem functions  
316 (e.g., changes in prey predator relationships or competition). We assume that species  
317 assemblages that are not predicted to change a lot in future or experience large species losses  
318 are under less risk from climate change than species assemblages that experience a lot of  
319 reshuffling. Therefore, we include projected turnover in species under future climate change as  
320 an indicator for the climatic stability of biodiversity. Projections of species ranges are derived  
321 from species distribution models (see Hof et al 2018 for a detailed description of the modelling).  
322 For each site all species that are projected to occur there currently and/or in future (2050) are  
323 extracted. The turnover is then calculated between the current and future species assemblage of  
324 a site, using the formula for Bray Curtis dissimilarity <sup>73</sup>.

325 *Sites with higher climatic stability (i.e., a lower projected turnover in species) are allocated a*  
326 *higher suitability for long-term conservation than sites with a lower climatic stability.*

327 Forest cover change

328 We included the projected change in tree cover derived from the LPJ-GUESS process-based  
329 dynamic vegetation-terrestrial ecosystem model <sup>74</sup>. The climate input for the model was  
330 derived from the ISIMIP2b simulations, described above under climatic stability of  
331 biodiversity. The projected change of tree cover is calculated as the average percentage  
332 change projected to occur within the site.

333 *Sites with a lower change in the projected tree cover are allocated a higher suitability for long-*  
334 *term conservation than sites with a higher change in projected tree cover.*

335

336



337 *Land-use stability*

338 To assess the potential impacts of projected future land-use change we used predictions of the change  
339 in pastures, croplands and biofuel croplands in the buffer zone around the sites (50 km buffer), excluding  
340 the site itself.

341 *Projected land-use change*

342 Projected land–use change is derived from simulations of current and future land-use, based on  
343 global land-use change models, using the assumptions of population growth and economic  
344 development as provided by ISIMIP2b and described in Frieler et al. (2017). The used land-use  
345 change models<sup>75,76</sup> account for climate impacts (e.g., on crop yields) and were driven with the  
346 same climate input as the species distribution models used to derive climatic stability of  
347 biodiversity (see above). The land-use scenarios provide percentage cover of six different land-  
348 use types (urban areas, rainfed crop, irrigated crop, pastures, as well as rainfed and irrigated  
349 bioenergy crops). We averaged annual land-use data for each of two different time periods (1995  
350 and 2050), across the four GCMs (see above under Climatic stability), and calculated a  
351 combined value of average land-use change for the buffer zone around each site.

352 *Sites with a lower projected increase in land-use in the buffer zone are allocated a higher*  
353 *suitability for long-term conservation than sites with a higher projected increase in land-use in*  
354 *the buffer zone.*

355 *Carbon storage*

356 The carbon storage objective includes three different variables, using the three dimensions of ecosystem  
357 carbon stocks as defined by Goldstein et al. (2020). These include the amount of manageable carbon  
358 stocks that currently exist but could be influenced in principle by human actions, the amount of  
359 vulnerable carbon stocks that currently exist and will be released if land-use changes and the amount of  
360 irrecoverable carbon stocks in a site.

361 *Manageable carbon*

362 As an indicator for the climate protection capacity, we used the estimated amount of manageable  
363 carbon as provided by Noon et al (2021). This layer includes the amount of carbon stored in the  
364 above and below ground vegetation as well as soil organic carbon stocks up to 30 cm depth, or

365 up to 100 cm within inundated soil, as these depths are most relevant to common disturbances  
366 <sup>25</sup>. We derived the average amount of carbon in t per ha for each site.

367 *Sites with higher baseline carbon stocks are allocated a higher suitability for long-term*  
368 *conservation than sites with lower baseline carbon stocks.*

369 Vulnerable carbon

370 Vulnerable carbon is defined by Goldstein et al (2020) as the amount of the manageable carbon,  
371 described above, that is likely to be released through typical land conversion in an ecosystem.  
372 We derived the average amount of vulnerable carbon in t per ha for each site.

373 *Sites with higher vulnerable carbon stocks are allocated a higher suitability for long-term*  
374 *conservation than sites with lower vulnerable carbon stocks.*

375 Irrecoverable carbon

376 Irrecoverable carbon is defined as the amount of the vulnerable carbon, described above, that if  
377 it is lost through typical land conversion actions, cannot be recovered over the following 30  
378 years <sup>25</sup>. We derived the average amount of irrecoverable carbon in t per ha for each site.

379 *Sites with higher irrecoverable carbon stocks are allocated a higher suitability for long-term*  
380 *conservation than sites with lower irrecoverable carbon stocks.*

381 *Large size*

382 For the extent of the area, we preselected sites that are larger than 2000 km<sup>2</sup>, based on the precondition  
383 that Legacy Landscapes should have a minimum size to maintain a viable ecosystem.

384 Extent of the site

385 The area in km<sup>2</sup> is derived from the site polygons provided by protected planet <sup>65</sup> or the Key  
386 Biodiversity Area (KBA) database <sup>66</sup>.

387 *Larger sites are allocated a higher suitability for long-term conservation than smaller sites.*

388 *How to use the conservation decision support tool*

389 The conservation decision support tool is meant to facilitate global or realm wise comparisons of sites  
390 based on macroecological datasets. The spatial scale of the included datasets enables the user to compare  
391 a vast number of sites globally based on the six different conservation objectives. Nevertheless, two  
392 important points need to be kept in mind when using the decision support tool and interpreting the  
393 evaluation results.

394 *Large-scale comparison, not local assessment*

395 Firstly, due to the coarse resolution of most globally available datasets the decision support tool  
396 facilitates a first evaluation of the included sites but *should not be used for local assessments*. This  
397 means that for the selection of specific areas for conservation and the practical implementation of nature  
398 conservation on the ground requires further evaluation steps that a tool like this cannot cover. These  
399 further steps should involve an on-site assessment based on additional parameters at a higher resolution  
400 (e.g. more detailed biological data acquired through surveys and observations). For a final decision, it  
401 is also crucial to consider non-biological characteristics, ranging from available infrastructure, NGO  
402 presence, political situation, access to the site and potential funding possibilities to socio-economic  
403 factors.

404 *Underlying data uncertainty varies among objectives*

405 Secondly, the different indicator datasets included within the six conservation objectives come with  
406 different levels of uncertainty and error margins, which affects the resulting ranking. These varying error  
407 margins should be kept in mind when interpreting the results. For example, a ranking of sites based  
408 exclusively on the biodiversity objective is less prone to errors, because the global patterns of species  
409 richness and diversity are well-known and unlikely to change substantially in the near future at the used  
410 spatial scale. In contrast, the climatic stability objective is based on modelling of future biodiversity  
411 responses to climate change, which are sensitive to human societal and political decisions and need to  
412 be regularly updated with ongoing developments and new knowledge; therefore, the ranking of sites  
413 based exclusively on the climatic stability objective is more prone to errors and could change in the  
414 future. *We have therefore colour-coded the sliders for the individual objectives in the panel on the left*  
415 *based on the expected error margin, ranging from green (high certainty) via yellow (intermediate*

416 certainty) to **red** (uncertain). An objective can be left out entirely of the site evaluation by leaving its  
417 slider at 0. Below we briefly describe the underlying main sources of uncertainty that should be  
418 considered with each conservation objective.

419 *Biodiversity objective: **Low error margin***

420 This objective consists of three conservation indicators:

- 421 ● species richness is the number of species occurring in the region the site is located in and is  
422 derived from species range polygons provided by BirdLife International (birds <sup>67</sup>), IUCN  
423 (mammals, amphibians <sup>68</sup>) or GARD (reptiles <sup>54</sup>).
- 424 ● endemism is the range size rarity across all species occurring within the site.
- 425 ● evolutionary diversity is calculated using phylogenetic endemism (PE), which is a combined  
426 measure of evolutionary history and the uniqueness of a species community. PE identifies areas  
427 with high numbers of evolutionary isolated and geographically restricted species.

428 The base data for these indicators are globally available species range maps for virtually all species in  
429 the four classes of terrestrial vertebrates (mammals, birds, reptiles, and amphibians) and, for  
430 evolutionary diversity, phylogenies that describe how species are related to each other. The observed  
431 indicator patterns are well-known and therefore stable at the global scale and unlikely to introduce high  
432 amounts of uncertainty into the site evaluation, although we acknowledge that the individual species  
433 range maps are only rough representations of where species actually occur and should therefore not be  
434 used for local assessments. Similarly, some uncertainty exists in the phylogenetic tree. Due to the coarse  
435 nature of the range maps, the resulting species numbers for the individual sites should be interpreted as  
436 the number of species occurring within the region where the site is located, not as the exact number of  
437 species known to occur within the site.

438 *Ecosystem integrity objective: **Intermediate error margin***

439 The ecosystem integrity objective includes three conservation indicators with differing error margins:

- 440 ● The biodiversity intactness index (BII) connects modelled land-use pressures on biodiversity  
441 with locally observed biodiversity data from the PREDICTS project. There are several sources  
442 of uncertainty associated with this modelling approach, including the quality of the underlying  
443 biodiversity data and the modelling approach itself. We therefore consider the error margin for

444 this conservation indicator as higher compared to e.g. the indicators included in the biodiversity  
445 or size objective, but not as high as the completely modelled indicators such as climatic stability.  
446 Details on the BII can be found in Newbold et al 2016.

- 447 ● The human footprint (HFP) within the sites was estimated using the data of Venter et al (2016).  
448 The standardized HFP provided by the source data includes the extent of built environments,  
449 cropland, pasture land, human population density, night-time lights, railways, roads and  
450 navigable waterways. Data included in the footprint dates partially back to 2009 and might not  
451 reflect recent developments within and around the actual sites. Therefore, we consider the error  
452 margin for this indicator to be higher compared to e.g. the indicators included in the biodiversity  
453 or size objective, but not as high as the completely modelled indicators such as climatic stability.
- 454 ● The biome to anthrome change over the last 20 years measures the conversion of natural  
455 ecosystems to different human-dominated land-use categories. This indicator is derived from  
456 satellite pictures, which are classified into biome and anthrome classes <sup>72</sup>. From these classes,  
457 the percentage change in class coverage across the image pixels falling into each site is then  
458 calculated. This indicator has a low error margin, as it is unlikely to introduce high amounts of  
459 uncertainty into the site evaluation.

460 *Climatic stability objective: **High error margin***

461 The climatic stability objective includes two conservation indicators with high error margins:

- 462 ● projected change in biodiversity until 2050 modelled under a medium emission pathway (IPCC  
463 scenario RCP 6.0 <sup>77</sup>) and associated level of global warming
- 464 ● projected change in tree cover until 2050 modelled under a medium emission pathway (IPCC  
465 scenario RCP 6.0 <sup>77</sup>) and associated level of global warming

466 Both indicators are based on models, which come with various sources of uncertainty, including the  
467 underlying biodiversity data, the chosen model type and the climatic drivers and associated models  
468 (details on can be found here <sup>74,78</sup>). Projected change in biodiversity is the turnover in species community  
469 compositions between today and 2050 based on species-specific distribution models for virtually all  
470 species of the four classes of terrestrial vertebrates (mammals, birds, reptiles, and amphibians) projected  
471 onto modelled future climatic conditions. Projected change in tree cover is measured as the percentage

472 change between today and 2050 based on a global dynamic vegetation model that was run for modelled  
473 present and future climatic conditions. These projections give an estimate where the impacts of climate  
474 change are expected to be severe and which areas might be less affected, but they come with high levels  
475 of uncertainty and models are constantly updated as they are based on human societal behaviour and  
476 political decisions. We thus expect a relatively high error margin for the climatic stability objective  
477 compared to the other objectives.

478 *Land-use stability objective: **High error margin***

479 The land-use stability objective is based on one conservation indicator:

- 480 ● percentage of projected land-use change in a buffer zone around each site (50 km buffer from  
481 site margin) until 2050 modelled under a medium emission pathway (IPCC scenario RCP 6.0  
482 <sup>77</sup>) and associated level of land-use conversion [e.g. from pasture to cropland].

483 The underlying modelled data are matching those for the conservation indicators included in the climatic  
484 stability objective. These models come with several sources of uncertainty and additionally depend on  
485 the applied assumptions of population growth and economic development (details on the methods and  
486 potential sources of uncertainty can be found here <sup>75,76</sup>). The projected changes in land-use give an  
487 indication where circumstances might be beneficial for a future increase in land-use potentially adding  
488 additional pressures on sites, but these projections are highly uncertain and need to be constantly updated  
489 as they are based on human societal behaviour and political decisions. The expected error margin for  
490 the land-use stability is thus expected to be high.

491 *Carbon storage objective: **Low error margin***

492 The carbon storage objective consists of three different measures of carbon storage as a conservation  
493 indicator:

- 494 ● baseline carbon, i.e. the amount of carbon stored in the above and below ground as well as the  
495 soil organic carbon of an ecosystem.
- 496 ● vulnerable carbon is defined as the amount of (baseline) carbon that is likely to be released  
497 through typical land conversion in an ecosystem.
- 498 ● irrecoverable carbon, is defined as the amount of carbon, that if it is lost through typical land  
499 conversion actions, and that cannot be recovered over the following 30 years.

500 All three measures are derived from the same data source <sup>79</sup> and measure carbon storage because this  
501 effectively removes the greenhouse gas carbon dioxide (CO<sub>2</sub>) from the atmosphere, thus protecting the  
502 current climate system from global warming effects. The baseline carbon estimates for the underlying  
503 dataset have been derived from various sources and combine the best estimates available. Whilst the  
504 amount of vulnerable and irrecoverable carbon strongly depend on the estimates of carbon lost through  
505 land conversion and recovery time, the overall spatial patterns of carbon storage are well-known and  
506 likely to be stable. The expected error margin for the carbon storage objective is thus expected to be  
507 comparatively low, contrary to the climatic and land-use stability objectives which depend on complex  
508 modelled datasets.

509 *Size objective: **Low error margin***

510 The only conservation indicator for the size objective is the size of the sites. This is directly calculated  
511 from shapefiles provided by the World Database on Protected Areas <sup>65</sup> and BirdLife International <sup>66</sup> and  
512 has an expected low error margin. As the calculated size depends on the accuracy of the shapefiles, this  
513 accuracy might therefore slightly affect the site evaluation for some included sites, but the errors are  
514 likely to be minor.

515

516 **References**

- 517 1. Albuquerque, F., and Beier, P. (2015). Global patterns and environmental correlates of high-  
518 priority conservation areas for vertebrates. *J. Biogeogr.* *42*, 1397–1405.
- 519 2. Allan, J.R., Possingham, H.P., Atkinson, S.C., Waldron, A., Di Marco, M., Butchart, S.H.M.,  
520 Adams, V.M., Kissling, W.D., Worsdell, T., Sandbrook, C., et al. (2022). The minimum land  
521 area requiring conservation attention to safeguard biodiversity. *Science (80- )*. *376*, 1094–  
522 1101.
- 523 3. Allan, J.R., Venter, O., and Watson, J.E.M. (2017). Temporally inter-comparable maps of  
524 terrestrial wilderness and the Last of the Wild. *Sci. Data* *4*, 170187.
- 525 4. Belote, R.T., Faurby, S., Brennan, A., Carter, N.H., Dietz, M.S., Hahn, B., McShea, W.J., and  
526 Gage, J. (2020). Mammal species composition reveals new insights into Earth’s remaining  
527 wilderness. *Front. Ecol. Environ.* *18*, 376–383.
- 528 5. Beyer, H.L., Venter, O., Grantham, H.S., and Watson, J.E.M. (2020). Substantial losses in  
529 ecoregion intactness highlight urgency of globally coordinated action. *Conserv. Lett.* *13*,  
530 e12692.
- 531 6. Brooks, T.M., Bakarr, M.I., Boucher, T.I.M., Da Fonseca, G.A.B., Hilton-Taylor, C., Hoekstra,  
532 J.M., Moritz, T.O.M., Olivieri, S., Parrish, J., Pressey, R.L., et al. (2004). Coverage Provided  
533 by the Global Protected-Area System: Is It Enough? *Bioscience* *54*, 1081–1091.
- 534 7. Brooks, T.M., Mittermeier, R.A., da Fonseca, G.A.B., Gerlach, J., Hoffmann, M., Lamoreux,  
535 J.F., Mittermeier, C.G., Pilgrim, J.D., and Rodrigues, A.S.L. (2006). Global Biodiversity  
536 Conservation Priorities. *Science (80- )*. *313*, 58–61.
- 537 8. Brum, F.T., Graham, C.H., Costa, G.C., Hedges, S.B., Penone, C., Radeloff, V.C., Rondinini,  
538 C., Loyola, R., and Davidson, A.D. (2017). Global priorities for conservation across multiple  
539 dimensions of mammalian diversity. *Proc. Natl. Acad. Sci.* *114*, 7641–7646.
- 540 9. Buchanan, G.M., Donald, P.F., and Butchart, S.H.M. (2011). Identifying Priority Areas for  
541 Conservation: A Global Assessment for Forest-Dependent Birds. *PLoS One* *6*, e29080.
- 542 10. Buhlmann, K.A., Akre, T.S.B., Iverson, J.B., Karapatakis, D., Mittermeier, R.A., Georges, A.,  
543 Rhodin, A.G.J., van Dijk, P.P., and Gibbons, J.W. (2009). A Global Analysis of Tortoise and  
544 Freshwater Turtle Distributions with Identification of Priority Conservation Areas. *Chelonian*  
545 *Conserv. Biol.* *8*, 116–149.
- 546 11. Butchart, S.H.M., Clarke, M., Smith, R.J., Sykes, R.E., Scharlemann, J.P.W., Harfoot, M.,  
547 Buchanan, G.M., Angulo, A., Balmford, A., Bertzky, B., et al. (2015). Shortfalls and Solutions  
548 for Meeting National and Global Conservation Area Targets. *Conserv. Lett.* *8*, 329–337.
- 549 12. Cantú-Salazar, L., Orme, C.D.L., Rasmussen, P.C., Blackburn, T.M., and Gaston, K.J. (2013).  
550 The performance of the global protected area system in capturing vertebrate geographic ranges.  
551 *Biodivers. Conserv.* *22*, 1033–1047.
- 552 13. Cardillo, M., Mace, G.M., Gittleman, J.L., and Purvis, A. (2006). Latent extinction risk and the  
553 future battlegrounds of mammal conservation. *Proc. Natl. Acad. Sci.* *103*, 4157–4161.
- 554 14. Carrara, R., San Blas, G., Agrain, F., and Roig-Juñent, S. (2017). Towards biodiversity  
555 hotspots effective for conserving mammals with small geographic ranges. *Acta Oecologica* *78*,  
556 7–14.
- 557 15. Ceballos, G., and Ehrlich, P.R. (2006). Global mammal distributions, biodiversity hotspots, and  
558 conservation. *Proc. Natl. Acad. Sci.* *103*, 19374–19379.



- 559 16. Chen, Y., and Peng, S. (2017). Evidence and mapping of extinction debts for global forest-  
560 dwelling reptiles, amphibians and mammals. *Sci. Rep.* 7, 44305.
- 561 17. Cimatti, M., Brooks, T.M., and Di Marco, M. (2021). Identifying science-policy consensus  
562 regions of high biodiversity value and institutional recognition. *Glob. Ecol. Conserv.* 32,  
563 e01938.
- 564 18. Daru, B.H., le Roux, P.C., Gopalraj, J., Park, D.S., Holt, B.G., and Greve, M. (2019). Spatial  
565 overlaps between the global protected areas network and terrestrial hotspots of evolutionary  
566 diversity. *Glob. Ecol. Biogeogr.* 28, 757–766.
- 567 19. Di Marco, M., Ferrier, S., Harwood, T.D., Hoskins, A.J., and Watson, J.E.M. (2019).  
568 Wilderness areas halve the extinction risk of terrestrial biodiversity. *Nature* 573, 582–585.
- 569 20. Di Marco, M., Cardillo, M., Possingham, H.P., Wilson, K.A., Blomberg, S.P., Boitani, L., and  
570 Rondinini, C. (2012). A novel approach for global mammal extinction risk reduction. *Conserv.*  
571 *Lett.* 5, 134–141.
- 572 21. Dinerstein, E., Joshi, A.R., Vynne, C., Lee, A.T.L., Pharand-Deschênes, F., França, M.,  
573 Fernando, S., Birch, T., Burkart, K., Asner, G.P., et al. (2020). A “Global Safety Net” to  
574 reverse biodiversity loss and stabilize Earth’s climate. *Sci. Adv.* 6.
- 575 22. Freudenberger, L., Hobson, P., Schluck, M., Kreft, S., Vohland, K., Sommer, H., Reichle, S.,  
576 Nowicki, C., Barthlott, W., and Ibisch, P.L. (2013). Nature conservation: priority-setting needs  
577 a global change. *Biodivers. Conserv.* 22, 1255–1281.
- 578 23. Funk, S.M., and Fa, J.E. (2010). Ecoregion Prioritization Suggests an Armoury Not a Silver  
579 Bullet for Conservation Planning. *PLoS One* 5, e8923.
- 580 24. Girardello, M., Santangeli, A., Mori, E., Chapman, A., Fattorini, S., Naidoo, R., Bertolino, S.,  
581 and Svenning, J.-C. (2019). Global synergies and trade-offs between multiple dimensions of  
582 biodiversity and ecosystem services. *Sci. Rep.* 9, 5636.
- 583 25. Goldstein, A., Turner, W.R., Spawn, S.A., Anderson-Teixeira, K.J., Cook-Patton, S., Fargione,  
584 J., Gibbs, H.K., Griscom, B., Hewson, J.H., Howard, J.F., et al. (2020). Protecting  
585 irrecoverable carbon in Earth’s ecosystems. *Nat. Clim. Chang.* 10, 287–295.
- 586 26. Gonçalves-Souza, D., Verburg, P.H., and Dobrovolski, R. (2020). Habitat loss, extinction  
587 predictability and conservation efforts in the terrestrial ecoregions. *Biol. Conserv.* 246, 108579.
- 588 27. Grenyer, R., Orme, C.D.L., Jackson, S.F., Thomas, G.H., Davies, R.G., Davies, T.J., Jones,  
589 K.E., Olson, V.A., Ridgely, R.S., Rasmussen, P.C., et al. (2006). Global distribution and  
590 conservation of rare and threatened vertebrates. *Nature* 444, 93–96.
- 591 28. Gumbs, R., Gray, C.L., Böhm, M., Hoffmann, M., Grenyer, R., Jetz, W., Meiri, S., Roll, U.,  
592 Owen, N.R., and Rosindell, J. (2020). Global priorities for conservation of reptilian  
593 phylogenetic diversity in the face of human impacts. *Nat. Commun.* 11, 2616.
- 594 29. Hanson, J.O., Rhodes, J.R., Butchart, S.H.M., Buchanan, G.M., Rondinini, C., Ficetola, G.F.,  
595 and Fuller, R.A. (2020). Global conservation of species’ niches. *Nature* 580, 232–234.
- 596 30. Hidasi-Neto, J., Loyola, R., and Cianciaruso, M. V (2015). Global and local evolutionary and  
597 ecological distinctiveness of terrestrial mammals: identifying priorities across scales. *Divers.*  
598 *Distrib.* 21, 548–559.
- 599 31. Hoekstra, J.M., Boucher, T.M., Ricketts, T.H., and Roberts, C. (2005). Confronting a biome  
600 crisis: global disparities of habitat loss and protection. *Ecol. Lett.* 8, 23–29.
- 601 32. Howard, C., Flather, C.H., and Stephens, P.A. (2020). A global assessment of the drivers of

- 602 threatened terrestrial species richness. *Nat. Commun.* *11*, 993.
- 603 33. Jenkins, C.N., Pimm, S.L., and Joppa, L.N. (2013). Global patterns of terrestrial vertebrate  
604 diversity and conservation. *Proc. Natl. Acad. Sci.* *110*, E2602–E2610.
- 605 34. Jetz, W., Thomas, G.H., Joy, J.B., Redding, D.W., Hartmann, K., and Mooers, A.O. (2014).  
606 Global Distribution and Conservation of Evolutionary Distinctness in Birds. *Curr. Biol.* *24*,  
607 919–930.
- 608 35. Jung, M., Arnell, A., de Lamo, X., García-Rangel, S., Lewis, M., Mark, J., Merow, C., Miles,  
609 L., Ondo, I., Pironon, S., et al. (2021). Areas of global importance for conserving terrestrial  
610 biodiversity, carbon and water. *Nat. Ecol. Evol.*
- 611 36. Kier, G., Kreft, H., Lee, T.M., Jetz, W., Ibsch, P.L., Nowicki, C., Mutke, J., and Barthlott, W.  
612 (2009). A global assessment of endemism and species richness across island and mainland  
613 regions. *Proc. Natl. Acad. Sci.* *106*, 9322–9327.
- 614 37. Kullberg, P., Di Minin, E., and Moilanen, A. (2019). Using key biodiversity areas to guide  
615 effective expansion of the global protected area network. *Glob. Ecol. Conserv.* *20*, e00768.
- 616 38. Lamoreux, J.F., Morrison, J.C., Ricketts, T.H., Olson, D.M., Dinerstein, E., McKnight, M.W.,  
617 and Shugart, H.H. (2006). Global tests of biodiversity concordance and the importance of  
618 endemism. *Nature* *440*, 212–214.
- 619 39. Loiseau, N., Mouquet, N., Casajus, N., Grenié, M., Guéguen, M., Maitner, B., Mouillot, D.,  
620 Ostling, A., Renaud, J., Tucker, C., et al. (2020). Global distribution and conservation status of  
621 ecologically rare mammal and bird species. *Nat. Commun.* *11*, 5071.
- 622 40. Mazel, F., Guilhaumon, F., Mouquet, N., Devictor, V., Gravel, D., Renaud, J., Cianciaruso,  
623 M.V., Loyola, R., Diniz-Filho, J.A.F., Mouillot, D., et al. (2014). Multifaceted diversity–area  
624 relationships reveal global hotspots of mammalian species, trait and lineage diversity. *Glob.*  
625 *Ecol. Biogeogr.* *23*, 836–847.
- 626 41. McDonald, R.I., Güneralp, B., Huang, C.-W., Seto, K.C., and You, M. (2018). Conservation  
627 priorities to protect vertebrate endemics from global urban expansion. *Biol. Conserv.* *224*, 290–  
628 299.
- 629 42. Myers, N., Mittermeier, R.A., Mittermeier, C.G., da Fonseca, G.A.B., and Kent, J. (2000).  
630 Biodiversity hotspots for conservation priorities. *Nature* *403*, 853–858.
- 631 43. Mittermeier, R.A., Mittermeier, C.G., Brooks, T.M., Pilgrim, J.D., Konstant, W.R., da Fonseca,  
632 G.A.B., and Kormos, C. (2003). Wilderness and biodiversity conservation. *Proc. Natl. Acad.*  
633 *Sci.* *100*, 10309–10313.
- 634 44. Mokany, K., Ferrier, S., Harwood, T.D., Ware, C., Di Marco, M., Grantham, H.S., Venter, O.,  
635 Hoskins, A.J., and Watson, J.E.M. (2020). Reconciling global priorities for conserving  
636 biodiversity habitat. *Proc. Natl. Acad. Sci.* *117*, 9906–9911.
- 637 45. Sinervo, B., Méndez-de-la-Cruz, F., Miles, D.B., Heulin, B., Bastiaans, E., Villagrán-Santa  
638 Cruz, M., Lara-Resendiz, R., Martínez-Méndez, N., Calderón-Espinosa, M.L., Meza-Lázaro,  
639 R.N., et al. (2010). Erosion of Lizard Diversity by Climate Change and Altered Thermal  
640 Niches. *Science* (80-. ). *328*, 894–899.
- 641 46. Naidoo, R., Balmford, A., Costanza, R., Fisher, B., Green, R.E., Lehner, B., Malcolm, T.R.,  
642 and Ricketts, T.H. (2008). Global mapping of ecosystem services and conservation priorities.  
643 *Proc. Natl. Acad. Sci.* *105*, 9495–9500.
- 644 47. Olson, D.M., and Dinerstein, E. (2002). The Global 200: Priority Ecoregions for Global  
645 Conservation. *Ann. Missouri Bot. Gard.* *89*, 199–224.

- 646 48. Orme, C.D.L., Davies, R.G., Burgess, M., Eigenbrod, F., Pickup, N., Olson, V.A., Webster,  
647 A.J., Ding, T.-S., Rasmussen, P.C., Ridgely, R.S., et al. (2005). Global hotspots of species  
648 richness are not congruent with endemism or threat. *Nature* 436, 1016–1019.
- 649 49. Pelletier, T.A., Carstens, B.C., Tank, D.C., Sullivan, J., and Espindola, A. (2018). Predicting  
650 plant conservation priorities on a global scale. *Proc. Natl. Acad. Sci.* 115, 13027–13032.
- 651 50. Pollock, L.J., Thuiller, W., and Jetz, W. (2017). Large conservation gains possible for global  
652 biodiversity facets. *Nature* 546, 141.
- 653 51. Montesino Pouzols, F., Toivonen, T., Di Minin, E., Kukkala, A.S., Kullberg, P., Kuusterä, J.,  
654 Lehtomäki, J., Tenkanen, H., Verburg, P.H., and Moilanen, A. (2014). Global protected area  
655 expansion is compromised by projected land-use and parochialism. *Nature* 516, 383–386.
- 656 52. Riggio, J., Baillie, J.E.M., Brumby, S., Ellis, E., Kennedy, C.M., Oakleaf, J.R., Tait, A., Tepe,  
657 T., Theobald, D.M., Venter, O., et al. (2020). Global human influence maps reveal clear  
658 opportunities in conserving Earth’s remaining intact terrestrial ecosystems. *Glob. Chang. Biol.*  
659 26, 4344–4356.
- 660 53. Rodrigues, A.S.L., Akçakaya, H.R., Andelman, S.J., Bakarr, M.I., Boitani, L., Brooks, T.M.,  
661 Chanson, J.S., Fishpool, L.D.C., Da Fonseca, G.A.B., Gaston, K.J., et al. (2004). Global Gap  
662 Analysis: Priority Regions for Expanding the Global Protected-Area Network. *Bioscience* 54,  
663 1092–1100.
- 664 54. Roll, U., Feldman, A., Novosolov, M., Allison, A., Bauer, A.M., Bernard, R., Böhm, M.,  
665 Castro-Herrera, F., Chirio, L., Collen, B., et al. (2017). The global distribution of tetrapods  
666 reveals a need for targeted reptile conservation. *Nat. Ecol. Evol.* 1, 1677–1682.
- 667 55. Rosauer, D.F., Pollock, L.J., Linke, S., and Jetz, W. (2017). Phylogenetically informed spatial  
668 planning is required to conserve the mammalian tree of life. *Proc. R. Soc. B Biol. Sci.* 284,  
669 20170627.
- 670 56. Safi, K., Armour-Marshall, K., Baillie, J.E.M., and Isaac, N.J.B. (2013). Global Patterns of  
671 Evolutionary Distinct and Globally Endangered Amphibians and Mammals. *PLoS One* 8,  
672 e63582.
- 673 57. Schipper, J., Chanson, J.S., Chiozza, F., Cox, N.A., Hoffmann, M., Katariya, V., Lamoreux, J.,  
674 Rodrigues, A.S.L., Stuart, S.N., Temple, H.J., et al. (2008). The Status of the World’s Land and  
675 Marine Mammals: Diversity, Threat, and Knowledge. *Science*. 322, 225 LP – 230.
- 676 58. Soto-Navarro, C., Ravilious, C., Arnell, A., de Lamo, X., Harfoot, M., Hill, S.L.L., Wearn,  
677 O.R., Santoro, M., Bouvet, A., Mermoz, S., et al. (2020). Mapping co-benefits for carbon  
678 storage and biodiversity to inform conservation policy and action. *Philos. Trans. R. Soc. B*  
679 *Biol. Sci.* 375, 20190128.
- 680 59. Stuart, S.N., Chanson, J.S., Cox, N.A., Young, B.E., Rodrigues, A.S.L., Fischman, D.L., and  
681 Waller, R.W. (2004). Status and trends of amphibian declines and extinctions worldwide.  
682 *Science* (80- ). 306, 1783–1786.
- 683 60. Veach, V., Di Minin, E., Pouzols, F.M., and Moilanen, A. (2017). Species richness as criterion  
684 for global conservation area placement leads to large losses in coverage of biodiversity. *Divers.*  
685 *Distrib.* 23, 715–726.
- 686 61. Venter, O., Fuller, R.A., Segan, D.B., Carwardine, J., Brooks, T., Butchart, S.H.M., Di Marco,  
687 M., Iwamura, T., Joseph, L., O’Grady, D., et al. (2014). Targeting Global Protected Area  
688 Expansion for Imperiled Biodiversity. *PLOS Biol.* 12, e1001891.
- 689 62. Voskamp, A., Baker, D.J., Stephens, P.A., Valdes, P.J., and Willis, S.G. (2017). Global  
690 patterns in the divergence between phylogenetic diversity and species richness in terrestrial

- 691 birds. *J. Biogeogr.* *44*, 709–721.
- 692 63. Watson, J.E.M., Venter, O., Lee, J., Jones, K.R., Robinson, J.G., Possingham, H.P., and Allan,  
693 J.R. (2018). Protect the last of the wild. *Nature* *563*, 27–30.
- 694 64. Rui, Y., Yue, C., Shuyu, H., Qinyi, P., Xiaoshan, W., Fangyi, W., Tz-Hsuan, T., Le, Y., Steve,  
695 C., Ian, C., et al. (2022). Cost-effective priorities for the expansion of global terrestrial  
696 protected areas: Setting post-2020 global and national targets. *Sci. Adv.* *6*, eabc3436.
- 697 65. UNEP - WCMC, and IUCN (2020). Protected Planet: The World Database on Protected Areas  
698 (WDPA).
- 699 66. BirdLife International (2019). Digital boundaries of Key Biodiversity Areas from the World  
700 Database of Key Biodiversity Areas. Developed by the KBA Partnership.  
701 <http://www.keybiodiversityareas.org/> [accessed 23.05.2019].
- 702 67. Birdlife International and NatureServe (2015). Bird species distribution maps of the world,  
703 Version 5.0. (Birdlife International).
- 704 68. IUCN (2016). The IUCN Red List of Threatened Species. See: [https://www.  
705 iucnredlist.org/resources/spatial-data-download](https://www.iucnredlist.org/resources/spatial-data-download) [accessed 15.05.17].
- 706 69. Crisp, M.D., Laffan, S., Linder, H.P., and Monro, A. (2001). Endemism in the Australian flora.  
707 *J. Biogeogr.* *28*, 183–198.
- 708 70. Rosauer, D.A.N., Laffan, S.W., Crisp, M.D., Donnellan, S.C., and Cook, L.G. (2009).  
709 Phylogenetic endemism: a new approach for identifying geographical concentrations of  
710 evolutionary history. *Mol. Ecol.* *18*, 4061–4072.
- 711 71. Newbold, T., Hudson, L.N., Arnell, A.P., Contu, S., De Palma, A., Ferrier, S., Hill, S.L.L.,  
712 Hoskins, A.J., Lysenko, I., Phillips, H.R.P., et al. (2016). Has land use pushed terrestrial  
713 biodiversity beyond the planetary boundary? A global assessment. *Science*. *353*, 288 LP – 291.
- 714 72. Niamir, A., Salati, S., Gómez-Giménez, M., Werner, C., and Hickler, T. (2020). The fraction of  
715 land cover classes; derived variables from ESA CCI Land Cover time-series (1992 - 2018)  
716 (1.0) [Data set]. Zenodo.
- 717 73. Bray, J.R., and Curtis, J.T. (1957). An ordination of the upland forest communities of southern  
718 Wisconsin. *Ecol. Monogr.* *27*, 326–349.
- 719 74. Smith, B., Wårlind, D., Arneeth, A., Hickler, T., Leadley, P., Siltberg, J., and Zaehle, S. (2014).  
720 Implications of incorporating N cycling and N limitations on primary production in an  
721 individual-based dynamic vegetation model. *Biogeosciences* *11*, 2027–2054.
- 722 75. Popp, A., Humpenöder, F., Weindl, I., Bodirsky, B.L., Bonsch, M., Lotze-Campen, H., Müller,  
723 C., Biewald, A., Rolinski, S., Stevanovic, M., et al. (2014). Land-use protection for climate  
724 change mitigation. *Nat. Clim. Chang.* *4*, 1095–1098.
- 725 76. Stevanović, M., Popp, A., Lotze-Campen, H., Dietrich, J.P., Müller, C., Bonsch, M., Schmitz,  
726 C., Bodirsky, B.L., Humpenöder, F., and Weindl, I. (2016). The impact of high-end climate  
727 change on agricultural welfare. *Sci. Adv.* *2*.
- 728 77. IPCC (2013). Climate Change 2013: The physical science basis. Contribution of working  
729 group I to the Fifth Assessment Report of the Intergovernmental Panel on Climate Change T.  
730 F. Stocker, D. Qin, G.-K. Plattner, M. Tignor, S. K. Allen, J. Boschung, A. Nauels, Y. Xia, V.  
731 Bex, and P. M. Midgley, eds. (Cambridge University Press).
- 732 78. Hof, C., Voskamp, A., Biber, M.F., Böhning-Gaese, K., Engelhardt, E.K., Niamir, A., Willis,  
733 S.G., and Hickler, T. (2018). Bioenergy cropland expansion may offset positive effects of

- 734 climate change mitigation for global vertebrate diversity. *Proc. Natl. Acad. Sci.* *115*, 13294.
- 735 79. Noon, M.L., Goldstein, A., Ledezma, J.C., Roehrdanz, P.R., Cook-Patton, S.C., Spawn-Lee,  
736 S.A., Wright, T.M., Gonzalez-Roglich, M., Hole, D.G., Rockström, J., et al. (2021). Mapping  
737 the irrecoverable carbon in Earth's ecosystems. *Nat. Sustain.* *5*, 37–46.
- 738
